# Supplementary material for: Mitigating the mistreatment of childbearing women: evaluation of respectful maternity care intervention in Ethiopian hospitals
Source: PubMed Central journal article supplement — BMJ Open. 2020 Sep 3;10(9):e038871. doi: 10.1136/bmjopen-2020-038871 (PMC7473661; doi:10.1136/bmjopen-2020-038871), 2020-09-03
Supplement: bmjopen-2020-038871.draft_revisions.pdf [file bmjopen-2020-038871.draft_revisions.pdf]

# BMJ Open

BMJ Open is committed to open peer review. As part of this commitment we make the peer review history of every article we publish publicly available.

When an article is published we post the peer reviewers' comments and the authors' responses online. We also post the versions of the paper that were used during peer review. These are the versions that the peer review comments apply to.

The versions of the paper that follow are the versions that were submitted during the peer review process. They are not the versions of record or the final published versions. They should not be cited or distributed as the published version of this manuscript.

BMJ Open is an open access journal and the full, final, typeset and author-corrected version of record of the manuscript is available on our site with no access controls, subscription charges or pay-per-view fees (<http://bmjopen.bmj.com>).

If you have any questions on BMJ Open's open peer review process please email [info.bmjopen@bmj.com](mailto:info.bmjopen@bmj.com)

# BMJ Open

## Mitigating the mistreatment of childbearing women: Evaluation of respectful maternity care intervention in Ethiopian hospitals

|                               |                                                                                                                                                                                                                                                                                                                                                                                                                                                                                                                                                                                                                                                  |
|-------------------------------|--------------------------------------------------------------------------------------------------------------------------------------------------------------------------------------------------------------------------------------------------------------------------------------------------------------------------------------------------------------------------------------------------------------------------------------------------------------------------------------------------------------------------------------------------------------------------------------------------------------------------------------------------|
| Journal:                      | <i>BMJ Open</i>                                                                                                                                                                                                                                                                                                                                                                                                                                                                                                                                                                                                                                  |
| Manuscript ID                 | bmjopen-2020-038871                                                                                                                                                                                                                                                                                                                                                                                                                                                                                                                                                                                                                              |
| Article Type:                 | Original research                                                                                                                                                                                                                                                                                                                                                                                                                                                                                                                                                                                                                                |
| Date Submitted by the Author: | 27-Mar-2020                                                                                                                                                                                                                                                                                                                                                                                                                                                                                                                                                                                                                                      |
| Complete List of Authors:     | Asefa, Anteneh; Hawassa University College of Medicine and Health Sciences, School of Public Health ; The University of Melbourne Nossal Institute for Global Health<br>Morgan, Alison; The University of Melbourne Nossal Institute for Global Health<br>Gebremedhin, Samson; Addis Ababa University College of Health Sciences, School of Public Health<br>Lemango , Ephrem; Federal Ministry of Health , Maternal and Child Health Directorate<br>Abebe, Sintayehu; Amref Health Africa in Ethiopia<br>Magge, Hema; Institute for Healthcare Improvement<br>Kermode, Michelle; The University of Melbourne Nossal Institute for Global Health |
| Keywords:                     | Clinical audit < HEALTH SERVICES ADMINISTRATION & MANAGEMENT, Quality in health care < HEALTH SERVICES ADMINISTRATION & MANAGEMENT, PUBLIC HEALTH                                                                                                                                                                                                                                                                                                                                                                                                                                                                                                |
|                               |                                                                                                                                                                                                                                                                                                                                                                                                                                                                                                                                                                                                                                                  |

SCHOLARONE™  
Manuscripts

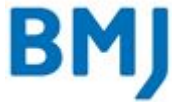

I, the Submitting Author has the right to grant and does grant on behalf of all authors of the Work (as defined in the below author licence), an exclusive licence and/or a non-exclusive licence for contributions from authors who are: i) UK Crown employees; ii) where BMJ has agreed a CC-BY licence shall apply, and/or iii) in accordance with the terms applicable for US Federal Government officers or employees acting as part of their official duties; on a worldwide, perpetual, irrevocable, royalty-free basis to BMJ Publishing Group Ltd ("BMJ") its licensees and where the relevant Journal is co-owned by BMJ to the co-owners of the Journal, to publish the Work in this journal and any other BMJ products and to exploit all rights, as set out in our [licence](#).

The Submitting Author accepts and understands that any supply made under these terms is made by BMJ to the Submitting Author unless you are acting as an employee on behalf of your employer or a postgraduate student of an affiliated institution which is paying any applicable article publishing charge ("APC") for Open Access articles. Where the Submitting Author wishes to make the Work available on an Open Access basis (and intends to pay the relevant APC), the terms of reuse of such Open Access shall be governed by a Creative Commons licence – details of these licences and which [Creative Commons](#) licence will apply to this Work are set out in our licence referred to above.

Other than as permitted in any relevant BMJ Author's Self Archiving Policies, I confirm this Work has not been accepted for publication elsewhere, is not being considered for publication elsewhere and does not duplicate material already published. I confirm all authors consent to publication of this Work and authorise the granting of this licence.

1 Mitigating the mistreatment of childbearing women: Evaluation of respectful maternity care  
2 intervention in Ethiopian hospitals  
3

4 Anteneh Asefa\*, Alison Morgan, Samson Gebremedhin, Ephrem Tekle, Sintayehu Abebe,  
5 Hema Magge, Michelle Kermode  
6

7  
8  
9 \*Corresponding author

10 Anteneh Asefa

- 11 • School of Public Health, College of Medicine and Health Sciences, Hawassa University,  
12 Hawassa, Ethiopia; [antex98@yahoo.com](mailto:antex98@yahoo.com)
- 13 • Nossal Institute for Global Health, School of Population and Global Health, University of  
14 Melbourne, Melbourne, Australia

15  
16 Co-authors

17 Alison Morgan

- 18 • Nossal Institute for Global Health, School of Population and Global Health, University of  
19 Melbourne, Melbourne, Australia; [alison.morgan@unimelb.edu.au](mailto:alison.morgan@unimelb.edu.au)

20 Samson Gebremedhin

- 21 • School of Public Health, College of Medicine and Health Sciences, Addis Ababa  
22 University, Addis Ababa, Ethiopia; [samsongmgs@yahoo.com](mailto:samsongmgs@yahoo.com)

23 Ephrem Tekle

- 24 • Maternal and Child Health Directorate, Ministry of Health, Federal Democratic Republic  
25 of Ethiopia, Addis Ababa, Ethiopia; [eplemango@gmail.com](mailto:eplemango@gmail.com)

26 Sintayehu Abebe

- 27 • Amref Health Africa in Ethiopia, Addis Ababa, Ethiopia; [sintayehumoh@gmail.com](mailto:sintayehumoh@gmail.com)

28 Hema Magge

- 29 • Institute for Healthcare Improvement, Boston, MA, USA; [hmagge@ihi.org](mailto:hmagge@ihi.org)
- 30 • Division of Global Health Equity, Brigham and Women's Hospital, Boston, MA, USA
- 31 • Division of General Pediatrics, Boston Children's Hospital, Boston, MA, USA

32 Michelle Kermode

- 33 • Nossal Institute for Global Health, School of Population and Global Health, University of  
34 Melbourne, Melbourne, Australia; [mkermode@unimelb.edu.au](mailto:mkermode@unimelb.edu.au)

## Abstract

**Objectives:** There is a lack of evidence on approaches to mitigating mistreatment during facility-based childbirth. This study compares the experiences of mistreatment reported by childbearing women before and after implementation of a respectful maternity care intervention.

**Design:** A pre-post study design was undertaken to quantify changes in women's experiences of mistreatment during facility-based childbirth before and after the respectful maternity care intervention.

**Intervention:** A respectful maternity care intervention was implemented in three hospitals in southern Ethiopia between December 2017 and September 2018 and it included training of service providers, placement of wall posters in labour rooms, and post-training supportive visits for quality improvement.

**Outcome measures:** A 25-item questionnaire asking women about mistreatment experiences was administered to 388 women (198 in the pre-intervention, 190 in the post-intervention). The outcome variable was the number of mistreatment components experienced by women, expressed as a score out of 25. Multilevel mixed-effects Poisson modelling was used to assess the change in mistreatment score from pre-to post-intervention periods.

**Results:** The number of mistreatment components experienced by women was reduced by 18% when the post-intervention group was compared with the pre-intervention group (adjusted regression coefficient ( $A\beta$ )=0.82, 95%CI: 0.74-0.91). Women who had a complication during pregnancy ( $A\beta$ =1.17, 95%CI: 1.01-1.34) and delivery ( $A\beta$ =1.16, 95%CI: 1.03-1.32) experienced a greater number of mistreatment components. On the other hand, women who delivered by caesarean delivery after trial of vaginal delivery ( $A\beta$ =0.76, 95%CI: 0.63-0.92) and caesarean delivery without trial of vaginal delivery ( $A\beta$ =0.68, 95%CI: 0.47-0.98) experienced a lesser number of mistreatment components compared to those who had vaginal delivery.

1 **Conclusions:** Women reported significantly fewer mistreatment experiences during childbirth  
2 following implementation of the intervention. Given the variety of factors that lead to  
3 mistreatment in health facilities, interventions designed to mitigate mistreatment need to involve  
4 structural changes.  
5  
6  
7  
8

9 **Keywords:** mistreatment, respectful maternity care, intervention, pre-intervention, post-  
10 intervention  
11  
12  
13

### 14 **Strengths and limitations of this study**

- 16 • This is the first study to test the effectiveness of a respectful maternity care intervention  
17 in Ethiopia, thus contributing to evidence for further endeavours in the field.
  - 18 • Comparing the counts of mistreatment components women experienced captures the  
19 diversity of mistreatment that would not have been possible to identify by simple  
20 prevalence measures.
  - 21 • Treating hospitals as random-effects in the analysis controls for the impact of other  
22 interventions that may have happened around the same time as the study intervention.
  - 23 • Mistreatment components experienced by women repeatedly were counted only once.  
24 This ignores multiple incidents of the same mistreatment component.
  - 25 • An exit survey of women is prone to recall bias in acquiring data on multiple incidents of  
26 mistreatment that would have been minimised by labour observation.
- 27  
28  
29  
30  
31  
32  
33  
34  
35  
36  
37  
38  
39  
40  
41  
42  
43  
44  
45  
46  
47  
48  
49  
50  
51  
52  
53  
54  
55  
56  
57  
58  
59  
60

## Introduction

Despite the remarkable decline in maternal mortality worldwide, around 800 women die each day due to preventable conditions that emerge in the course of pregnancy and childbirth.<sup>1</sup>

According to the World Health Organization's (WHO) estimates, 303,000 maternal deaths occurred in 2015, of which 3.6% occurred in Ethiopia.<sup>1</sup> Low utilization of maternal health care services, especially care during childbirth, is a key challenge to reducing maternal mortality.<sup>2, 3</sup>

In 2015, only 26% of women delivered in health facilities in Ethiopia.<sup>4</sup>

Women's negative experiences and/or other women's negative experiences of facility-based childbirth are commonly reported reasons for not attending a health facility at the time of delivery.<sup>5-8</sup> These experiences include hostile or insensitive staff<sup>7</sup>, disallowance of birth companions<sup>6, 7</sup>, disrespectful care<sup>9-11</sup>, women's lack of autonomy<sup>8</sup>, poor reception at health facilities<sup>6</sup>, lack of privacy<sup>6, 7</sup>, unfriendly staff<sup>12</sup>, abusive care<sup>12</sup>, and poor readiness of health facilities.<sup>12</sup> The attitudes, actions and system barriers that contribute to such negative experiences are nowadays labelled as mistreatment or disrespect and abuse. However, an internationally agreed definition of mistreatment or disrespect and abuse still lacks as behaviours that are acceptable to women in some contexts may be unacceptable to women in different contexts.

There is compelling evidence from many countries on the negative impact of mistreatment on the uptake of facility-based childbirth. An evidence synthesis of studies from 16 low and middle-income countries (LMICs) and China revealed that mistreatment during childbirth is a powerful deterrent to facility-based childbirth.<sup>13</sup> Additionally, studies from Afghanistan<sup>14</sup>, Bolivia<sup>15</sup>, Ghana<sup>16</sup>, Kenya<sup>17, 18</sup>, Tanzania<sup>19</sup>, Malawi<sup>20</sup>, and India<sup>21</sup> have clearly reported disrespectful care at birth as a key deterrent to facility-based childbirth.

The body of knowledge on mistreatment is still emerging and evolving, hence methodological approaches to estimate levels of mistreatment differ across settings, thereby making

1 comparison challenging.<sup>22, 23</sup> Prevalence studies conducted in different parts of Ethiopia  
2 between 2013 and 2017 report many examples of mistreatment ranging from non-consented  
3 care, non-confidential care, discriminatory care, abandonment of care, non-dignified care, to  
4 physical abuse during facility-based childbirth.<sup>24-28</sup>  
5  
6  
7  
8

9 The 2014 WHO statement, which condemns all forms of mistreatment during facility-based  
10 childbirth, identifies five actions to prevent and eliminate mistreatment globally. The statement  
11 calls for: evidence synthesis on the effectiveness of interventions that aim to improve respectful  
12 maternity care and thereby mitigate mistreatment, defining and measuring mistreatment, and  
13 inculcating service providers with the culture of respectful care at the time of birth.<sup>29</sup> Following  
14 this, various studies, including a multi-country study led by WHO, have been conducted to  
15 review and synthesize methodological frameworks for research on mistreatment.<sup>13, 22, 23, 30-32</sup>  
16 However, implementation research to assess the effectiveness of interventions to halt  
17 mistreatment have not been reported in Ethiopia.  
18  
19  
20  
21  
22  
23  
24  
25  
26  
27  
28

29 In the move towards mitigating mistreatment, a focus on respectful maternity care is growing  
30 globally, and the 'Universal Rights of Childbearing Women' has been endorsed in several  
31 countries.<sup>33</sup> WHO defines respectful maternity care as "the care organized for and provided to  
32 all women in a manner that maintains their dignity, privacy and confidentiality, ensures freedom  
33 from harm and mistreatment, and enables informed choice and continuous support during  
34 labour and childbirth".<sup>34</sup>  
35  
36  
37  
38  
39  
40  
41  
42

43 With the aim of meeting the maternal mortality targets of the Sustainable Development Goals  
44 (SDG), strategies for ending preventable maternal mortality were introduced in 2015. The  
45 strategy calls for health systems not to neglect respectful maternity care while endeavouring to  
46 deliver effective clinical interventions.<sup>35</sup> WHO's framework for quality maternal and newborn  
47 health care reinforces the important role of respectful maternity care, and identifies respect and  
48 preservation of dignity as one of the eight domains of quality of care.<sup>36</sup> Additionally, in 2018,  
49 WHO released guidelines for a positive childbirth experience which recommend respectful  
50  
51  
52  
53  
54  
55  
56  
57  
58  
59  
60



1 maternity care throughout labour and birth for all women.<sup>34</sup> A recent WHO paper published on  
2 the lancet that found high levels of mistreatment in four countries also highlighted the need for  
3 an urgent action to promote the provision of respectful maternity care worldwide.<sup>37</sup>  
4  
5  
6

7 The government of Ethiopia launched a national movement entitled “the caring, respectful, and  
8 compassionate (CRC) health workforce” in 2016. The initiative is one of the four health sector  
9 transformation agendas aiming to achieve health targets set for the five years between 2015/16  
10 – 2020/21.<sup>38</sup> However, respectful maternity care initiatives are in early-stage development and  
11 currently limited to a few pilot health facilities and technically supported by international partner  
12 organizations. Consequently, there is an evidence gap regarding implementation of effective  
13 respectful maternity care interventions in the country.  
14  
15  
16  
17  
18  
19  
20  
21  
22

23 This study was undertaken to assess women’s experiences of mistreatment during facility-  
24 based childbirth before and after implementation of an intervention that was designed to  
25 improve the quality of care women receive during childbirth in hospitals. Previous respectful  
26 maternity care intervention studies from Kenya<sup>39</sup> and Tanzania<sup>40, 41</sup> revealed a significant  
27 reduction in the level of mistreatment and an improved attitude of service providers towards  
28 women, as a consequence of the interventions. This study is part of a broader interventional  
29 mixed methods study that aimed to identify health system challenges to the implementation of  
30 RMC and potential solutions to address these challenges. Lessons drawn from the respectful  
31 maternity care training and its implementation<sup>42</sup> and health system constraints to the promotion  
32 of respectful maternity care in Ethiopian hospitals<sup>43</sup> are reported elsewhere. To our knowledge,  
33 this study is the first to report on the effectiveness of a respectful maternity care intervention in  
34 Ethiopia. The study findings add weight to the emerging evidence base on respectful maternity  
35 care, and will be used to inform planning and decision making concerning maternal health and  
36 other related services in Ethiopia.  
37  
38  
39  
40  
41  
42  
43  
44  
45  
46  
47  
48  
49  
50  
51  
52

## 53 **Materials and methods**

### 54 **Study setting**

1 This study was undertaken in three hospitals located in the Southern Nations Nationalities and  
2 Peoples Region (SNNPR), Ethiopia. Health services in Ethiopia are organized in three tiers:  
3 health posts, health centres, and primary hospitals are in the first tier; the second tier consists of  
4 general hospitals; and the third tier, specialized hospitals.<sup>38</sup> In principle, general hospitals are  
5 designed to serve a catchment population of 1-1.5 million people whereas primary hospitals are  
6 expected to serve 60,000 - 100,000 people. One of the study hospitals, Leku, is a primary  
7 hospital reported to be serving a catchment population of 286,149 including an estimated 8000  
8 women who give birth each year. The other two hospitals, Adare and Yirgalem, are general  
9 hospitals serving a catchment population of 341,659 and 261,293, respectively. An estimated  
10 10,000 and 9,000 pregnant women give birth each year in the catchments of Adare and  
11 Yirgalem hospitals, respectively.

### 22 **Study design**

23 This study is part of a mixed-methods implementation research study that was conducted to  
24 identify health system constraints to the promotion of respectful maternity care and to develop  
25 and assess mitigation approaches. A pre-post study that involved no comparison group was  
26 undertaken between December 2017 and September 2018 to quantify changes in women's  
27 experiences of mistreatment during facility-based childbirth. Women who delivered in the study  
28 hospitals were surveyed at the time of discharge; the pre-intervention surveys were conducted  
29 in March 2018, whereas the post-intervention surveys were conducted in July and August 2018.

### 30 **Description of the intervention**

31 The intervention included: training of service providers, placement of wall posters in labour  
32 rooms, and post-training supportive visits for quality improvement. Each of these are described  
33 below.

34 The training of service providers involved a three-day workshop using a respectful maternity  
35 care training manual developed for this intervention. The manual was drafted by maternal health  
36 researchers from Ethiopia and Australia after review of previous respectful maternity care

1 training manuals designed for low-income settings (Kenya<sup>44</sup>, Tanzania<sup>45</sup>, and Nigeria<sup>46</sup>),  
2  
3 international human rights declarations<sup>33, 47, 48</sup>, national professional codes of ethics, and  
4  
5 national training manuals on maternity care and quality improvement. The manual includes an  
6  
7 overview of maternal health in Ethiopia. It covers topics such as human rights and law in the  
8  
9 context of reproductive health, respectful maternity care rights and standards, professional  
10  
11 ethics, and continuous quality improvement. The draft manual was reviewed by three senior  
12  
13 maternal health experts at the Federal Ministry of Health and SNNPR Health Bureau for its  
14  
15 content and applicability in the Ethiopian context. Two rounds of three-day respectful maternity  
16  
17 care training sessions were conducted at Hawassa University Comprehensive Specialized  
18  
19 Teaching Hospital. The training was interactive and deployed various teaching methods  
20  
21 including presentations, role plays, demonstrations, case studies, individual readings, video  
22  
23 shows, and a hospital visit. Training sessions were facilitated by the principal investigator, a  
24  
25 senior maternal health expert from the SNNPR health bureau, and a senior obstetrician-  
26  
27 gynaecologist. A total of 64 health service providers participated in the training, 33 in the first  
28  
29 round and 31 in the second round (all were staff from the participating hospitals). Fifty-two were  
30  
31 midwives whereas the remaining were integrated emergency surgical officers (4), general  
32  
33 practitioners (3), nurses (3), and health officers (2). The SNNPR health bureau and hospital  
34  
35 administrations communicated their expectation that all service providers at the participating  
36  
37 hospitals who assist women during childbirth should attend the training. In reality, all eligible  
38  
39 service providers from Adare (26) and Leku (21) hospitals attended the training sessions. Five  
40  
41 among the 22 eligible service providers from Yirgalem hospital did not attend the training  
42  
43 sessions for personal reasons.  
44  
45

46  
47 Five types of wall posters (four in English and one in Amharic) were distributed to the hospitals  
48  
49 following completion of the service provider training. The posters were displayed in labour wards  
50  
51 and waiting rooms to serve as job aids for service providers who are trained in English to  
52  
53 become health professionals and who generally use service guidelines and reporting formats  
54  
55 prepared in English. One of the English version wall posters lists the universal rights of  
56  
57  
58  
59  
60

1 childbearing women prepared by the White Ribbon Alliance<sup>33</sup> whereas the remaining three are  
2 infographics taken from the intrapartum care for a positive childbirth experience guideline  
3 prepared by the World Health Organization<sup>34</sup> [Supplementary file 1]. The Amharic version poster  
4 described the manifestations of mistreatment during facility-based childbirth and the universal  
5 rights of childbearing women endorsed by the Federal Ministry of Health, Ethiopia  
6 [Supplementary file 1].  
7  
8  
9  
10  
11  
12

13  
14 Two rounds of post-training quality improvement supportive supervision visits were conducted  
15 by the principal investigator and a senior maternal health expert in all hospitals at two-week  
16 intervals, in June and July of 2018. During the initial visit, a facility-led assessment of maternity  
17 care settings was conducted using a structured checklist that was part of the health providers  
18 training [Supplementary file 2]. The checklist included 32 respectful maternity care standards  
19 that were assessed using observation, interview, and review of documents; the standards were  
20 grouped into five categories. Action plans were developed by service providers to address  
21 actionable gaps identified by the respectful maternity care standards assessment. The gaps that  
22 could not be addressed at the labour ward level were passed to hospital administrations for  
23 further actions [Supplementary file 2]. During the second visit, similar steps were undertaken to  
24 see changes as a result of the initial action plan and promote continuous quality improvement  
25 as a routine process. Detail information on the sequencing of the interventions and the timing of  
26 data collection of the broader study, including the current study, is appended [Supplementary  
27 file 3].  
28  
29  
30  
31  
32  
33  
34  
35  
36  
37  
38  
39  
40  
41  
42  
43

#### 44 **Participants and procedures**

45  
46 Pregnant women who gave birth in the study hospitals were eligible for inclusion in the study  
47 regardless of their mode of delivery (natural or operative) or birth outcome. Once women had  
48 completed their discharge requirements and procedures, they were invited to participate in the  
49 study and were consecutively enrolled until the required sample size was achieved for each  
50 study hospital.  
51  
52  
53  
54  
55  
56  
57  
58  
59  
60

## Sample size and sampling

Stata 14 software was used to calculate the sample size for this study using the menu option for determining the difference between two sample means with the assumption of: an anticipated mean count of mistreatment experiences women face in facility-based childbirth (pre-intervention) of 4.91, taken from a study conducted in Addis Ababa<sup>26</sup>; an anticipated mean count of mistreatment experiences women face in facility-based childbirth (post-intervention) of 3.96 (mean difference of 0.95); statistical power of 90%; an allocation ratio of 1:1 between the pre and post-intervention groups; 0.05 level of significance; and 10% non-response rate.

Additionally, women receiving care in the same hospital are more likely to receive comparable care during childbirth, so the sample size was adjusted for clustering by assuming a clustering effect of 2. With these assumptions, the minimum required sample size was calculated to be 378 (189 in the pre-intervention group and 189 in the post-intervention group). Eventually, 388 women were surveyed (190 in the pre-intervention and 198 in the post-intervention). Allocation of samples to the three hospitals was made proportionately depending on the number of women who delivered in the hospitals in the last quarter of 2017 for the pre-intervention survey, and the second quarter of 2018 for the post-intervention survey. Accordingly, 172 (87 pre-intervention, 85 post-intervention) women were surveyed from Adare hospital, whereas 86 (46 pre-intervention, 40 post-intervention) and 130 (65 pre-intervention, 65 post-intervention) were from Leku and Yirgalem hospitals, respectively. Eligible women were enrolled into the study consecutively until the required sample size was met.

## Variables and outcome measures

The survey included 25 questions about women's experiences of childbirth in the study hospitals (Table 1). The questions pertained to six categories: verbal abuse; physical abuse; non-consented care; lack of information, privacy and confidentiality; neglect and discrimination; and refusal of preference. The responses consisted of dichotomized mutually exclusive options set as "yes" or "no". The outcome variable was a count variable computed from the 25 variables clustered into the categories mentioned above; the number of mistreatment components women

1 experienced were counted as a score out of 25; maximum possible score being 25 and  
2 minimum 0.  
3

4  
5 The main independent variable of the study was whether the woman belongs to pre-intervention  
6 group or post-intervention group, i.e. whether she was hospitalised before or after the  
7 intervention. The other independent variables, i.e. potential confounders that were considered  
8 for adjustment were: sociodemographic (place of residence, age, age at first marriage, marital  
9 status, educational status, occupation, religion, ethnicity, monthly income, number of children);  
10 obstetric characteristics (complication/s during pregnancy and delivery, type of delivery,  
11 intervention/s for vaginal delivery); service utilization history (antenatal visits, history of facility-  
12 based delivery); service-related (referral status, time of admission, hours of stay, gender of  
13 service provider)  
14  
15  
16  
17  
18  
19  
20  
21  
22  
23  
24

### 25 **Questionnaire development**

26  
27 The survey questionnaire was developed as per the recommendations of a comparative  
28 analysis of five prevalence studies of mistreatment that were conducted in sub-Saharan Africa  
29 countries, including Ethiopia.<sup>22</sup> Additionally, the typology suggested by a mixed-methods  
30 systematic review on mistreatment during facility-based childbirth<sup>23</sup> was used to refine and  
31 group the 25 questions with some modifications. The questionnaire was originally prepared in  
32 English and later translated into both Amharic and Sidamu Afo languages and back-translated  
33 to check for consistency. Subsequently, an electronic data collection template was prepared  
34 using the KoBoToolbox tool and data collection was made using the KoBoCollect app for  
35 android devices.  
36  
37  
38  
39  
40  
41  
42  
43  
44  
45  
46

### 47 **Data collection**

48  
49 Data were collected by trained nurses and midwives who were fluent speakers of both Amharic  
50 and Sidamu Afo languages, recruited from Hawassa University Comprehensive Specialized  
51 Hospital. Data collectors received detailed three-day training on the purpose of the study,  
52 contents of the questionnaire and effective and ethical survey administration. The questionnaire  
53  
54  
55  
56  
57  
58  
59  
60

1 was pre-tested on 15 women who delivered in Hawassa University Comprehensive Specialized  
2 Hospital which resulted in minor modifications to the questionnaire. Before conducting the post-  
3 intervention survey, data collectors received a one-day refresher training. To ensure data  
4 quality, the supervisor reviewed completed questionnaires for key contents before they were  
5 uploaded from the tablets to the server; the principal investigator cross-checked all uploaded  
6 questionnaires for consistency and completeness.  
7  
8  
9  
10  
11  
12

### 13 **Data management and analysis**

14 Data were exported to SPSS V.24 software for cleaning and later to StataSE v.15 software for  
15 analysis. The outcome variable, number of mistreatment components women experienced, was  
16 confirmed to follow the Poisson distribution by using a one sample independent Kolmogorov-  
17 Smirnov test ( $p = 0.97$ ). Additionally, the mean (4.40) and variance (4.14) of the outcome  
18 variable were found to be close and thus suitable for Poisson modelling. Three models were  
19 constructed in this study: a null (intercept-only) model with the intercept as a fixed effect and  
20 random effects for hospitals (model I); a model containing the intervention as a fixed effect and  
21 random effects for hospitals (model II); and a model containing the intervention,  
22 sociodemographic, obstetric, and health service-related factors as fixed effects and random  
23 effects for hospitals (model III). The independent variables were checked for multicollinearity  
24 using the variance inflation factor (VIF). Hospital was set as a random-effects variable in all  
25 models to take into account the likely absence of independence among women who received  
26 care from the same hospital. Analysis results from model III are reported in this study. A  
27 multilevel mixed effects Poisson regression analysis was conducted to identify the association  
28 between the independent and outcome variables while adjusting for possible confounders. The  
29 fixed effects (association measures) and random effects (variation measures) for the number of  
30 mistreatment components experienced are reported. Adjusted exponentiated regression  
31 coefficients ( $\beta$ ) with their corresponding 95% confidence intervals (CI) were used to estimate the  
32 level of association between independent variables and the outcome variable.  
33  
34  
35  
36  
37  
38  
39  
40  
41  
42  
43  
44  
45  
46  
47  
48  
49  
50  
51  
52  
53  
54  
55  
56  
57  
58  
59  
60

## Patient involvement

Women who gave birth in the study hospitals during the survey periods were involved in the study. These women were not involved in research design, tool development, data analysis, and reporting.

## Results

### Demographics

Among the 388 women who participated in the study (198 pre-intervention, 190 post-intervention), there was no difference in the distribution of place of residence, age, age at first marriage, educational level, marital status, religion and ethnicity between the two groups (Table 2). Illiteracy was higher in the post-intervention group (20%) than in the pre-intervention group (14.7%). The proportion of women who did not have a regular monthly income was also higher in the post-intervention group (63.7%) than the pre-intervention group (55%) ( $p=.08$ ). More than two thirds (70.1%) of women in the post-intervention group were housewives compared to 51% in the pre-intervention group,  $p<.001$  (Table 2).

### Obstetric characteristics

More than half of the participants in the pre-intervention (55.6%) and post-intervention (51.6%) groups were multiparous; the median number of total deliveries was two in both groups (Table 3). The majority of women delivered their previous child at a health institution, 75.2% in the pre-intervention and 70.1% in the post-intervention group. Comparable levels of women in the pre-intervention (94.9%) and post-intervention (96.8%) groups had antenatal visits during their index pregnancy; however, having three or more antenatal visits was higher among women in the pre-intervention survey (82.4% vs 71.2%;  $p=.04$ ). Complications during the index pregnancy were reported by 17.2% of women in the pre-intervention group and 10% in the post-intervention group ( $p=.04$ ). However, complications during delivery were not significantly different between the two groups (Table 3). Compared to women in the pre-intervention group, women in the post-intervention group were less likely to have had a vaginal delivery (77.4% vs. 87.9%,  $p=.01$ ) or



1 an intervened vaginal delivery (39.5% vs. 46.4%,  $p=.15$ ). Episiotomy was the most commonly  
2 reported intervention for vaginal delivery in both groups, followed by vacuum extraction and  
3 forceps delivery (Table 3).  
4  
5

### 6 **Service characteristics**

7  
8 In relation to service characteristics, there was no difference between the pre- and post-  
9 intervention groups with respect to referral status and time of admission (Table 3). On the other  
10 hand, a higher proportion (52.5%) of women in the pre-intervention group delivered during the  
11 night-time than women in the post-intervention group (42.6%),  $p=.05$ . More than three-fifths  
12 (61.1%) of women in the pre-intervention group were assisted mainly by female service  
13 providers while the gender of service providers in the post-intervention group was almost at  
14 parity (51.6% female vs. 48.4% male) (Table 3).  
15  
16  
17  
18  
19  
20  
21  
22  
23  
24

### 25 **Preference during childbirth**

26  
27 There were 86 (43.7%) women in the pre-intervention group who wanted to have a birth  
28 companion in the labour ward, while only 17.9% of women in the post-intervention group wanted  
29 to have a birth companion ( $p<.001$ ). Among those women who wanted to have a birth  
30 companion in the pre-intervention group, 14% were afraid to ask service providers to have one  
31 (23.5% in post-intervention group). A higher proportion of women in the pre-intervention group  
32 wanted to adopt a preferred birthing position (34.9% vs. 19.1%,  $p<.001$ ) and cultural practice in  
33 the labour ward (21.7% vs. 8.9%,  $p=.001$ ) compared to the post-intervention group. More than  
34 half (51.2%) of women who wanted to have cultural practice in the pre-intervention group were  
35 afraid to ask service providers to have the practice (47.1% in post-intervention group). The  
36 proportion of women who wanted to move around during birth was did not vary significantly in  
37 the two groups (28.8% pre-intervention group vs 35.5 post-intervention group), as was the  
38 proportion of women wanting to have food or fluids during birth (35.5% pre-intervention vs  
39 33.2% post-intervention group) (Table 4).  
40  
41  
42  
43  
44  
45  
46  
47  
48  
49  
50  
51  
52  
53  
54

### 55 **Experiences of mistreatment**

1 Almost all women (99.5% pre-intervention vs 99% post-intervention group) reported  
2 experiencing at least one type of mistreatment. The number of mistreatment types experienced  
3 ranged from one to 12 in the pre-intervention group (median = 5), and one to 11 in the post-  
4 intervention group (median = 3.5).  
5  
6  
7

8  
9 When the pre-intervention and post-intervention groups are compared, a number of  
10 improvements in women's experiences of mistreatment are evident. For example, vaginal  
11 examination was performed without permission for 64.7% of women in the pre-intervention and  
12 47.9% women in the post-intervention groups,  $p=.001$  (Table 1). Additionally, failure of service  
13 providers to obtain women's consent before different procedures during childbirth, including  
14 surgery, was significantly lower during the post-intervention survey. Among women who wanted  
15 to have a birth companion present, 86.5% of women in the pre-intervention group and 69.2% in  
16 the post-intervention group were not allowed a birth companion ( $p=.04$ ). However, some  
17 aspects of mistreatment did not improve significantly following the staff training. The use of  
18 harsh or rude language by health providers was reported by 4.0% and 3.2% of women in the  
19 pre-intervention and post-intervention groups, respectively. One in ten of women (9.6%) from  
20 the pre-intervention and 5.8% from the post-intervention groups reported being gagged by the  
21 service providers. Comparable levels of women were left for a prolonged period of time without  
22 attention (9.6% in the pre-intervention group and 6.3% in the post-intervention group).  
23  
24  
25  
26  
27  
28  
29  
30  
31  
32  
33  
34  
35  
36  
37  
38

39 Additionally, more than two-thirds (67.9%) of women in the post-intervention group claimed that  
40 service providers did not give periodic updates on their labour (52.5% in the pre-intervention  
41 survey;  $p=.002$ ).  
42  
43  
44  
45

46 Apart from an overall comparison of the number of mistreatment components experienced by  
47 women in the pre-intervention and post-intervention groups, we compared the proportion of  
48 women who had encountered mistreatment grouped by six categories (verbal abuse; physical  
49 abuse; non-consented care; lack of information, privacy and confidentiality; neglect and  
50 discrimination; and refusal of preference). Table 1 describes three to five questions that  
51 measure women's experience in each of the six categories of mistreatment. Women who  
52  
53  
54  
55  
56  
57  
58  
59  
60

1 reported having experienced at least one type of mistreatment in a given category were  
2 regarded as mistreated in that category. Lack of information, privacy and confidentiality; non-  
3 consented care; and refusal of preference were the top three ranking categories of mistreatment  
4 reported by the women in both the pre-intervention and post-intervention groups. The level of  
5 non-consented care measured after the intervention (65.3%) is lower than before the  
6 intervention (83.3%),  $p < .001$ . Similarly, experiences of physical abuse (8.9% in the post-  
7 intervention and 16.7% in the pre-intervention group;  $p = .02$ ) and refusal of preference (54.7% in  
8 the post-intervention and 67.7% in the pre-intervention group;  $p = .01$ ) showed improvement  
9 when the pre-intervention group was compared with the post-intervention group. No difference  
10 was detected in the level of information provided, privacy and confidentiality between the two  
11 groups. The reported level of verbal abuse and neglect and discrimination also remained largely  
12 unchanged.

### 26 **Multilevel analysis of changes in reported components of mistreatment**

27 Outputs of the intercept-only model (model I) showed that there was significant variation  
28 between hospitals in the number of components of mistreatment experienced by women (Table  
29 5). The intraclass correlation coefficient (ICC) of model I also revealed that 12.3% of the  
30 variation in the number of components of mistreatment experienced by women is attributable to  
31 differences across hospitals. Model II, a model with the main independent variable (intervention  
32 group), was different and fit as compared to model I ( $p$  for likelihood ratio (LR) test  $< 0.001$ ).  
33 Furthermore, model III (a model that includes all the independent variables and the intervention  
34 group) was different and fit as compared to model II ( $p$  for LR test  $< 0.001$ ). The ICC of model III  
35 shows a lower variation (9%) between the hospitals than models I and II. Model III displays the  
36 changes in the number of components of mistreatment experienced by participants of the two  
37 groups (pre-intervention and post-intervention) after adjusting for potential confounders.  
38  
39  
40  
41  
42  
43  
44  
45  
46  
47  
48  
49  
50

51 As displayed in table 5, the number of components of mistreatment experienced by women in  
52 the post-intervention group is lower by 18% than those in the pre-intervention group; adjusted  
53 regression coefficient ( $A\beta$ ) = 0.82, 95%CI: 0.74-0.91. The number of components of  
54  
55  
56  
57

1 mistreatment experienced by women was higher among women with complications during  
2 pregnancy ( $A\beta = 1.17$ , 95%CI: 1.01-1.34) or delivery ( $A\beta = 1.16$ , 95%CI: 1.03-1.32). Women  
3 who delivered by caesarean section after trial of vaginal delivery ( $A\beta = 0.76$ , 95%CI: 0.63-0.92)  
4 and by caesarean section without trial of vaginal delivery ( $A\beta = 0.68$ , 95%CI: 0.47-0.98)  
5 experienced fewer number of mistreatment components. The number of mistreatment  
6 components experienced by women did not significantly vary by women's demographic,  
7 service-related, or other obstetric characteristics not already mentioned above (Table 5).  
8  
9  
10  
11  
12  
13  
14  
15

## 16 Discussion

17 This study was conducted as part of a mixed methods implementation research that aims to  
18 identify health system barriers to respectful maternity care and to propose and test mitigation  
19 approaches. To our knowledge, this study is the first to report on the effectiveness of a  
20 respectful maternity care intervention (facility-level) in Ethiopia. The study found that the number  
21 of mistreatment components experienced by women after the respectful maternity care  
22 intervention was reduced by 18% compared to the number experienced by women before the  
23 intervention. This is a notable improvement given the small-scale intervention we implemented  
24 and the known limitations of interventions focused primarily on training health workers.<sup>49</sup>  
25 Training of service providers alone cannot be a solution to address mistreatment unless other  
26 system elements that significantly influence the behaviour of service providers are also  
27 addressed.  
28  
29  
30  
31  
32  
33  
34  
35  
36  
37  
38  
39  
40  
41

42 Similar implementation studies have been conducted in response to the growing attention to  
43 mistreatment and the need to identify recommendations to eliminate mistreatment. The  
44 *Heshima* study (Kenya)<sup>39</sup> and the *Staha* study (Tanzania)<sup>41</sup> were conducted to assess the  
45 impact of respectful maternity care interventions on the level of mistreatment. The *Heshima*  
46 study involved a multi-component respectful maternity care intervention (policy, facility, and  
47 community level); 7% reduction in the prevalence of mistreatment was reported following the  
48 intervention.<sup>39</sup> The *Staha study* involved community level (client service charter) and facility-  
49  
50  
51  
52  
53  
54  
55  
56  
57  
58  
59  
60

1 level (quality improvement inventory and intervention in maternity wards) interventions, and  
2 reported a 66% reduction in the odds of women reporting mistreatment after the intervention.<sup>41</sup>  
3  
4 Both *Heshima* and *Staha* studies used a prevalence measure of mistreatment; women who  
5 faced at least one form of mistreatment were labelled as mistreated. Considering women who  
6 encountered at least one form of mistreatment as mistreated in these studies may have resulted  
7 in the underestimation of the magnitude of change.  
8  
9  
10  
11  
12

13  
14 In this study, the proportion of women who experienced non-consented care, physical abuse,  
15 and refusal of preference was significantly lower in the post-intervention group. No significant  
16 difference was observed in the proportion of women who experienced mistreatment in the  
17 remaining three categories of mistreatment (verbal abuse; lack of information, privacy and  
18 confidentiality; and neglect and discrimination). The very high proportion of women who  
19 reported 'non-consented care' suggests that the issue of obtaining consent is not well  
20 understood by the staff (and probably by the hospital administration also). Similarly, the very  
21 high proportion of women who reported 'lack of information, privacy and confidentiality' and  
22 'refusal of preferences' suggests a poor understanding of these concepts and rights. These are  
23 areas that need to be integrated and foregrounded into professional development/quality  
24 improvement programs for all levels of staff and need to be integrated into the pre-service  
25 training of health professionals.  
26  
27  
28  
29  
30  
31  
32  
33  
34  
35  
36  
37  
38  
39

40 According to the *Health Workers for Change* study conducted in four African countries,  
41 structural issues such as shortage/lack of manpower and supplies, and poor working conditions  
42 inhibit implementation of change interventions.<sup>50</sup> According to the Bowser and Hill framework<sup>51</sup>,  
43 structural constraints not only impede change initiatives, they also independently contribute to  
44 mistreatment. Thus, the categories of mistreatment that were likely to have been a product of  
45 these structural issues were not influenced by the intervention because it lacked a structural  
46 dimension.  
47  
48  
49  
50  
51  
52  
53  
54  
55  
56  
57  
58  
59  
60

1 All hospitals included in this study do not have a private ward which means that several women  
2 are labouring in the same room. This fact combined with the increased presence of birth  
3 companions after the intervention may explain the relative lack of improvement in women's  
4 privacy. Adequate preparation and adaptation of labour wards is recommended before  
5 operationalizing birth companionship in resource-limited contexts.<sup>34, 52</sup> Lunze and colleagues  
6 reviewed 259 (83 sub-Saharan Africa based) studies and reports of innovative approaches for  
7 improving maternal and newborn health, using the lens of WHO's health system building blocks.  
8 The review revealed that interventions in one health system building block affected other  
9 building blocks; the review recommends a system-wide intervention to maximize the  
10 effectiveness and sustainability of interventions.<sup>53</sup> Similarly, WHO also recommends that  
11 respectful maternity care should be viewed through the lens of systems thinking when  
12 prioritizing action areas to improve quality of care.<sup>36</sup>

13 What makes the *Staha* study similar to our study is that, no changes in the level of verbal abuse  
14 and neglect and discrimination were observed after the intervention.<sup>41</sup> This might be explained  
15 by the fact that ingrained negative and normalized behaviours require time to change and are  
16 highly associated with age and experience of service providers, younger and less experienced  
17 providers being less supportive during labour.<sup>54</sup> Additionally, other factors such as  
18 uncomfortable working circumstances, overcrowded facilities, space constraints, and poorly  
19 motivated staff are not only barriers to the implementation of new guidelines<sup>55</sup> but also  
20 contributors to mistreatment.<sup>51</sup> These factors may have contributed to the steady level of the  
21 mistreatment components that did not improve in the current study.

22 Evidence suggests that women's chosen birth companionship contributes to positive birth  
23 outcomes for both the mother and the newborn<sup>56</sup> and is recommended by the WHO.<sup>34</sup> In this  
24 study, among 120 women who wanted to have a birth companion, only 18(15%) were allowed to  
25 have their chosen companion (11.6% in pre-intervention vs 23.5% in post-intervention group).  
26 Additionally, 16.7% (14% in pre-intervention vs 23.5% in post-intervention group) of those who  
27 would have wanted to have a companion were afraid to ask service providers about this. These

1 unexpressed preferences highlight that facilities and service providers should promote  
2 companionship rather than wait for the request to come from women.<sup>34, 56</sup> And this should be  
3 supported by political commitment, high-level advocacy, and operating guidelines.<sup>57</sup> The  
4 proportion of women who reported to have their preference during childbirth in the post-  
5 intervention survey was lower than that of pre-intervention survey participants; this may be due  
6 to the high proportion of women who had a caesarean birth in the post-intervention survey.  
7  
8

9  
10  
11  
12  
13 Various macro and micro level external factors can act as enablers and disablers to change  
14 initiatives. According to WHO, emergent political unrest or conflicts result in the crackdown of  
15 health systems and deter the progress of health interventions.<sup>1</sup> A review by Sousa  
16 demonstrated that political violence deteriorates the functioning of government-operated public  
17 health services.<sup>58</sup> Accordingly, the political violence that erupted in the study area one month  
18 after training of service providers and six weeks before the post-intervention survey may have  
19 compromised the changes that would have been otherwise achieved.  
20  
21  
22  
23  
24  
25  
26  
27

28  
29 In this study, comparing the number (counts) of mistreatment components women experienced  
30 helped to identify the changes in the extent or diversity of mistreatment that would not have  
31 been possible to identify by simple prevalence measures. Additionally, treating hospitals as  
32 random-effects in the statistical model controls for the impact of other interventions that may  
33 have happened around the same time as the study intervention. The absence of difference in  
34 demographic and obstetric characteristics between women of the two groups (pre-intervention  
35 and post-intervention) also adds to the soundness of the statistical analysis used to detect  
36 changes in mistreatment. Additionally, where women are admitted in a shared ward, comparing  
37 the proportion of women mistreated rather than comparing the counts of mistreatment fails to  
38 detect changes that might have resulted after an intervention. This is because, there are  
39 components of mistreatment that cannot be totally prevented without major structural changes,  
40 for example, provision of adequate space to ensure privacy and confidentiality.<sup>40</sup>  
41  
42  
43  
44  
45  
46  
47  
48  
49  
50  
51  
52  
53  
54  
55  
56  
57  
58  
59  
60

1 One of the limitations of this study is that the mistreatment components experienced by women  
2 repeatedly were counted only once. This approach ignores multiple incidents of mistreatment  
3 components experienced by women; hence, it fails to capture how frequently women were  
4 mistreated. A survey of women at their exit, as in this study, is prone to recall bias in acquiring  
5 data on multiple incidents; instead, independent observation in the labour room would be more  
6 appropriate.<sup>59</sup> However, observation also has inherent limitations, e.g. the Hawthorne effect—  
7 service providers modify their behaviour and become less disrespectful because they know they  
8 are being observed. Pertaining to the generalizability of findings, because the study was  
9 conducted only in three hospitals located in the SNNPR, the findings may not be generalizable  
10 to other types of hospitals, health centres, and clinics that provide childbirth services in Ethiopia.  
11 Additionally, the short washout period and the lack of a control group in this study is a key  
12 limitation as it is not possible to attribute with certainty the changes observed to the respectful  
13 maternity care intervention.

14  
15 Finally, we believe that this study being the first to test the effectiveness of a respectful  
16 maternity care intervention in Ethiopia, contributes to evidence for further endeavours to  
17 improve respectful maternity care specifically, and the quality of childbirth services generally.  
18 Thorough implementation studies that are designed to capture macro and micro level  
19 contributors to mistreatment need to be conducted to inform evidence-driven actions to  
20 eliminate mistreatment during facility-based childbirth in Ethiopia.

## 21 **Conclusions**

22 This study revealed that the childbirth services women received in the study hospitals were  
23 characterized by a wide range of mistreatment behaviours and/or health facility conditions. The  
24 respectful maternity care intervention tested in this study was accompanied by a reduction in  
25 women's experience of mistreatment during facility-based childbirth. Given the variety of factors  
26 that lead to mistreatment in health facilities, interventions designed to mitigate mistreatment  
27 need to be multidimensional—including demand-side (community level), supply-side (health  
28 system level), and policy-level interventions. We believe that this study adds to existing



1 knowledge on innovations that can be used to mitigate mistreatment. Further research is  
2 needed to investigate the impact and sustainability of health system-level interventions on  
3 women's experiences of mistreatment during facility-based childbirth.  
4  
5

### 6 **Acknowledgements**

7  
8 We would like to pass our heartfelt thanks to experts at the Federal Ministry of Health, the  
9 SNNPR Health Bureau, and Hawassa University College of Medicine and Health Sciences who  
10 reviewed the respectful maternity care training manual and coordinated the training sessions.  
11 We also extend our appreciation to all participants of the study, service providers, and facility  
12 administrations for being an active player in the smooth operation of the study. Members of the  
13 data collection team also deserve a warm appreciation for their engagement.  
14  
15

### 16 **Contributors**

17  
18 AA conceived the study; AA, AM and MK designed the study, developed data collection tools;  
19 AA trained data collectors, coordinated the fieldwork; AA, SA, HM, ET and SG conducted the  
20 intervention; AA, AM and MK analysed the data; AA, AM and MK drafted the manuscript; SA,  
21 HM, ET and SG revised the manuscript for intellectual content. All authors have read and  
22 approved the manuscript.  
23  
24

### 25 **Funding**

26  
27 The training of service providers was made possible by support from the Institute of Healthcare  
28 Improvement (IHI) through the Federal Ministry of Health, Ethiopia. The primary author of this  
29 study is the recipient of the Melbourne Research Scholarship (University of Melbourne), and the  
30 Population Health Investing in Research Students' Training (PHIRST) travel grant (Melbourne  
31 School of Population and Global Health, University of Melbourne). The contents of this research  
32 article only reflect the authors' opinions but do not show interest/s of either of the organizations  
33 involved in the funding.  
34  
35

### 36 **Competing interests**

37  
38 The authors declare that they have no competing interests  
39  
40  
41  
42  
43  
44  
45  
46  
47  
48  
49  
50  
51  
52  
53

## Ethics approval

Ethics approval was obtained from the Institutional Review Board (Ethics ID: 3-12/12926) located in SNNPR Health Bureau, Ethiopia and the Human Ethics Sub-Committee (Ethics ID: HESC 1750054) at the University of Melbourne, Australia. Permission letter to conduct this study was also granted from the Federal Ministry of Health and SNNPR Health Bureau. Information about the study was delivered to all study participants in local languages and written consent was obtained.

## Data sharing statement

Reasonable requests can be made to access study data from the corresponding author.

**Word count: 5786**

## References

1. World Health Organization. Trends in maternal mortality: 1990 to 2015: Estimates by WHO, UNICEF, UNFPA, World Bank Group and the United Nations Population Division. Geneva, Switzerland: World Health Organization; 2015.
2. Alvarez JL, Gil R, Hernandez V, Gil A. Factors associated with maternal mortality in Sub-Saharan Africa: an ecological study. *BMC public health*. 2009;9:462.
3. Every Woman Every Child. The global strategy for women's, children's and adolescents' health (2016-2030). *Every Woman Every Child*; 2015.
4. Central Statistical Agency (CSA) [Ethiopia] and ICF. Ethiopia Demographic and Health Survey 2016: Key Indicators Report. Addis Ababa, Ethiopia, and Rockville, Maryland, USA: CSA and ICF; 2016.
5. Hailu D, Berhe H. Determinants of institutional childbirth service utilisation among women of childbearing age in urban and rural areas of Tsegedie district, Ethiopia. *Midwifery*. 2014;30(11):1109-17.
6. Roro MA, Hassen EM, Lemma AM, Gebreyesus SH, Afework MF. Why do women not deliver in health facilities: a qualitative study of the community perspectives in south central Ethiopia? *BMC Res Notes*. 2014;7:556.
7. Sipsma H, Thompson J, Maurer L, Bradley E, Curry L. Preferences for home delivery in Ethiopia: provider perspectives. *Glob Public Health*. 2013;8(9):1014-26.
8. Tarekegn SM, Lieberman LS, Giedraitis V. Determinants of maternal health service utilization in Ethiopia: analysis of the 2011 Ethiopian Demographic and Health Survey. *BMC pregnancy and childbirth*. 2014;14:161.
9. Mirkuzie AH. Exploring inequities in skilled care at birth among migrant population in a metropolitan city Addis Ababa, Ethiopia; a qualitative study. *Int J Equity Health*. 2014;13:110.
10. Jackson R, Tesfay FH, Godefay H, Gebrehiwot TG. Health Extension Workers' and Mothers' Attitudes to Maternal Health Service Utilization and Acceptance in Adwa Woreda, Tigray Region, Ethiopia. *PLoS One*. 2016;11(3):e0150747.
11. Wassihun B, Zeleke S. Compassionate and respectful maternity care during facility based child birth and women's intent to use maternity service in Bahir Dar, Ethiopia. *BMC pregnancy and childbirth*. 2018;18(1):294.
12. King R, Jackson R, Dietsch E, Hailemariam A. Barriers and facilitators to accessing skilled birth attendants in Afar region, Ethiopia. *Midwifery*. 2015;31(5):540-6.

- 1 13. Bohren MA, Hunter EC, Munthe-Kaas HM, Souza JP, Vogel JP, Gulmezoglu AM. Facilitators and  
2 barriers to facility-based delivery in low- and middle-income countries: a qualitative evidence  
3 synthesis. *Reproductive health*. 2014;11(1):71.
- 4 14. Tappis H, Koblinsky M, Doocy S, Warren N, Peters DH. Bypassing Primary Care Facilities for  
5 Childbirth: Findings from a Multilevel Analysis of Skilled Birth Attendance Determinants in  
6 Afghanistan. *J Midwifery Womens Health*. 2016;61(2):185-95.
- 7 15. Otis KE, Brett JA. Barriers to hospital births: why do many Bolivian women give birth at home?  
8 *Revista Pana-mericana de Salud Publica*. 2008;24(1):46-53.
- 9 16. Crissman HP, Engmann CE, Adanu RM, Nimako D, Crespo K, Moyer CA. Shifting norms: pregnant  
10 women's perspectives on skilled birth attendance and facility-based delivery in rural Ghana. *Afr J  
11 Reprod Health*. 2013;17(1):15-26.
- 12 17. Dahlberg M, Södergård B, Thorson A, Alfvén T, Awiti-Ujiji O. Being perceived as 'a real woman' or  
13 following one's own convictions: a qualitative study to understand individual, family, and community  
14 influences on the place of childbirth in Busia, Kenya. *Culture, Health & Sexuality*. 2015;17(3):326-  
15 42.
- 16 18. Kwambai TK, Dellicour S, Desai M, Ameh CA, Person B, Achieng F, et al. Perspectives of men on  
17 antenatal and delivery care service utilisation in rural western Kenya: a qualitative study. *BMC  
18 pregnancy and childbirth*. 2013;13:134.
- 19 19. Kujawski S, Mbaruku G, Freedman LP, Ramsey K, Moyo W, Kruk ME. Association Between  
20 Disrespect and Abuse During Childbirth and Women's Confidence in Health Facilities in Tanzania.  
21 *Matern Child Health J*. 2015;19(10):2243-50.
- 22 20. Seljeskog L, Sundby J, Chimango J. Factors influencing women's choice of place of delivery in  
23 rural Malawi--an explorative study. *Afr J Reprod Health*. 2006;10(3):66-75.
- 24 21. Bruce SG, Blanchard AK, Gurav K, Roy A, Jayanna K, Mohan HL, et al. Preferences for infant  
25 delivery site among pregnant women and new mothers in Northern Karnataka, India. *BMC  
26 pregnancy and childbirth*. 2015;15:49.
- 27 22. Sando D, Abuya T, Asefa A, Banks KP, Freedman LP, Kujawski S, et al. Methods used in  
28 prevalence studies of disrespect and abuse during facility based childbirth: lessons learned.  
29 *Reproductive health*. 2017;14(1):127.
- 30 23. Bohren MA, Vogel JP, Hunter EC, Lutsiv O, Makh SK, Souza JP, et al. The Mistreatment of  
31 Women during Childbirth in Health Facilities Globally: A Mixed-Methods Systematic Review. *PLoS  
32 medicine*. 2015;12(6):e1001847; discussion e.
- 33 24. Banks KP, Karim AM, Ratcliffe HL, Betemariam W, Langer A. Jeopardizing quality at the frontline of  
34 healthcare: prevalence and risk factors for disrespect and abuse during facility-based childbirth in  
35 Ethiopia. *Health Policy Plan*. 2018;33(3):317-27.
- 36 25. Gebremichael MW, Worku A, Medhanyie AA, Berhane Y. Mothers' experience of disrespect and  
37 abuse during maternity care in northern Ethiopia. *Glob Health Action*. 2018;11(sup3):1465215.
- 38 26. Asefa A, Bekele D. Status of respectful and non-abusive care during facility-based childbirth in a  
39 hospital and health centers in Addis Ababa, Ethiopia. *Reproductive health*. 2015;12:33.
- 40 27. Asefa A, Bekele D, Morgan A, Kermode M. Service providers' experiences of disrespectful and  
41 abusive behavior towards women during facility based childbirth in Addis Ababa, Ethiopia.  
42 *Reproductive health*. 2018;15(1):4.
- 43 28. Sheferaw ED, Bazant E, Gibson H, Fenta HB, Ayalew F, Belay TB, et al. Respectful maternity care  
44 in Ethiopian public health facilities. *Reprod Health*. 2017;14(1):60.
- 45 29. World Health Organization. The prevention and elimination of disrespect and abuse during facility-  
46 based childbirth. World Health Organization; 2014.
- 47 30. Vogel JP, Bohren MA, Tuncalp O, Oladapo OT, Adanu RM, Balde MD, et al. How women are  
48 treated during facility-based childbirth: development and validation of measurement tools in four  
49 countries - phase 1 formative research study protocol. *Reproductive health*. 2015;12:60.
- 50 31. Rubashkin N, Warnock R, Diamond-Smith N. A systematic review of person-centered care  
51 interventions to improve quality of facility-based delivery. *Reproductive health*. 2018;15(1):169.
- 52 32. Nilvér H, Begley C, Berg M. Measuring women's childbirth experiences: a systematic review for  
53 identification and analysis of validated instruments. *BMC pregnancy and childbirth*. 2017;17(1):203.
- 54 33. White Ribbon Alliance. Respectful maternity care: the universal rights of childbearing women.  
55 Washington (District of Columbia): White Ribbon Alliance; 2011.
- 56 34. World Health Organization. WHO recommendations: Intrapartum care for a positive childbirth  
57 experience. World Health Organization; 2018.
- 58 35. World Health Organization. Strategies toward ending preventable maternal mortality (EPMM).  
59 World Health Organization; 2015.

36. World Health Organization. Standards for improving quality of maternal and newborn care in health facilities. World Health Organization; 2016.
37. Bohren MA, Mehtash H, Fawole B, Maung TM, Balde MD, Maya E, et al. How women are treated during facility-based childbirth in four countries: a cross-sectional study with labour observations and community-based surveys. *Lancet*. 2019.
38. The Federal Democratic Republic of Ethiopia Ministry of Health. Health Sector Transformation Plan: 2015/16 - 2019/20. Addis Ababa, Ethiopia: Federal Ministry of Health; 2015.
39. Abuya T, Ndwiga C, Ritter J, Kanya L, Bellows B, Binkin N, et al. The effect of a multi-component intervention on disrespect and abuse during childbirth in Kenya. *BMC pregnancy and childbirth*. 2015;15(1):224.
40. Ratcliffe HL, Sando D, Lyatuu GW, Emil F, Mwanyika-Sando M, Chalamilla G, et al. Mitigating disrespect and abuse during childbirth in Tanzania: an exploratory study of the effects of two facility-based interventions in a large public hospital. *Reproductive health*. 2016;13(1):79.
41. Kujawski SA, Freedman LP, Ramsey K, Mbaruku G, Mbuyita S, Moyo W, et al. Community and health system intervention to reduce disrespect and abuse during childbirth in Tanga Region, Tanzania: A comparative before-and-after study. *PLoS medicine*. 2017;14(7):e1002341.
42. Asefa A, Morgan A, Bohren MA, Kermode M. Lessons learned through respectful maternity care training and its implementation in Ethiopia: An interventional mixed methods study. 2019.
43. Asefa A, McPake B, Langer A, Bohren MA, Morgan A. Imagining maternity care as a complex adaptive system: understanding health system constraints to the promotion of respectful maternity care. 2020.
44. Charity N, Warren C, Abuya T, Kanya L, AliceMaranga, Ochieng C, et al. Promoting respectful maternity care a training guide for facility-based workshops. New York: Population Council; 2015.
45. Maternal and Child Health Integrated Program. Respectful maternity care workshop: Learning resource package. Maternal and Child Health Integrated Program; 2013.
46. White Ribbon Alliance. Respectful Maternity Care: A Nigeria Focused Health Workers' Training Guide. Washington, DC: Futures Group, Health Policy Project; 2015.
47. United Nations. Universal Declaration of Human Rights: United Nations; 1948 [Available from: <http://www.un.org/en/universal-declaration-human-rights/>].
48. United Nations General Assembly. Technical guidance on the application of a human rightsbased approach to the implementation of policies and programmes to reduce preventable maternal morbidity and mortality. United Nations; 2012.
49. Chang YS, Coxon K, Portela AG, Furuta M, Bick D. Interventions to support effective communication between maternity care staff and women in labour: A mixed-methods systematic review. *Midwifery*. 2018;59:4-16.
50. Fonn S, Mtonga AS, Nkoloma HC, Bantebya Kyomuhendo G, daSilva L, Kazilimani E, et al. Health providers' opinions on provider-client relations: results of a multi-country study to test Health Workers for Change. *Health Policy Plan*. 2001;16 Suppl 1:19-23.
51. Bowser D, Hill K. Exploring Evidence for Disrespect and Abuse in Facility-Based Childbirth-A landscape analysis of the global situation of abuse and disrespect in maternity care. USAID, Traction Project; 2010.
52. Miller S, Abalos E, Chamillard M, Ciapponi A, Colaci D, Comande D, et al. Beyond too little, too late and too much, too soon: a pathway towards evidence-based, respectful maternity care worldwide. *Lancet*. 2016.
53. Lunze K, Higgins-Steele A, Simen-Kapeu A, Vesel L, Kim J, Dickson K. Innovative approaches for improving maternal and newborn health--A landscape analysis. *BMC pregnancy and childbirth*. 2015;15:337.
54. Barrett SJ, Stark MA. Factors associated with labor support behaviors of nurses. *J Perinat Educ*. 2010;19(1):12-8.
55. Spallek H, Song M, Polk DE, Bekhuis T, Frantsve-Hawley J, Aravamudhan K. Barriers to implementing evidence-based clinical guidelines: a survey of early adopters. *J Evid Based Dent Pract*. 2010;10(4):195-206.
56. Hodnett ED, Gates S, Hofmeyr GJ, Sakala C. Continuous support for women during childbirth. *Cochrane Database of Systematic Reviews*. 2013(7).
57. Sharma G, Mathai M, Dickson KE, Weeks A, Hofmeyr G, Lavender T, et al. Quality care during labour and birth: a multi-country analysis of health system bottlenecks and potential solutions. *BMC pregnancy and childbirth*. 2015;15 Suppl 2:S2.
58. Sousa CA. Political violence, collective functioning and health: a review of the literature. *Med Confl Surviv*. 2013;29(3):169-97.

1  
2  
3  
4  
5  
6  
7  
8  
9  
10  
11  
12  
13  
14  
15  
16  
17  
18  
19  
20  
21  
22  
23  
24  
25  
26  
27  
28  
29  
30  
31  
32  
33  
34  
35  
36  
37  
38  
39  
40  
41  
42  
43  
44  
45  
46  
47  
48  
49  
50  
51  
52  
53  
54  
55  
56  
57  
58  
59  
60

59. Bohren MA, Vogel JP, Fawole B, Maya ET, Maung TM, Balde MD, et al. Methodological development of tools to measure how women are treated during facility-based childbirth in four countries: labor observation and community survey. BMC Med Res Methodol. 2018;18(1):132.

For peer review only

**Table 1 Women's experience of mistreatment during childbirth**

| <b>Types of mistreatment experienced</b>                                                                          | <b>Pre-intervention<br/>n (%)</b> | <b>Post-intervention<br/>n (%)</b> | <b>p-value<br/>for <math>\chi^2</math></b> |
|-------------------------------------------------------------------------------------------------------------------|-----------------------------------|------------------------------------|--------------------------------------------|
| <b>Verbal abuse</b>                                                                                               | 17 (8.6)                          | 11 (5.8)                           | 0.29                                       |
| Health workers used harsh or rude language                                                                        | 8 (4.0)                           | 6 (3.2)                            | 0.64                                       |
| Health workers made judgmental or accusatory comments about woman                                                 | 8 (4.1)                           | 2 (1.1)                            | 0.06                                       |
| Health workers made threats of withholding treatment                                                              | 1 (0.5)                           | 2 (1.1)                            | 0.54                                       |
| Health workers blamed woman for any features of birth outcome                                                     | 4 (2.0)                           | 4 (2.1)                            | 0.95                                       |
| <b>Physical abuse</b>                                                                                             | 33 (16.7)                         | 17 (8.9)                           | 0.02*                                      |
| Woman was beaten, slapped, kicked, or pinched                                                                     | 7 (3.5)                           | 5 (2.6)                            | 0.61                                       |
| Woman was gagged                                                                                                  | 19 (9.6)                          | 11 (5.8)                           | 0.16                                       |
| Woman was restrained                                                                                              | 19 (9.6)                          | 9 (4.74)                           | 0.06                                       |
| <b>Non-consented care</b>                                                                                         | 165 (83.3)                        | 124 (65.3)                         | <0.001*                                    |
| Health workers did not obtain consent for procedure/s                                                             | 138 (69.7)                        | 84 (44.2)                          | <0.001*                                    |
| Health workers ever separated woman from her baby without explaining                                              | 14 (7.1)                          | 7 (3.7)                            | 0.14                                       |
| Health workers did not ask woman's permission before conducting vaginal examination                               | 128 (64.7)                        | 91 (47.9)                          | 0.001*                                     |
| Health workers did not ask woman's permission before performing surgery (episiotomy or caesarean section) (n=220) | 69 (65.1)                         | 44 (38.6)                          | <0.001*                                    |
| Health workers made woman stay in the hospital against her will                                                   | 4 (2.0)                           | 2 (1.1)                            | 0.44                                       |
| <b>Lack of information, privacy and confidentiality</b>                                                           | 189 (95.5)                        | 182 (95.8)                         | 0.88                                       |
| Health workers did not keep woman's information confidential                                                      | 18 (9.1)                          | 7 (3.7)                            | 0.03*                                      |
| Health workers conducted vaginal examination without maintaining woman's privacy                                  | 162 (81.8)                        | 147 (77.4)                         | 0.28                                       |
| Health workers did not give periodic updates on woman's labour                                                    | 104 (52.5)                        | 129 (67.9)                         | 0.002*                                     |
| Health workers spoke to woman in a language she could not understand                                              | 5 (2.5)                           | 9 (4.7)                            | 0.24                                       |
| <b>Neglect and discrimination</b>                                                                                 | 24 (12.1)                         | 17 (8.9)                           | 0.31                                       |
| Health workers did not always come following woman's call                                                         | 8 (4.0)                           | 7 (3.7)                            | 0.86                                       |
| Woman was ever left for a prolonged period of time without attention                                              | 19 (9.6)                          | 12 (6.3)                           | 0.23                                       |
| Health worker was not present for the actual birth of woman's baby                                                | 5 (2.5)                           | 3 (1.6)                            | 0.51                                       |
| Health workers discriminated woman based on her attribute                                                         | -                                 | 2 (1.1)                            | -                                          |
| <b>Refusal of preference</b>                                                                                      | 134 (67.7)                        | 104 (54.7)                         | 0.01*                                      |
| Health workers did not allow woman to have a birth companion present                                              | 64 (86.5)                         | 18 (69.2)                          | 0.04*                                      |
| Health workers did not allow woman to move around during labour                                                   | 43 (76.7)                         | 63 (94.3)                          | 0.002*                                     |
| Health workers did not allow woman to have foods or fluids                                                        | 66 (94.3)                         | 62 (98.4)                          | 0.21                                       |
| Health workers did not allow woman to deliver in her preferred position                                           | 43 (66.2)                         | 12 (33.3)                          | 0.001*                                     |
| Health workers did not allow woman to have cultural practice in labour                                            | 16 (76.2)                         | 0 (-)                              | -                                          |

**Table 2 Women's sociodemographic characteristics**

| Variables                                 |                      | Pre-intervention<br>n (%) | Post-intervention<br>n (%) | p-value<br>for $\chi^2$ |
|-------------------------------------------|----------------------|---------------------------|----------------------------|-------------------------|
| Place of residence                        | Urban                | 125 (63.1)                | 119 (62.6)                 | 0.92                    |
|                                           | Rural                | 73 (36.9)                 | 71 (37.4)                  |                         |
| Age in completed year                     | 15-24                | 98 (49.5)                 | 96 (50.5)                  | 0.93                    |
|                                           | 25-34                | 89 (45.0)                 | 85 (44.8)                  |                         |
|                                           | 35-44                | 11 (5.5)                  | 9 (4.7)                    |                         |
|                                           | Median (IQR)         | 25 (7)                    | 24 (8)                     |                         |
| Age at first pregnancy                    | Median (IQR)         | 20 (4)                    | 20 (4)                     | 0.72                    |
| Educational level                         | No formal education  | 29 (14.7)                 | 38 (20.0)                  | 0.13                    |
|                                           | Primary education    | 81 (40.9)                 | 74 (39.0)                  |                         |
|                                           | Secondary education  | 48 (24.2)                 | 54 (28.4)                  |                         |
|                                           | College and above    | 40 (20.2)                 | 24 (12.6)                  |                         |
| Marital status                            | Single               | 2 (1.0)                   | 1 (0.5)                    | 0.86                    |
|                                           | Married              | 195 (98.5)                | 188 (99.0)                 |                         |
|                                           | Separated            | 1 (0.5)                   | 1 (0.5)                    |                         |
| Religion                                  | Christian Protestant | 140 (70.7)                | 141 (74.2)                 | 0.29                    |
|                                           | Christian Orthodox   | 27 (13.6)                 | 27 (14.2)                  |                         |
|                                           | Christian Catholic   | 7 (3.5)                   | 2 (1.0)                    |                         |
|                                           | Muslim               | 17 (8.6)                  | 10 (5.3)                   |                         |
|                                           | Others               | 7 (3.6)                   | 10 (5.3)                   |                         |
| Ethnicity                                 | Sidama               | 139 (70.2)                | 128 (67.4)                 | 0.20                    |
|                                           | Oromo                | 7 (3.5)                   | 15 (7.9)                   |                         |
|                                           | Amhara               | 13 (6.6)                  | 17 (9.0)                   |                         |
|                                           | Wolayita             | 17 (8.6)                  | 17 (9.0)                   |                         |
|                                           | Others               | 22 (11.)                  | 13 (6.8)                   |                         |
| Occupation                                | Housewife            | 101 (51.0)                | 134 (70.5)                 | < 0.001                 |
|                                           | Private employee     | 8 (4.0)                   | 8 (4.21)                   |                         |
|                                           | Government employee  | 36 (18.2)                 | 29 (15.3)                  |                         |
|                                           | Private business     | 41 (20.7)                 | 13 (6.8)                   |                         |
|                                           | Others               | 12 (6.1)                  | 6 (3.2)                    |                         |
| Respondent has regular<br>monthly income* | Yes                  | 89 (45.0)                 | 69 (36.3)                  | 0.08                    |
|                                           | < 1552 Br            | 34 (38.2)                 | 25 (36.2)                  | 0.8                     |
|                                           | ≥ 1552 Br            | 55 (61.8)                 | 44 (63.8)                  |                         |
|                                           | Median (IQR)         | 2000 (2015)               | 2000 (1900)                |                         |
|                                           | No                   | 109 (55.0)                | 121 (63.7)                 |                         |

\*1USD = 27.23 Br (Average between March and August 2018)

**Table 3 Women's obstetric and maternal healthcare characteristics**

| Variables                                               |                                             | Pre-intervention<br>n (%) | Post-intervention<br>n (%) | p-value<br>for $\chi^2$ |      |
|---------------------------------------------------------|---------------------------------------------|---------------------------|----------------------------|-------------------------|------|
| Total number of deliveries                              | One                                         | 88 (44.4)                 | 92 (48.4)                  | 0.43                    |      |
|                                                         | Two or more                                 | 110 (55.6)                | 98 (51.6)                  |                         |      |
|                                                         | Median (IQR)                                | 2 (1)                     | 2 (2)                      |                         |      |
| Place of delivery of previous child (n=206)             | Health facility                             | 82 (75.2)                 | 68 (70.1)                  | 0.41                    |      |
|                                                         | Outside health facility                     | 27 (24.8)                 | 29 (29.9)                  |                         |      |
| Number of previous facility-based deliveries            | None                                        | 22 (20.2)                 | 22 (22.5)                  |                         |      |
|                                                         | One                                         | 69 (63.3)                 | 53 (54.0)                  |                         |      |
|                                                         | Two and more                                | 18 (16.5)                 | 23 (23.5)                  |                         |      |
|                                                         | Median (IQR)                                | 1 (0)                     | 1 (0)                      |                         |      |
| Antenatal visit during index pregnancy                  | Yes                                         | 188 (94.9)                | 184 (96.8)                 | 0.35                    |      |
|                                                         | One                                         | 5 (2.7)                   | 9 (4.9)                    |                         | 0.04 |
|                                                         | Two                                         | 28 (14.9)                 | 44 (23.9)                  |                         |      |
|                                                         | Three or more                               | 155 (82.4)                | 131 (71.2)                 |                         |      |
|                                                         | No                                          | 10 (5.1)                  | 6 (3.2)                    |                         |      |
| Experienced complication during index pregnancy         | Yes                                         | 34 (17.2)                 | 19 (10.0)                  | 0.04                    |      |
|                                                         | No                                          | 164 (82.8)                | 171 (90.0)                 |                         |      |
| Experienced complication during index delivery          | Yes                                         | 67 (34.0)                 | 70 (36.8)                  | 0.56                    |      |
|                                                         | No                                          | 130 (66.0)                | 120 (63.2)                 |                         |      |
| Referral status on admission                            | Referred                                    | 81 (40.9)                 | 86 (45.3)                  | 0.39                    |      |
|                                                         | Non-referred                                | 117 (59.1)                | 104 (54.4)                 |                         |      |
| Time of admission*                                      | Day time                                    | 106 (53.5)                | 99 (52.1)                  | 0.78                    |      |
|                                                         | Night-time                                  | 92 (46.5)                 | 91 (47.9)                  |                         |      |
| Time of delivery*                                       | Day time                                    | 94 (47.5)                 | 109 (57.4)                 | 0.05                    |      |
|                                                         | Night-time                                  | 104 (52.5)                | 81 (42.6)                  |                         |      |
| Type of delivery                                        | Vaginal delivery                            | 174 (87.9)                | 147 (77.4)                 | 0.01                    |      |
|                                                         | Caesarean after trial of vaginal delivery   | 18 (9.1)                  | 38 (20.0)                  |                         |      |
|                                                         | Caesarean without trial of vaginal delivery | 6 (3.0)                   | 5 (2.6)                    |                         |      |
| Had intervention/s for vaginal delivery (n=377)**       | Yes                                         | 89 (46.4)                 | 73 (39.5)                  | 0.15                    |      |
|                                                         | No                                          | 101 (53.6)                | 111 (60.5)                 |                         |      |
| Types of assisted vaginal delivery (n=162) <sup>§</sup> | Vacuum extraction                           | 12 (13.5)                 | 9 (12.3)                   | 0.83                    |      |
|                                                         | Forceps delivery                            | 8 (9.0)                   | 2 (2.7)                    |                         | 0.10 |
|                                                         | Episiotomy                                  | 82 (92.1)                 | 71 (97.3)                  |                         |      |
| Gender of main service provider                         | Female                                      | 121 (61.1)                | 98 (51.6)                  | 0.06                    |      |
|                                                         | Male                                        | 77 (38.9)                 | 92 (48.4)                  |                         |      |

\*Stayed in hospital for at least two hours between 8pm and 8am immediately before childbirth

\*\*Includes: Episiotomy, vacuum extractor or forceps

<sup>§</sup>a woman can have more than one procedure



**Table 4 Women's preferences during childbirth**

| Variables                                               |     | Pre-intervention<br>n (%) | Post-intervention<br>n (%) | p-value<br>for $\chi^2$ |
|---------------------------------------------------------|-----|---------------------------|----------------------------|-------------------------|
| Woman wanted to have birth companion in the labour ward | Yes | 86 (43.7)                 | 34 (17.9)                  | <0.001                  |
|                                                         | No  | 111 (56.5)                | 156 (82.1)                 |                         |
| Woman wanted to move around during birth                | Yes | 57 (28.8)                 | 67 (35.5)                  | 0.16                    |
|                                                         | No  | 141 (71.1)                | 122 (64.5)                 |                         |
| Woman wanted to have food or fluids during birth        | Yes | 70 (35.4)                 | 63 (33.2)                  | 0.65                    |
|                                                         | No  | 128 (64.6)                | 127 (66.8)                 |                         |
| Woman had a preferred birthing position                 | Yes | 69 (34.9)                 | 36 (19.1)                  | <0.001                  |
|                                                         | No  | 129 (65.1)                | 153 (80.9)                 |                         |
| Woman wanted to have cultural practice in labour        | Yes | 43 (21.7)                 | 17 (8.9)                   | 0.001                   |
|                                                         | No  | 155 (78.3)                | 173 (91.1)                 |                         |

\*a participant can have more than one procedure

**Table 5 Multilevel mixed-effects regression of counts of mistreatment experienced by women**

| Variables                                              | Model I<br>$\beta$ (95% CI) | Model II<br>$\beta$ (95% CI) | Model III<br>$\beta$ (95% CI) |
|--------------------------------------------------------|-----------------------------|------------------------------|-------------------------------|
| <b>A) Fixed effects</b>                                |                             |                              |                               |
| (Intercept)                                            | 4.32 (3.60, 5.12)           | <b>4.82 (3.98, 5.84)*</b>    | 7.18 (3.34, 15.44)            |
| <b>Intervention group</b>                              |                             |                              |                               |
| Pre-intervention                                       |                             | Ref.                         | Ref.                          |
| Post-intervention                                      |                             | <b>0.79 (0.72, 0.87)*</b>    | <b>0.82 (0.74, 0.91)*</b>     |
| <b>Place of residence</b>                              |                             |                              |                               |
| Urban                                                  |                             |                              | Ref.                          |
| Rural                                                  |                             |                              | 1.05 (0.93, 1.19)             |
| <b>Age in completed year</b>                           |                             |                              |                               |
| 15-24                                                  |                             |                              | Ref.                          |
| 25-34                                                  |                             |                              | 0.95 (0.82, 1.09)             |
| 35-44                                                  |                             |                              | 0.81 (0.61, 1.08)             |
| <b>Age at first pregnancy</b>                          |                             |                              | 1.01 (0.99, 1.03)             |
| <b>Marital status</b>                                  |                             |                              |                               |
| Single                                                 |                             |                              | Ref.                          |
| Married                                                |                             |                              | 0.79 (0.45, 1.39)             |
| Separated                                              |                             |                              | 1.06 (0.49, 2.31)             |
| <b>Religion</b>                                        |                             |                              |                               |
| Christian Protestant                                   |                             |                              | Ref.                          |
| Christian Orthodox                                     |                             |                              | 0.93 (0.76, 1.12)             |
| Christian Catholic                                     |                             |                              | 1.01 (0.73, 1.40)             |
| Muslim                                                 |                             |                              | 1.07 (0.88, 1.31)             |
| Others                                                 |                             |                              | 0.80 (0.60, 1.07)             |
| <b>Ethnicity</b>                                       |                             |                              |                               |
| Sidama                                                 |                             |                              | Ref.                          |
| Oromo                                                  |                             |                              | 0.93 (0.72, 1.19)             |
| Amhara                                                 |                             |                              | 0.98 (0.77, 1.25)             |
| Wolayita                                               |                             |                              | 1.13 (0.92, 1.40)             |
| Others                                                 |                             |                              | 1.00 (0.81, 1.24)             |
| <b>Educational level</b>                               |                             |                              |                               |
| No formal education                                    |                             |                              | Ref.                          |
| Primary education                                      |                             |                              | 0.99 (0.84, 1.15)             |
| Secondary education                                    |                             |                              | 0.98 (0.81, 1.18)             |
| College and above                                      |                             |                              | 1.07 (0.84, 1.38)             |
| <b>Occupation</b>                                      |                             |                              |                               |
| Housewife                                              |                             |                              | Ref.                          |
| Private employee                                       |                             |                              | 1.06 (0.77, 1.47)             |
| Government employee                                    |                             |                              | 0.95 (0.72, 1.25)             |
| Private business                                       |                             |                              | 1.01 (0.80, 1.27)             |
| Others                                                 |                             |                              | 0.90 (0.69, 1.16)             |
| <b>Has regular monthly income*</b>                     |                             |                              |                               |
| No                                                     |                             |                              | Ref.                          |
| Yes                                                    |                             |                              | 0.92 (0.75, 1.13)             |
| <b>Total number of deliveries</b>                      |                             |                              |                               |
| One                                                    |                             |                              | Ref.                          |
| Two or more                                            |                             |                              | 0.86 (0.74, 1.02)             |
| <b>Antenatal visit during index pregnancy</b>          |                             |                              |                               |
| No                                                     |                             |                              | Ref.                          |
| Yes                                                    |                             |                              | 0.95 (0.74, 1.22)             |
| <b>Experienced complication during index pregnancy</b> |                             |                              |                               |
| No                                                     |                             |                              | Ref.                          |
| Yes                                                    |                             |                              | <b>1.17 (1.01, 1.34)</b>      |
| <b>Experienced complication during index delivery</b>  |                             |                              |                               |
| No                                                     |                             |                              | Ref.                          |

|    |                                              |                   |                   |                           |
|----|----------------------------------------------|-------------------|-------------------|---------------------------|
| 1  | Yes                                          |                   |                   | <b>1.16 (1.03, 1.32)*</b> |
| 2  | <b>Referral status on admission</b>          |                   |                   |                           |
| 3  | Referred                                     |                   |                   | Ref.                      |
| 4  | Non-referred                                 |                   |                   | 1.07 (0.94, 1.21)         |
| 5  | <b>Total hours of stay</b>                   |                   |                   | 1.00 (0.99, 1.00)         |
| 6  | <b>Gender of main service provider</b>       |                   |                   |                           |
| 7  | Female                                       |                   |                   | Ref.                      |
| 8  | Male                                         |                   |                   | 1.03 (0.93, 1.16)         |
| 9  | <b>Type of delivery</b>                      |                   |                   |                           |
| 10 | Vaginal delivery                             |                   |                   | Ref.                      |
| 11 | Caesarean after trial of vaginal delivery    |                   |                   | <b>0.76 (0.63, 0.92)*</b> |
| 12 | Caesarean without trial of vaginal delivery  |                   |                   | <b>0.68 (0.47, 0.98)*</b> |
| 13 | <b>Had intervention for vaginal delivery</b> |                   |                   |                           |
| 14 | No                                           |                   |                   | Ref.                      |
| 15 | Yes                                          |                   |                   | 1.04 (0.91, 1.19)         |
| 16 | <b>B) Random effects</b>                     |                   |                   |                           |
| 17 | Hospital                                     |                   |                   |                           |
| 18 | Variance                                     | 0.02 (0.01-0.14)* | 0.03 (0.01-0.14)* | 0.01 (0.001-0.08)*        |
| 19 | ICC (%)                                      | 12.3              | 13.6              | 9.0                       |
| 20 | <b>C) Model fitness</b>                      |                   |                   |                           |
| 21 | AIC                                          | 1600              | 1577              | 1570                      |
| 22 | Log Likelihood                               | -798              | -786              | -750                      |
| 23 | P value                                      | -                 | < 0.001           | < 0.001                   |

• Significant at  $p < .05$

Abbreviations:  $\beta$  exponentiated regression coefficient, **CI** confidence interval, **ICC** Intraclass correlation, **AIC** Akaike's information criterion

Supplementary file 1: Wall posters

Respectful maternity care: The universal rights of childbearing women

In seeking and receiving maternity care before, during and after childbirth:

**1** EVERY WOMAN HAS THE RIGHT TO **BE FREE FROM HARM AND ILL TREATMENT**  
NO ONE CAN PHYSICALLY ABUSE YOU

**2** EVERY WOMAN HAS THE RIGHT TO **INFORMATION, INFORMED CONSENT AND REFUSAL, AND RESPECT FOR HER CHOICES AND PREFERENCES, INCLUDING COMPANIONSHIP DURING MATERNITY CARE**  
NO ONE CAN FORCE YOU OR DO THINGS TO YOU WITHOUT YOUR KNOWLEDGE AND CONSENT

**3** EVERY WOMAN HAS THE RIGHT TO **PRIVACY AND CONFIDENTIALITY**  
NO ONE CAN EXPOSE YOU OR YOUR PERSONAL INFORMATION

**4** EVERY WOMAN HAS THE RIGHT TO **BE TREATED WITH DIGNITY AND RESPECT**  
NO ONE CAN HUMILIATE OR VERBALLY ABUSE YOU

**5** EVERY WOMAN HAS THE RIGHT TO **EQUALITY, FREEDOM FROM DISCRIMINATION, AND EQUITABLE CARE**  
NO ONE CAN DISCRIMINATE BECAUSE OF SOMETHING THEY DO NOT LIKE ABOUT YOU

**6** EVERY WOMAN HAS THE RIGHT TO **HEALTHCARE AND TO THE HIGHEST ATTAINABLE LEVEL OF HEALTH**  
NO ONE CAN PREVENT YOU FROM GETTING THE MATERNITY CARE YOU NEED

**7** EVERY WOMAN HAS THE RIGHT TO **LIBERTY, AUTONOMY, SELF-DETERMINATION, AND FREEDOM FROM COERCION**  
NO ONE CAN DETAIN YOU OR YOUR BABY WITHOUT LEGAL AUTHORITY

Safe Motherhood is more than the prevention of death and disability...It is respect for every woman's humanity, feelings, choices, and preferences.

**RESPECTFUL MATERNITY CARE: THE UNIVERSAL RIGHTS OF CHILDBEARING WOMEN**

**Disrespect and abuse during maternity care are a violation of women's basic human rights.**

All rights are grounded in established international human rights instruments, including the Universal Declaration of Human Rights; the Universal Declaration on Bioethics and Human Rights; the International Covenant on Economic, Social and Cultural Rights; the International Covenant on Civil and Political Rights; the Convention on the Elimination of All Forms of Discrimination Against Women; the Declaration of the Elimination of Violence Against Women; the Report of the Office of the United Nations High Commissioner for Human Rights on preventable maternal mortality and morbidity and human rights; and the United Nations Fourth World Conference on Women, Beijing. National instruments are also referenced if they make specific mention of childbearing women.

**RESPECTFUL MATERNITY CARE**  
DON'T ASK US: TELL US: KNOW YOUR RIGHTS

**The White Ribbon Alliance**  
For Safe Motherhood

For more information visit:  
[www.whiteribbonalliance.org/respectfulcare](http://www.whiteribbonalliance.org/respectfulcare)

## Infographics for a positive childbirth experience

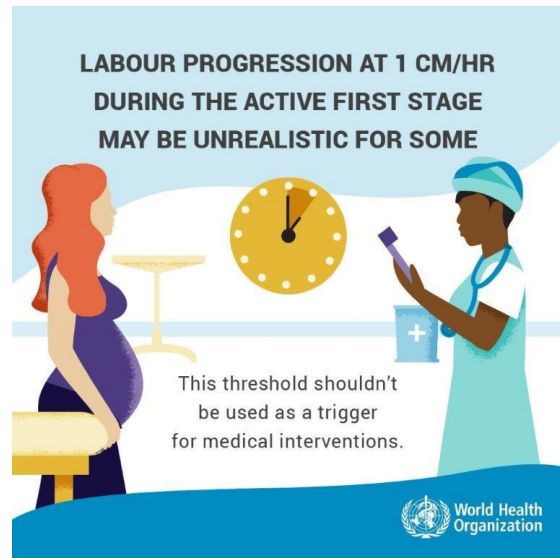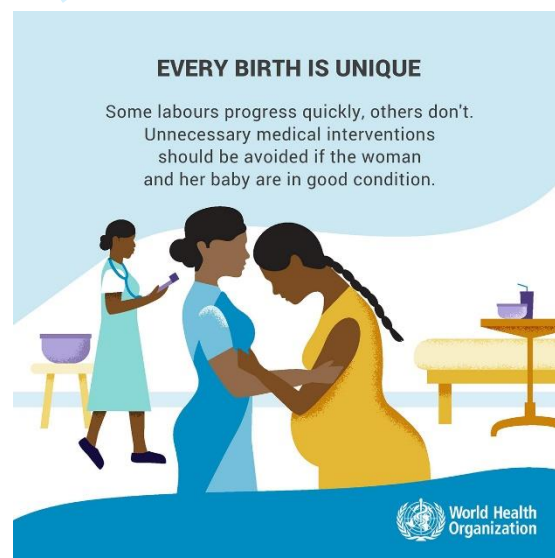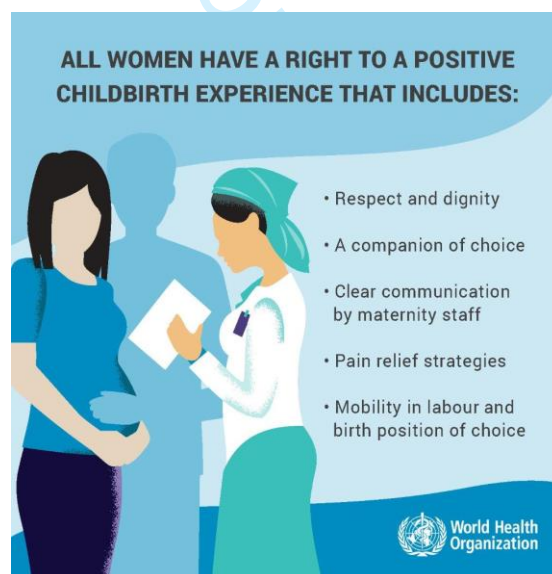

# The universal rights of childbearing women endorsed by the Federal Ministry of Health, Ethiopia (Amharic version)

## ርህራሄ እና አክብሮት የተሞላበት የጤና አገልግሎት ማግኘት

### የሁሉም እናቶች መብት ነው!!

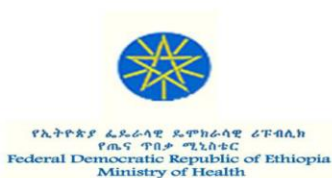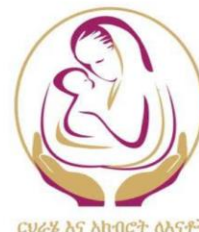

#### I. ርህራሄ እና አክብሮት የተሞላበት የጤና አገልግሎት ምን ማለት ነው?

ይህ ፅንሰ-ሀሳብ ተገልጋይን ያማከለ የጤና አገልግሎት፣ የስነ-ምግባር መርሆችን (የእናቶች ነፃነት፣ ክብር፣ ስሜት፣ ምርጫዎች)፣ ሰብዓዊ መብትን፣ እንዲሁም የእናት-የዋናና የጨቅላ ህፃኑን ፍላጎት ግምት ውስጥ ባስገባ መልኩ ለእናቶች እና ጨቅላ ህፃናት ጤና አገልግሎት መስጠትን ያጠቃልላል።

#### በወላድ እናቶች ላይ የሚደርስ ርህራሄ እና አክብሮት የጎደለው አገልግሎት የሚገለፅባቸው መንገዶች

- **አካላዊ ጥቃት፡** መምታት፣ መገፍተር ወይም እናቶችን ርህራሄ በጎደለው መልክ አካላዊ ምርመራ ማድረግ
- **አክብሮት የጎደለው ክብካቤ፡** የእናቶችን ክብር የሚያዋርድ ቃል፣ ተግባር እና ሌሎች ከቃል ውጭ ያሉ የመግባብያ መንገዶችን መጠቀም፣ የእናቶችን በነፃ ሀሳብ የመግለፅ መብት መንፈግ እና በምርመራ ጊዜ ለእናቶችን ምቹ ሁኔታዎችን አለማድረግ
- **በፈቃደኝነት ላይ ያልተመሰረተ ክብካቤ፡** በሚደረጉ ምርመራዎችና ህክምናዎች ዙርያ እናቶች ሊረዱት በሚችሉት ቋንቋ እና ደረጃ በቂ ገለፃ አለመስጠት እና በራሳቸው ውሳኔ ላይ እንዲደርሱ አለመርዳት
- **ምስጢራዊነቱ ያልተጠበቀ ክብካቤ፡** ምስጢራዊነቱ ያልተጠበቀ የምክር አገልግሎት፣ የአካል ምርመራና ህክምና ማድረግ፣ የእናቶችን የህክምና እና የግል መረጃ በሚሰጥ አለመጠበቅ፣ እናትና ጨቅላ ህፃን አንድ ላይ እንዲሆኑ አለመፍቀድ/አለማድረግ
- **አድሎ ማድረግ፡** በእናቶች ብሄር፣ ባህል፣ ኢኮኖሚ እና ትምህርት ደረጃ ምክንያት የሚሰጣቸው ክብካቤ ላይ አድሎ ማድረግ
- **እናቶች ማግኘት የሚገባቸውን ክብካቤ መከልከል/መላ በመላ አለመስጠት፡** እናቶችን በወሊድ/በምጥ ጊዜ እና ከወለዱ በኋላ ባሉት ሰዓታት ብቻቸውን መተው እና እርዳታ ቢያስፈልጋቸው እንኳ እንደት ሊያገኙ እንደሚችሉ መረጃ አለመስጠት። በወሊድ/በምጥ ጊዜ እና ከወለዱ በኋላ ባሉት ጊዜያት የሚመርጡት አጋር ለምሳሌ የቤተሰብ አባል፣ የልምድ አዋላጅ የመሳሰሉት አብረዋቸው እንዲሆኑ አለመፍቀድ።
- **እናቶችን እና የወለዱትን ጨቅላ ህፃን በጤና ተቋማት ማግኘት፡** በተለያዩ ምክንያት ለምሳሌ ከአገልግሎት ክፍያ ጋር በተያያዘ ሳይከፍሉ እንዳይወጡ መያዝ የካትታል።

1  
2  
3 **II. ለሁሉም በመውለድ እድሜ ክልል ላሉ ሴቶች የተሰጠ የቅድመ ወሊድ የወሊድና የድህረ ወሊድ ጤና**  
4 **ክብካቤና አገልግሎት የማግኘት አለም አቀፍ ሰብአዊ መብት :- ርህራሄ እና አክብሮት የተሞላበት**  
5 **የጤና አገልግሎት**

6  
7  
8 **አንቀፅ I:** ማንኛውም ሴት ኢ-ሰብአዊ ከሆነ ወይም ክብሯን ከሚያዋርድ አያያዝ ወይም ጥቃት የመጠበቅ መብት  
9 አላት። ማንም ሰው አካላዊ ጥቃት ሊያደርስብሽ አይችልም።

10  
11 **አንቀፅ II:** ማንኛውም ሴት መረጃ የማግኘት፣ በወሊድ ጊዜ አብሯት የሚሆን ሰው መምረጥን ጨምሮ በሚሰጣት  
12 ክብካቤና ህክምና ላይ በእውቀት ላይ የተመሰረተ የመሰማማት ወይም ያለመሰማማት መብት ያላት ሲሆን  
13 ምርጫዋም ሊከበርላት ይገባል። ማንም ሰው ያለ ፍቃድሽ በሃይል ሊያስገድድሽ አይችልም።

14  
15  
16 **አንቀፅ III:** ማንኛውም ሴት የግል ህይወቷ ግላዊነቷ እንዲሁም ሚስጥሯን የመጠበቅ መብት አላት። ማንም ሰው  
17 ሊያጋልጥሽ ወይም ሚስጥሯን ሊያወጣ አይችልም።

18  
19  
20 **አንቀፅ IV:** ማንኛውም ሴት ሰብአዊ ክብሯን መልካም ስሟ የመጠበቅ መብት አላት። ማንም ሰው ሊያዋርድሽ ወይም  
21 የቃላት ጥቃት ሊያደርስብሽ አይችልም።

22  
23  
24 **አንቀፅ V:** ማንኛውም ሴት የዘር፣ የሃይማኖት፣ የብሄር፣ የሀብት፣ በፖለቲካ፣ በማህበራዊ አመጣጥ፣ በትውልድ ወይም  
25 በሌላ አቋም ልዩነት እና መድልዎ ሳይደረግበት በእኩል የመታከም መብት አላት። ማንም ሰው ስላንቺ  
26 ያልወደደው ነገር ቢኖር ሊያገልሽ ወይም መድልዎ ሊያደርግብሽ አይችልም ።

27  
28  
29 **አንቀፅ VI:** ማንኛውም ሴት ጤንነቷ ተጠብቆ የመኖርና የጤና ክብካቤ የማግኘት መብት አላት። ማንም ሰው የቅድመ  
30 ወሊድ የወሊድና የድህረ ወሊድ ጤና ክብካቤና አገልግሎት ከማግኘት ሊያግድሽ አይችልም።

31  
32  
33 **አንቀፅ VII:** ማንኛውም ሴት የነጻነት፣ ራስን በራስ የማስተዳደር፣ የራስን ዕድል በራስ የመወሰን ብሎም ያለመገደድ  
34 መብት አላት። ማንም ሰው በህግ ስልጣን ሳይኖረው ወይም በህግ ከተደነገገው አንቺን ወይም ልጅሽን  
35 ሊይዝ ወይም ሊያቆይ አይችልም።

36  
37  
38 **“ርህራሄ እና አክብሮት የተሞላበት የጤና አገልግሎት ለጤናማ**  
39 **እናትነት”**

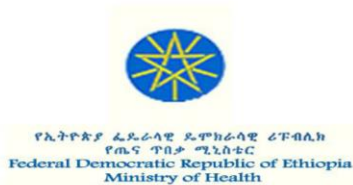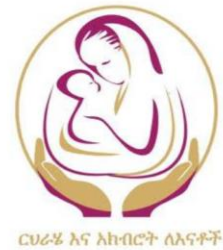

## Supplementary file 2

## Facility-led respectful maternity care assessment checklist for continuous quality improvement

| RMC standards                                    | Measurement criteria                                         |                                                                                                                                  | NA | Remark |
|--------------------------------------------------|--------------------------------------------------------------|----------------------------------------------------------------------------------------------------------------------------------|----|--------|
|                                                  | <b>O: observation; I: interview; RD: review of documents</b> |                                                                                                                                  |    |        |
| The woman is protected from verbal abuse         | <input type="checkbox"/>                                     | 1. Uses polite language, avoids use of harsh or rude language <b>(O)</b>                                                         |    |        |
|                                                  | <input type="checkbox"/>                                     | 2. Does not make judgmental or accusatory comments <b>(O)</b>                                                                    |    |        |
|                                                  | <input type="checkbox"/>                                     | 3. Does not make threats to withhold treatment <b>(O)</b>                                                                        |    |        |
|                                                  | <input type="checkbox"/>                                     | 4. Does not blame a woman for any feature of her birth outcome/s <b>(O)</b>                                                      |    |        |
| Score                                            | of ____                                                      |                                                                                                                                  |    |        |
| The woman is protected from physical abuse       | <input type="checkbox"/>                                     | 1. Does not beat, slap, kick, or pinch a woman <b>(O)</b>                                                                        |    |        |
|                                                  | <input type="checkbox"/>                                     | 2. Does not deny a woman to cry or scream during labor <b>(O)</b>                                                                |    |        |
|                                                  | <input type="checkbox"/>                                     | 3. Does not restrain (tie) a woman <b>(O)</b>                                                                                    |    |        |
| Score                                            | of ____                                                      |                                                                                                                                  |    |        |
| The woman is not stigmatized or discriminated    | <input type="checkbox"/>                                     | 1. Serves a woman respectfully regardless of her religion/race/ethnicity/age/socioeconomic status/medical condition <b>(O/I)</b> |    |        |
|                                                  | <input type="checkbox"/>                                     | 2. Serves a woman respectfully regardless of her medical condition <b>(O/I)</b>                                                  |    |        |
| Score                                            | of ____                                                      |                                                                                                                                  |    |        |
| The woman received professional standard of care | <input type="checkbox"/>                                     | 1. Seeks for woman's consent prior to performing any procedure <b>(O)</b>                                                        |    |        |
|                                                  | <input type="checkbox"/>                                     | 2. Never shouts loudly when communicating woman's information to other staff <b>(O/I)</b>                                        |    |        |
|                                                  | <input type="checkbox"/>                                     | 3. Keeps woman's personal information secure <b>(O/I/RD)</b>                                                                     |    |        |
|                                                  | <input type="checkbox"/>                                     | 4. Performs vaginal examination very gently to minimize pain <b>(O/I)</b>                                                        |    |        |
|                                                  | <input type="checkbox"/>                                     | 5. Maintains woman's privacy while performing vaginal examination <b>(O/I)</b>                                                   |    |        |
|                                                  | <input type="checkbox"/>                                     | 6. Gives a woman pain relief when she needs it <b>(O/I)</b>                                                                      |    |        |
|                                                  | <input type="checkbox"/>                                     | 7. Obtains woman's consent before preparing her for surgery <b>(O/I)</b>                                                         |    |        |
|                                                  | <input type="checkbox"/>                                     | 8. Responds to a woman immediately following her call <b>(O/I)</b>                                                               |    |        |
|                                                  | <input type="checkbox"/>                                     | 9. Never leaves a woman alone during labour <b>(O/I)</b>                                                                         |    |        |
| Score                                            | of ____                                                      |                                                                                                                                  |    |        |
|                                                  | <input type="checkbox"/>                                     | 1. Introduces himself/herself to a woman when he/she first meet her <b>(I/O)</b>                                                 |    |        |



1  
2  
3  
4  
5  
6  
7  
8  
9  
10  
11  
12  
13  
14  
15  
16  
17  
18  
19  
20  
21  
22  
23  
24  
25  
26  
27  
28  
29  
30  
31  
32  
33  
34  
35  
36  
37  
38  
39  
40  
41  
42  
43  
44  
45  
46  
47

|                                                                      |                          |                                                                                                      |  |  |
|----------------------------------------------------------------------|--------------------------|------------------------------------------------------------------------------------------------------|--|--|
| The woman received care with good provider rapport and communication | <input type="checkbox"/> | 2. Serves a woman in a polite manner <b>(I/O)</b>                                                    |  |  |
|                                                                      | <input type="checkbox"/> | 3. Does not ignore woman's concern/s while she is in labor <b>(I/O)</b>                              |  |  |
|                                                                      | <input type="checkbox"/> | 4. Speaks to a woman in a clear language <b>(I/O)</b>                                                |  |  |
|                                                                      | <input type="checkbox"/> | 5. Gives a woman periodic updates of progress of labor <b>(O/I)</b>                                  |  |  |
|                                                                      | <input type="checkbox"/> | 6. Gives credit to every effort a woman makes in labor <b>(O/I)</b>                                  |  |  |
|                                                                      | <input type="checkbox"/> | 7. Allows a woman to move around during labor unless there is an indication to deny her <b>(O/I)</b> |  |  |
|                                                                      | <input type="checkbox"/> | 8. Allows a woman to take food or fluids if there is no other indication to deny her <b>(I/O)</b>    |  |  |
|                                                                      | <input type="checkbox"/> | 9. Allows woman's birth companions for companionship <b>(I/O)</b>                                    |  |  |
|                                                                      | <input type="checkbox"/> | 10. Allows a woman to assume position of her choice during labor <b>(I/O)</b>                        |  |  |
|                                                                      | <input type="checkbox"/> | 11. Allows a woman any cultural practice she wants to practice in labor <b>(I/O)</b>                 |  |  |
|                                                                      | <input type="checkbox"/> | 12. Does not objectify a woman in labor <b>(I/O)</b>                                                 |  |  |
|                                                                      | <input type="checkbox"/> | 13. Does not make a woman stay in the hospital without her will <b>(I/O)</b>                         |  |  |
|                                                                      | <input type="checkbox"/> | 14. Keeps a baby with his mom unless there is another indication <b>(O/I)</b>                        |  |  |
|                                                                      | Score                    | ___ of ___                                                                                           |  |  |
| Grand score                                                          | ___ of ___               |                                                                                                      |  |  |

NA: Not applicable

**Action plan matrix to improve respectful maternity care**

| Indicator (intended target) | Possible cause (key causes) | Action taken (test action) | Responsible person | Support required | Timeline (dd/mm/yy) | Evaluate/ lesson learned (study) | Action for the next cycle                                                                           |
|-----------------------------|-----------------------------|----------------------------|--------------------|------------------|---------------------|----------------------------------|-----------------------------------------------------------------------------------------------------|
| I:<br><br>T:                | C1:<br><br>C2:              |                            |                    |                  |                     |                                  | <input type="checkbox"/> Modify<br><input type="checkbox"/> Expand<br><input type="checkbox"/> Drop |
|                             |                             |                            |                    |                  |                     |                                  |                                                                                                     |
|                             |                             |                            |                    |                  |                     |                                  |                                                                                                     |
|                             |                             |                            |                    |                  |                     |                                  |                                                                                                     |
|                             |                             |                            |                    |                  |                     |                                  |                                                                                                     |
|                             |                             |                            |                    |                  |                     |                                  |                                                                                                     |
|                             |                             |                            |                    |                  |                     |                                  |                                                                                                     |
|                             |                             |                            |                    |                  |                     |                                  |                                                                                                     |
|                             |                             |                            |                    |                  |                     |                                  |                                                                                                     |
|                             |                             |                            |                    |                  |                     |                                  |                                                                                                     |

## Supplementary file 3: Order of studies and timing of data collection

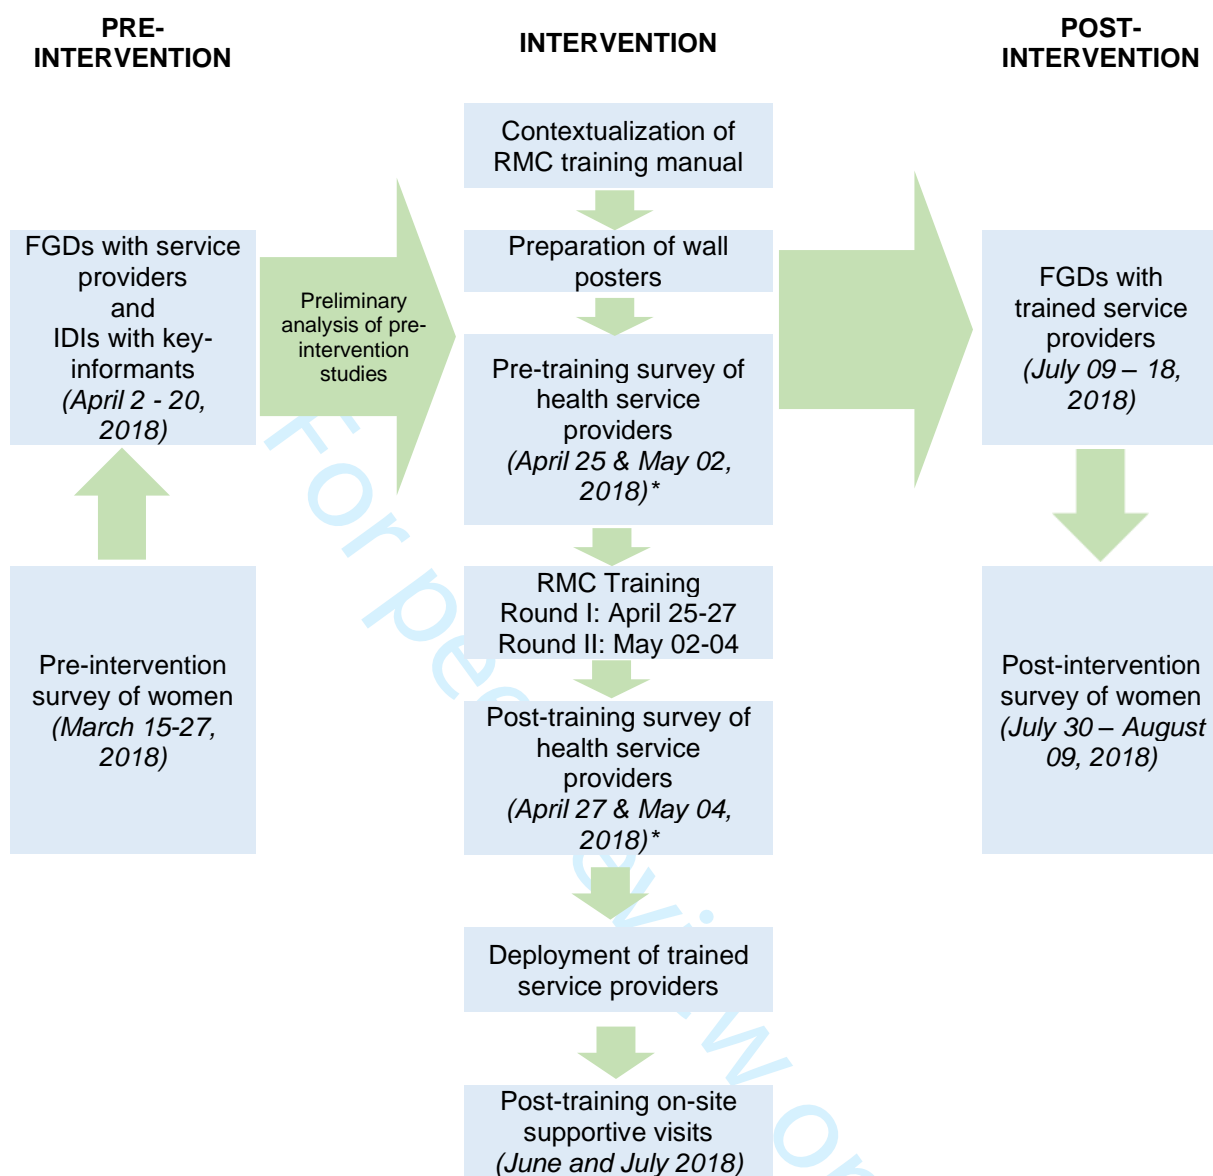

RMC-respectful maternity care

\*RMC training was conducted in two rounds from 25-27 April 2018 and 02-04 May 2018.

The post intervention FGDs and the post-intervention survey of women providers were conducted after the intervention has been completed

# Reporting checklist for quality improvement study.

Based on the SQUIRE guidelines.

## Instructions to authors

Complete this checklist by entering the page numbers from your manuscript where readers will find each of the items listed below.

Your article may not currently address all the items on the checklist. Please modify your text to include the missing information. If you are certain that an item does not apply, please write "n/a" and provide a short explanation.

Upload your completed checklist as an extra file when you submit to a journal.

In your methods section, say that you used the SQUIRE reporting guidelines, and cite them as:

Ogrinc G, Davies L, Goodman D, Batalden P, Davidoff F, Stevens D. SQUIRE 2.0 (Standards for Quality Improvement Reporting Excellence): revised publication guidelines from a detailed consensus process

|                    | Reporting Item                                                                                                                                                                                                         | Page Number |
|--------------------|------------------------------------------------------------------------------------------------------------------------------------------------------------------------------------------------------------------------|-------------|
| <b>Title</b>       |                                                                                                                                                                                                                        |             |
| <a href="#">#1</a> | Indicate that the manuscript concerns an initiative to improve healthcare (broadly defined to include the quality, safety, effectiveness, patientcenteredness, timeliness, cost, efficiency, and equity of healthcare) | 1           |

## Abstract

[#02a](#) Provide adequate information to aid in searching and indexing 2

[#02b](#) Summarize all key information from various sections of the text using the abstract format of the intended publication or a structured summary such as: background, local problem, methods, interventions, results, conclusions 2

## Introduction

[#3](#) Nature and significance of the local problem description 4

[#4](#) Summary of what is currently known about the problem, including relevant previous studies 4,5,6

[#5](#) Informal or formal frameworks, models, concepts, and / or theories used to explain the problem, any reasons or assumptions that were used to develop the intervention(s), and reasons why the intervention(s) was expected to work 5,6

[#6](#) Purpose of the project and of this report 6

## Methods

[#7](#) Contextual elements considered important at the outset of introducing the intervention(s) 7

[#08a](#) Description of the intervention(s) in sufficient detail that others could reproduce it 7,8,9

|    |                 |                      |                                                                   |          |
|----|-----------------|----------------------|-------------------------------------------------------------------|----------|
| 1  | Intervention(s) | <a href="#">#08b</a> | Specifics of the team involved in the work                        | 8,9      |
| 2  |                 |                      |                                                                   |          |
| 3  |                 |                      |                                                                   |          |
| 4  | Study of the    | <a href="#">#09a</a> | Approach chosen for assessing the impact of the                   | 10,11,12 |
| 5  |                 |                      |                                                                   |          |
| 6  | Intervention(s) |                      | intervention(s)                                                   |          |
| 7  |                 |                      |                                                                   |          |
| 8  |                 |                      |                                                                   |          |
| 9  |                 |                      |                                                                   |          |
| 10 | Study of the    | <a href="#">#09b</a> | Approach used to establish whether the observed                   | 12       |
| 11 |                 |                      |                                                                   |          |
| 12 | Intervention(s) |                      | outcomes were due to the intervention(s)                          |          |
| 13 |                 |                      |                                                                   |          |
| 14 |                 |                      |                                                                   |          |
| 15 | Measures        | <a href="#">#10a</a> | Measures chosen for studying processes and outcomes of            | 10,11    |
| 16 |                 |                      |                                                                   |          |
| 17 |                 |                      | the intervention(s), including rationale for choosing them,       |          |
| 18 |                 |                      |                                                                   |          |
| 19 |                 |                      | their operational definitions, and their validity and reliability |          |
| 20 |                 |                      |                                                                   |          |
| 21 |                 |                      |                                                                   |          |
| 22 |                 |                      |                                                                   |          |
| 23 | Measures        | <a href="#">#10b</a> | Description of the approach to the ongoing assessment of          | NA       |
| 24 |                 |                      |                                                                   |          |
| 25 |                 |                      | contextual elements that contributed to the success,              |          |
| 26 |                 |                      |                                                                   |          |
| 27 |                 |                      | failure, efficiency, and cost                                     |          |
| 28 |                 |                      |                                                                   |          |
| 29 |                 |                      |                                                                   |          |
| 30 | Measures        | <a href="#">#10c</a> | Methods employed for assessing completeness and                   | 11,12    |
| 31 |                 |                      |                                                                   |          |
| 32 |                 |                      | accuracy of data                                                  |          |
| 33 |                 |                      |                                                                   |          |
| 34 |                 |                      |                                                                   |          |
| 35 |                 |                      |                                                                   |          |
| 36 | Analysis        | <a href="#">#11a</a> | Qualitative and quantitative methods used to draw                 | 12       |
| 37 |                 |                      |                                                                   |          |
| 38 |                 |                      | inferences from the data                                          |          |
| 39 |                 |                      |                                                                   |          |
| 40 |                 |                      |                                                                   |          |
| 41 | Analysis        | <a href="#">#11b</a> | Methods for understanding variation within the data,              | 12       |
| 42 |                 |                      |                                                                   |          |
| 43 |                 |                      | including the effects of time as a variable                       |          |
| 44 |                 |                      |                                                                   |          |
| 45 |                 |                      |                                                                   |          |
| 46 | Ethical         | <a href="#">#12</a>  | Ethical aspects of implementing and studying the                  | 23       |
| 47 |                 |                      |                                                                   |          |
| 48 | considerations  |                      | intervention(s) and how they were addressed, including,           |          |
| 49 |                 |                      |                                                                   |          |
| 50 |                 |                      | but not limited to, formal ethics review and potential            |          |
| 51 |                 |                      |                                                                   |          |
| 52 |                 |                      | conflict(s) of interest                                           |          |
| 53 |                 |                      |                                                                   |          |
| 54 |                 |                      |                                                                   |          |
| 55 |                 |                      |                                                                   |          |
| 56 | <b>Results</b>  |                      |                                                                   |          |
| 57 |                 |                      |                                                                   |          |
| 58 |                 |                      |                                                                   |          |
| 59 |                 |                      |                                                                   |          |
| 60 |                 |                      |                                                                   |          |

|    |                   |                      |                                                                 |             |
|----|-------------------|----------------------|-----------------------------------------------------------------|-------------|
| 1  |                   | <a href="#">#13a</a> | Initial steps of the intervention(s) and their evolution over   | 27; Supp.   |
| 2  |                   |                      |                                                                 |             |
| 3  |                   |                      | time (e.g., time-line diagram, flow chart, or table), including | file 6      |
| 4  |                   |                      |                                                                 |             |
| 5  |                   |                      | modifications made to the intervention during the project       |             |
| 6  |                   |                      |                                                                 |             |
| 7  |                   |                      |                                                                 |             |
| 8  |                   |                      |                                                                 |             |
| 9  |                   | <a href="#">#13b</a> | Details of the process measures and outcome                     | 14,15,16,17 |
| 10 |                   |                      |                                                                 |             |
| 11 |                   |                      |                                                                 |             |
| 12 |                   | <a href="#">#13c</a> | Contextual elements that interacted with the intervention(s)    | 16,17       |
| 13 |                   |                      |                                                                 |             |
| 14 |                   |                      |                                                                 |             |
| 15 |                   | <a href="#">#13d</a> | Observed associations between outcomes, interventions,          | 16,17       |
| 16 |                   |                      |                                                                 |             |
| 17 |                   |                      | and relevant contextual elements                                |             |
| 18 |                   |                      |                                                                 |             |
| 19 |                   |                      |                                                                 |             |
| 20 |                   | <a href="#">#13e</a> | Unintended consequences such as unexpected benefits,            | NA          |
| 21 |                   |                      |                                                                 |             |
| 22 |                   |                      | problems, failures, or costs associated with the                |             |
| 23 |                   |                      |                                                                 |             |
| 24 |                   |                      | intervention(s).                                                |             |
| 25 |                   |                      |                                                                 |             |
| 26 |                   |                      |                                                                 |             |
| 27 |                   |                      |                                                                 |             |
| 28 |                   | <a href="#">#13f</a> | Details about missing data                                      | NA          |
| 29 |                   |                      |                                                                 |             |
| 30 |                   |                      |                                                                 |             |
| 31 | <b>Discussion</b> |                      |                                                                 |             |
| 32 |                   |                      |                                                                 |             |
| 33 |                   |                      |                                                                 |             |
| 34 | Summary           | <a href="#">#14a</a> | Key findings, including relevance to the rationale and          | 17          |
| 35 |                   |                      |                                                                 |             |
| 36 |                   |                      | specific aims                                                   |             |
| 37 |                   |                      |                                                                 |             |
| 38 |                   |                      |                                                                 |             |
| 39 | Summary           | <a href="#">#14b</a> | Particular strengths of the project                             | 17,20       |
| 40 |                   |                      |                                                                 |             |
| 41 |                   |                      |                                                                 |             |
| 42 |                   |                      |                                                                 |             |
| 43 | Interpretation    | <a href="#">#15a</a> | Nature of the association between the intervention(s) and       | 17,18       |
| 44 |                   |                      |                                                                 |             |
| 45 |                   |                      | the outcomes                                                    |             |
| 46 |                   |                      |                                                                 |             |
| 47 |                   |                      |                                                                 |             |
| 48 | Interpretation    | <a href="#">#15b</a> | Comparison of results with findings from other publications     | 17-20       |
| 49 |                   |                      |                                                                 |             |
| 50 |                   |                      |                                                                 |             |
| 51 | Interpretation    | <a href="#">#15c</a> | Impact of the project on people and systems                     | 18-20       |
| 52 |                   |                      |                                                                 |             |
| 53 |                   |                      |                                                                 |             |
| 54 | Interpretation    | <a href="#">#15d</a> | Reasons for any differences between observed and                | 18,19       |
| 55 |                   |                      |                                                                 |             |
| 56 |                   |                      | anticipated outcomes, including the influence of context        |             |
| 57 |                   |                      |                                                                 |             |
| 58 |                   |                      |                                                                 |             |
| 59 |                   |                      |                                                                 |             |
| 60 |                   |                      |                                                                 |             |

|    |                    |                      |                                                              |       |
|----|--------------------|----------------------|--------------------------------------------------------------|-------|
| 1  | Interpretation     | <a href="#">#15e</a> | Costs and strategic trade-offs, including opportunity costs  | NA    |
| 2  |                    |                      |                                                              |       |
| 3  |                    |                      |                                                              |       |
| 4  | Limitations        | <a href="#">#16a</a> | Limits to the generalizability of the work                   | 21    |
| 5  |                    |                      |                                                              |       |
| 6  |                    |                      |                                                              |       |
| 7  | Limitations        | <a href="#">#16b</a> | Factors that might have limited internal validity such as    | 21    |
| 8  |                    |                      | confounding, bias, or imprecision in the design, methods,    |       |
| 9  |                    |                      | measurement, or analysis                                     |       |
| 10 |                    |                      |                                                              |       |
| 11 |                    |                      |                                                              |       |
| 12 |                    |                      |                                                              |       |
| 13 |                    |                      |                                                              |       |
| 14 |                    |                      |                                                              |       |
| 15 | Limitations        | <a href="#">#16c</a> | Efforts made to minimize and adjust for limitations          | 21    |
| 16 |                    |                      |                                                              |       |
| 17 |                    |                      |                                                              |       |
| 18 | Conclusion         | <a href="#">#17a</a> | Usefulness of the work                                       | 21,22 |
| 19 |                    |                      |                                                              |       |
| 20 |                    |                      |                                                              |       |
| 21 | Conclusion         | <a href="#">#17b</a> | Sustainability                                               | 21,22 |
| 22 |                    |                      |                                                              |       |
| 23 |                    |                      |                                                              |       |
| 24 | Conclusion         | <a href="#">#17c</a> | Potential for spread to other contexts                       | 21,22 |
| 25 |                    |                      |                                                              |       |
| 26 |                    |                      |                                                              |       |
| 27 | Conclusion         | <a href="#">#17d</a> | Implications for practice and for further study in the field | 21,22 |
| 28 |                    |                      |                                                              |       |
| 29 |                    |                      |                                                              |       |
| 30 | Conclusion         | <a href="#">#17e</a> | Suggested next steps                                         | 22    |
| 31 |                    |                      |                                                              |       |
| 32 |                    |                      |                                                              |       |
| 33 |                    |                      |                                                              |       |
| 34 | <b>Other</b>       |                      |                                                              |       |
| 35 |                    |                      |                                                              |       |
| 36 | <b>information</b> |                      |                                                              |       |
| 37 |                    |                      |                                                              |       |
| 38 |                    |                      |                                                              |       |
| 39 | Funding            | <a href="#">#18</a>  | Sources of funding that supported this work. Role, if any,   | 22    |
| 40 |                    |                      | of the funding organization in the design, implementation,   |       |
| 41 |                    |                      | interpretation, and reporting                                |       |
| 42 |                    |                      |                                                              |       |
| 43 |                    |                      |                                                              |       |
| 44 |                    |                      |                                                              |       |
| 45 |                    |                      |                                                              |       |
| 46 |                    |                      |                                                              |       |

None The SQUIRE 2.0 checklist is distributed under the terms of the Creative Commons Attribution License CC BY-NC 4.0. This checklist can be completed online using <https://www.goodreports.org/>, a tool made by the [EQUATOR Network](#) in collaboration with [Penelope.ai](#)



# BMJ Open

## Mitigating the mistreatment of childbearing women: Evaluation of respectful maternity care intervention in Ethiopian hospitals

|                                 |                                                                                                                                                                                                                                                                                                                                                                                                                                                                                                                                                                                                                                                  |
|---------------------------------|--------------------------------------------------------------------------------------------------------------------------------------------------------------------------------------------------------------------------------------------------------------------------------------------------------------------------------------------------------------------------------------------------------------------------------------------------------------------------------------------------------------------------------------------------------------------------------------------------------------------------------------------------|
| Journal:                        | <i>BMJ Open</i>                                                                                                                                                                                                                                                                                                                                                                                                                                                                                                                                                                                                                                  |
| Manuscript ID                   | bmjopen-2020-038871.R1                                                                                                                                                                                                                                                                                                                                                                                                                                                                                                                                                                                                                           |
| Article Type:                   | Original research                                                                                                                                                                                                                                                                                                                                                                                                                                                                                                                                                                                                                                |
| Date Submitted by the Author:   | 24-Jun-2020                                                                                                                                                                                                                                                                                                                                                                                                                                                                                                                                                                                                                                      |
| Complete List of Authors:       | Asefa, Anteneh; Hawassa University College of Medicine and Health Sciences, School of Public Health ; The University of Melbourne Nossal Institute for Global Health<br>Morgan, Alison; The University of Melbourne Nossal Institute for Global Health<br>Gebremedhin, Samson; Addis Ababa University College of Health Sciences, School of Public Health<br>Lemango , Ephrem; Federal Ministry of Health , Maternal and Child Health Directorate<br>Abebe, Sintayehu; Amref Health Africa in Ethiopia<br>Magge, Hema; Institute for Healthcare Improvement<br>Kermode, Michelle; The University of Melbourne Nossal Institute for Global Health |
| <b>Primary Subject Heading</b>: | Health services research                                                                                                                                                                                                                                                                                                                                                                                                                                                                                                                                                                                                                         |
| Secondary Subject Heading:      | Public health                                                                                                                                                                                                                                                                                                                                                                                                                                                                                                                                                                                                                                    |
| Keywords:                       | Clinical audit < HEALTH SERVICES ADMINISTRATION & MANAGEMENT, Quality in health care < HEALTH SERVICES ADMINISTRATION & MANAGEMENT, PUBLIC HEALTH                                                                                                                                                                                                                                                                                                                                                                                                                                                                                                |
|                                 |                                                                                                                                                                                                                                                                                                                                                                                                                                                                                                                                                                                                                                                  |

SCHOLARONE™  
Manuscripts



I, the Submitting Author has the right to grant and does grant on behalf of all authors of the Work (as defined in the below author licence), an exclusive licence and/or a non-exclusive licence for contributions from authors who are: i) UK Crown employees; ii) where BMJ has agreed a CC-BY licence shall apply, and/or iii) in accordance with the terms applicable for US Federal Government officers or employees acting as part of their official duties; on a worldwide, perpetual, irrevocable, royalty-free basis to BMJ Publishing Group Ltd ("BMJ") its licensees and where the relevant Journal is co-owned by BMJ to the co-owners of the Journal, to publish the Work in this journal and any other BMJ products and to exploit all rights, as set out in our [licence](#).

The Submitting Author accepts and understands that any supply made under these terms is made by BMJ to the Submitting Author unless you are acting as an employee on behalf of your employer or a postgraduate student of an affiliated institution which is paying any applicable article publishing charge ("APC") for Open Access articles. Where the Submitting Author wishes to make the Work available on an Open Access basis (and intends to pay the relevant APC), the terms of reuse of such Open Access shall be governed by a Creative Commons licence – details of these licences and which [Creative Commons](#) licence will apply to this Work are set out in our licence referred to above.

Other than as permitted in any relevant BMJ Author's Self Archiving Policies, I confirm this Work has not been accepted for publication elsewhere, is not being considered for publication elsewhere and does not duplicate material already published. I confirm all authors consent to publication of this Work and authorise the granting of this licence.

1 Mitigating the mistreatment of childbearing women: Evaluation of respectful maternity care  
2 intervention in Ethiopian hospitals  
3

4 Anteneh Asefa\*, Alison Morgan, Samson Gebremedhin, Ephrem Tekle Lemango, Sintayehu  
5 Abebe, Hema Magge, Michelle Kermode  
6  
7

8  
9 \*Corresponding author

10 Anteneh Asefa

- 11 • School of Public Health, College of Medicine and Health Sciences, Hawassa University,  
12 Hawassa, Ethiopia; [antex98@yahoo.com](mailto:antex98@yahoo.com)
- 13 • Nossal Institute for Global Health, School of Population and Global Health, University of  
14 Melbourne, Melbourne, Australia

15  
16 Co-authors

17 Alison Morgan

- 18 • Nossal Institute for Global Health, School of Population and Global Health, University of  
19 Melbourne, Melbourne, Australia; [alison.morgan@unimelb.edu.au](mailto:alison.morgan@unimelb.edu.au)

20 Samson Gebremedhin

- 21 • School of Public Health, College of Medicine and Health Sciences, Addis Ababa  
22 University, Addis Ababa, Ethiopia; [samsongmgs@yahoo.com](mailto:samsongmgs@yahoo.com)

23 Ephrem Tekle

- 24 • Maternal and Child Health Directorate, Ministry of Health, Federal Democratic Republic  
25 of Ethiopia, Addis Ababa, Ethiopia; [eplemango@gmail.com](mailto:eplemango@gmail.com)

26 Sintayehu Abebe

- 27 • Amref Health Africa in Ethiopia, Addis Ababa, Ethiopia; [sintayehumoh@gmail.com](mailto:sintayehumoh@gmail.com)

28 Hema Magge

- 29 • Institute for Healthcare Improvement, Boston, MA, USA; [hmagge@ihi.org](mailto:hmagge@ihi.org)
- 30 • Division of Global Health Equity, Brigham and Women's Hospital, Boston, MA, USA
- 31 • Division of General Pediatrics, Boston Children's Hospital, Boston, MA, USA

32 Michelle Kermode

- 33 • Nossal Institute for Global Health, School of Population and Global Health, University of  
34 Melbourne, Melbourne, Australia; [mkermode@unimelb.edu.au](mailto:mkermode@unimelb.edu.au)

## Abstract

**Objectives:** There is a lack of evidence on approaches to mitigating mistreatment during facility-based childbirth. This study compares the experiences of mistreatment reported by childbearing women before and after implementation of a respectful maternity care intervention.

**Design:** A pre-post study design was undertaken to quantify changes in women's experiences of mistreatment during facility-based childbirth before and after the respectful maternity care intervention.

**Intervention:** A respectful maternity care intervention was implemented in three hospitals in southern Ethiopia between December 2017 and September 2018 and it included training of service providers, placement of wall posters in labour rooms, and post-training supportive visits for quality improvement.

**Outcome measures:** A 25-item questionnaire asking women about mistreatment experiences was administered to 388 women (198 in the pre-intervention, 190 in the post-intervention). The outcome variable was the number of mistreatment components experienced by women, expressed as a score out of 25. Multilevel mixed-effects Poisson modelling was used to assess the change in mistreatment score from pre-to post-intervention periods.

**Results:** The number of mistreatment components experienced by women was reduced by 18% when the post-intervention group was compared with the pre-intervention group (adjusted regression coefficient ( $A\beta$ )=0.82, 95%CI: 0.74-0.91). Women who had a complication during pregnancy ( $A\beta$ =1.17, 95%CI: 1.01-1.34) and delivery ( $A\beta$ =1.16, 95%CI: 1.03-1.32) experienced a greater number of mistreatment components. On the other hand, women who delivered by caesarean delivery after trial of vaginal delivery ( $A\beta$ =0.76, 95%CI: 0.63-0.92) and caesarean delivery without trial of vaginal delivery ( $A\beta$ =0.68, 95%CI: 0.47-0.98) experienced a lesser number of mistreatment components compared to those who had vaginal delivery.

1 **Conclusions:** Women reported significantly fewer mistreatment experiences during childbirth  
2 following implementation of the intervention. Given the variety of factors that lead to  
3 mistreatment in health facilities, interventions designed to mitigate mistreatment need to involve  
4 structural changes.  
5  
6  
7  
8

9 **Keywords:** mistreatment, respectful maternity care, intervention, pre-intervention, post-  
10 intervention  
11  
12  
13

### 14 **Strengths and limitations of this study**

- 16 • This is the first study to test the effectiveness of a respectful maternity care intervention  
17 in Ethiopia.
- 18 • Comparing the counts of mistreatment components captures the diversity of  
19 mistreatment that would not have been possible by simple prevalence measures.  
20
- 21 • Treating hospitals as random-effects controls for the impact of other interventions that  
22 may have happened around the same time in those facilities.  
23
- 24 • Mistreatment components experienced by women were assessed using binary options  
25 (yes/no) questions which ignore multiple incidents of a mistreatment component.  
26
- 27 • An exit survey of women is prone to recall bias in acquiring data on multiple incidents of  
28 mistreatment that would have been minimised by labour observation.  
29  
30  
31  
32  
33  
34  
35  
36  
37  
38  
39  
40  
41  
42  
43  
44  
45  
46  
47  
48  
49  
50  
51  
52  
53  
54  
55  
56  
57  
58  
59  
60

## Introduction

Despite the remarkable decline in maternal mortality worldwide, around 800 women die each day due to preventable conditions that emerge in the course of pregnancy and childbirth.<sup>1</sup>

According to the World Health Organization's (WHO) estimates, 295,000 maternal deaths occurred in 2017, of which 4.7% occurred in Ethiopia.<sup>1</sup> Low utilization of maternal health care services, especially care during childbirth, is a key challenge to reducing maternal mortality.<sup>2,3</sup>

In 2019, only 47.5% of women delivered in health facilities in Ethiopia.<sup>4</sup>

Women's negative experiences and/or other women's negative experiences of facility-based childbirth are commonly reported reasons for not attending a health facility at the time of delivery.<sup>5-8</sup> These experiences include hostile or insensitive staff<sup>7</sup>, disallowance of birth companions<sup>6,7</sup>, disrespectful care<sup>9-11</sup>, women's lack of autonomy<sup>8</sup>, poor reception at health facilities<sup>6</sup>, lack of privacy<sup>6,7</sup>, unfriendly staff<sup>12</sup>, abusive care<sup>12</sup>, and poor readiness of health facilities.<sup>12</sup> The attitudes, actions and system barriers that contribute to such negative experiences are nowadays labelled as mistreatment or disrespect and abuse. However, an internationally agreed definition of mistreatment or disrespect and abuse still lacks as behaviours that are acceptable to women in some contexts may be unacceptable to women in different contexts.

There is compelling evidence from many countries on the negative impact of mistreatment on the uptake of facility-based childbirth. An evidence synthesis of studies from 16 low and middle-income countries (LMICs) and China revealed that mistreatment during childbirth is a powerful deterrent to facility-based childbirth.<sup>13</sup> Additionally, studies from Afghanistan<sup>14</sup>, Bolivia<sup>15</sup>, Ghana<sup>16</sup>, Kenya<sup>17,18</sup>, Tanzania<sup>19</sup>, Malawi<sup>20</sup>, and India<sup>21</sup> have clearly reported disrespectful care at birth as a key deterrent to facility-based childbirth.

The body of knowledge on mistreatment is still emerging and evolving, hence methodological approaches to estimate levels of mistreatment differ across settings, thereby making comparison challenging.<sup>22,23</sup> Prevalence studies conducted in different parts of Ethiopia

1 between 2013 and 2017 report many examples of mistreatment ranging from non-consented  
2 care, non-confidential care, discriminatory care, abandonment of care, non-dignified care, to  
3 physical abuse during facility-based childbirth.<sup>24-28</sup>  
4

5  
6  
7 The 2014 WHO statement, which condemns all forms of mistreatment during facility-based  
8 childbirth, identifies five actions to prevent and eliminate mistreatment globally. The statement  
9 calls for: evidence synthesis on the effectiveness of interventions that aim to improve respectful  
10 maternity care and thereby mitigate mistreatment, defining and measuring mistreatment, and  
11 inculcating service providers with the culture of respectful care at the time of birth.<sup>29</sup> Following  
12 this, various studies, including a multi-country study led by WHO, have been conducted to  
13 review and synthesize methodological frameworks for research on mistreatment.<sup>13, 22, 23, 30-32</sup>  
14  
15 However, implementation research to assess the effectiveness of interventions to halt  
16 mistreatment have not been reported in Ethiopia.  
17  
18  
19  
20  
21  
22  
23  
24  
25  
26

27 In the move towards mitigating mistreatment, a focus on respectful maternity care is growing  
28 globally, and the 'Universal Rights of Childbearing Women' has been endorsed in several  
29 countries.<sup>33</sup> WHO defines respectful maternity care as "the care organized for and provided to  
30 all women in a manner that maintains their dignity, privacy and confidentiality, ensures freedom  
31 from harm and mistreatment, and enables informed choice and continuous support during  
32 labour and childbirth".<sup>34</sup>  
33  
34  
35  
36  
37  
38  
39

40 With the aim of meeting the maternal mortality targets of the Sustainable Development Goals  
41 (SDG), strategies for ending preventable maternal mortality were introduced in 2015. The  
42 strategy calls for health systems not to neglect respectful maternity care while endeavouring to  
43 deliver effective clinical interventions.<sup>35</sup> WHO's framework for quality maternal and newborn  
44 health care reinforces the important role of respectful maternity care, and identifies respect and  
45 preservation of dignity as one of the eight domains of quality of care.<sup>36</sup> Additionally, in 2018,  
46 WHO released guidelines for a positive childbirth experience which recommend respectful  
47 maternity care throughout labour and birth for all women.<sup>34</sup> A recent WHO paper published in  
48  
49  
50  
51  
52  
53  
54  
55  
56  
57  
58  
59  
60

1 The Lancet that found high levels of mistreatment in four countries also highlighted the need for  
2 an urgent action to promote the provision of respectful maternity care worldwide.<sup>37</sup>  
3  
4

5 The government of Ethiopia launched a national movement entitled “the caring, respectful, and  
6 compassionate (CRC) health workforce” in 2016. The initiative is one of the four health sector  
7 transformation agendas aiming to achieve health targets set for the five years between 2015/16  
8 – 2020/21.<sup>38</sup> However, respectful maternity care initiatives are in early-stage development and  
9 currently limited to a few pilot health facilities and technically supported by international partner  
10 organizations. Consequently, there is an evidence gap regarding implementation of effective  
11 respectful maternity care interventions in the country.  
12  
13  
14  
15  
16  
17  
18  
19  
20

21 This study was undertaken to assess women’s experiences of mistreatment during facility-  
22 based childbirth before and after implementation of an intervention that was designed to  
23 improve the quality of care women receive during childbirth in hospitals. Previous respectful  
24 maternity care intervention studies from Kenya<sup>39</sup> and Tanzania<sup>40, 41</sup> revealed a significant  
25 reduction in the level of mistreatment and an improved attitude of service providers towards  
26 women, as a consequence of the interventions. This study is part of a broader interventional  
27 mixed methods study that aimed to identify health system challenges to the implementation of  
28 RMC and potential solutions to address these challenges. Lessons drawn from the respectful  
29 maternity care training and its implementation (Asefa et al. Lessons learned through respectful  
30 maternity care training and its implementation in Ethiopia: An interventional mixed methods  
31 study) and health system constraints to the promotion of respectful maternity care in Ethiopian  
32 hospitals (Asefa et al. Imagining maternity care as a complex adaptive system: understanding  
33 health system constraints to the promotion of respectful maternity care) are reported elsewhere.  
34  
35  
36  
37  
38  
39  
40  
41  
42  
43  
44  
45  
46  
47  
48  
49  
50  
51  
52  
53  
54  
55  
56  
57  
58  
59  
60



## Materials and methods

### Study setting

This study was undertaken in three hospitals located in the Southern Nations Nationalities and Peoples Region (SNNPR), Ethiopia. Health services in Ethiopia are organized in three tiers: health posts, health centres, and primary hospitals are in the first tier; the second tier consists of general hospitals; and the third tier, specialized hospitals.<sup>38</sup> In principle, general hospitals are designed to serve a catchment population of 1-1.5 million people whereas primary hospitals are expected to serve 60,000 - 100,000 people. One of the study hospitals, Leku, is a primary hospital reported to be serving a catchment population of 261,271 including an estimated 8000 women who give birth each year. The other two hospitals, Adare and Yirgalem, are general hospitals serving a catchment population of 359,358 and 267,589, respectively. An estimated 10,000 and 9,000 pregnant women give birth each year in the catchments of Adare and Yirgalem hospitals, respectively. The hospitals were selected purposively taking into consideration their geographical proximity and their varying level in the tiers of the Ethiopian health system. The intervention involved only these three hospitals. None of hospitals have a private labour ward or birthing room which means that several women labour in the same room and give birth in one birthing room.

### Study design

This study is part of a mixed-methods implementation research study that was conducted to identify health system constraints to the promotion of respectful maternity care and to develop and assess mitigation approaches. A pre-post study that involved no comparison group was undertaken between December 2017 and September 2018 to quantify changes in women's experiences of mistreatment during facility-based childbirth. Women who delivered in the study hospitals were surveyed at the time of discharge; the pre-intervention surveys were conducted in March 2018, whereas the post-intervention surveys were conducted in July and August 2018.

### Description of the intervention

1 The intervention included: training of service providers, placement of wall posters in labour  
2 rooms, and post-training supportive visits for quality improvement. Each of these are described  
3 below.  
4  
5

6  
7 The training of service providers involved a three-day workshop using a respectful maternity  
8 care training manual developed for this intervention. The manual was drafted by maternal health  
9 researchers from Ethiopia and Australia after review of previous respectful maternity care  
10 training manuals designed for low-income settings (Kenya<sup>42</sup>, Tanzania<sup>43</sup>, and Nigeria<sup>44</sup>),  
11 international human rights declarations<sup>33, 45, 46</sup>, national professional codes of ethics, and  
12 national training manuals on maternity care and quality improvement. The manual includes an  
13 overview of maternal health in Ethiopia. It covers topics such as human rights and law in the  
14 context of reproductive health, respectful maternity care rights and standards, professional  
15 ethics, and continuous quality improvement. The draft manual was reviewed by three senior  
16 maternal health experts at the Federal Ministry of Health and SNNPR Health Bureau for its  
17 content and applicability in the Ethiopian context. Two rounds of three-day respectful maternity  
18 care training sessions were conducted at Hawassa University Comprehensive Specialized  
19 Teaching Hospital. The training was interactive and deployed various teaching methods  
20 including presentations, role plays, demonstrations, case studies, individual readings, video  
21 shows, and a hospital visit. Training sessions were facilitated by the principal investigator, a  
22 senior maternal health expert from the SNNPR health bureau, and a senior obstetrician-  
23 gynaecologist. A total of 64 health service providers participated in the training, 33 in the first  
24 round and 31 in the second round (all were staff from the participating hospitals). Fifty-two were  
25 midwives, whereas the remaining were integrated emergency surgical officers (4), general  
26 practitioners (3), nurses (3), and health officers (2). The SNNPR health bureau and hospital  
27 administrations communicated their expectation that all service providers at the participating  
28 hospitals who assist women during childbirth should attend the training. In reality, all eligible  
29 service providers from Adare (26) and Leku (21) hospitals attended the training sessions. Five  
30  
31  
32  
33  
34  
35  
36  
37  
38  
39  
40  
41  
42  
43  
44  
45  
46  
47  
48  
49  
50  
51  
52  
53  
54  
55  
56  
57  
58  
59  
60

1 among the 22 eligible service providers from Yirgalem hospital did not attend the training  
2 sessions for personal reasons.  
3

4  
5 Five types of wall posters (four in English and one in Amharic) were distributed to the hospitals  
6 following completion of the service provider training. The posters were displayed in labour wards  
7 and waiting rooms to serve as job aids for service providers who are trained in English to  
8 become health professionals and who generally use service guidelines and reporting formats  
9 prepared in English. One of the English version wall posters lists the universal rights of  
10 childbearing women prepared by the White Ribbon Alliance.<sup>33</sup> The remaining three are  
11 infographics taken from the intrapartum care for a positive childbirth experience guideline  
12 prepared by the World Health Organization.<sup>34</sup> The Amharic version poster described the  
13 manifestations of mistreatment during facility-based childbirth and the universal rights of  
14 childbearing women endorsed by the Federal Ministry of Health, Ethiopia.  
15  
16  
17  
18  
19  
20  
21  
22  
23  
24  
25  
26

27 Two rounds of post-training quality improvement supportive supervision visits were conducted  
28 by the principal investigator and a senior maternal health expert in all hospitals at two-week  
29 intervals, in June and July of 2018. During the initial visit, a facility-led assessment of maternity  
30 care settings was conducted using a structured checklist that was part of the health providers'  
31 training [Supplementary file 1]. The checklist included 32 respectful maternity care standards  
32 that were assessed using observation, interview, and review of documents; the standards were  
33 grouped into five categories. Action plans were developed by service providers to address  
34 actionable gaps identified by the respectful maternity care standards assessment. The gaps that  
35 could not be addressed at the labour ward level were passed to hospital administrators for  
36 further actions [Supplementary file 1]. During the second visit, similar steps were undertaken to  
37 see changes as a result of the initial action plan and promote continuous quality improvement  
38 as a routine process. Detailed information on the sequencing of the interventions and the timing  
39 of data collection for the broader study, including the current study, is appended [Supplementary  
40 file 2].  
41  
42  
43  
44  
45  
46  
47  
48  
49  
50  
51  
52  
53  
54  
55  
56  
57  
58  
59  
60

## Participants and procedures

Pregnant women who gave birth in the study hospitals were eligible for inclusion in the study regardless of their mode of delivery (natural or operative) or birth outcome. Once women had completed their discharge requirements and procedures, they were invited to participate in the study and were consecutively enrolled until the required sample size was achieved for each study hospital.

## Sample size and sampling

Stata 14 software was used to calculate the sample size for this study using the menu option for determining the difference between two sample means with the assumption of: an anticipated mean count of mistreatment experiences women face in facility-based childbirth (pre-intervention) of 4.91, taken from a study conducted in Addis Ababa<sup>26</sup>; an anticipated mean count of mistreatment experiences women face in facility-based childbirth (post-intervention) of 3.96 (mean difference of 0.95); statistical power of 90%; an allocation ratio of 1:1 between the pre and post-intervention groups; 0.05 level of significance; and 10% non-response rate.

Additionally, women receiving care in the same hospital are more likely to receive comparable care during childbirth, so the sample size was adjusted for clustering by assuming a clustering effect of 2. With these assumptions, the minimum required sample size was calculated to be 378 (189 in the pre-intervention group and 189 in the post-intervention group). Eventually, 392 women were invited and 388 women were surveyed (190 in the pre-intervention and 198 in the post-intervention) making the response rate 98.9%; rushing to go home and lack of interest to participate were the reasons for non-participation. Allocation of samples to the three hospitals was made proportionately depending on the number of women who delivered in the hospitals in the last quarter of 2017 for the pre-intervention survey, and the second quarter of 2018 for the post-intervention survey. Accordingly, 172 (87 pre-intervention, 85 post-intervention) women were surveyed from Adare hospital, whereas 86 (46 pre-intervention, 40 post-intervention) and 130 (65 pre-intervention, 65 post-intervention) were from Leku and Yirgalem hospitals,

1 respectively. Eligible women were enrolled into the study consecutively until the required  
2 sample size was met.  
3

#### 4 **Variables and outcome measures**

5 The survey included 25 questions about women's experiences of childbirth in the study  
6 hospitals (Table 1). The questions pertained to six categories: verbal abuse; physical abuse;  
7 non-consented care; lack of information, privacy and confidentiality; neglect and discrimination;  
8 and refusal of preference. The responses consisted of dichotomised mutually exclusive options  
9 set as "yes" or "no". The outcome variable was a count variable computed from the 25 variables  
10 clustered into the categories mentioned above; the number of mistreatment components women  
11 experienced were counted as a score out of 25; maximum possible score being 25 and  
12 minimum 0.  
13  
14  
15  
16  
17  
18  
19  
20  
21  
22  
23

24 The main independent variable of the study was whether the woman belongs to the pre-  
25 intervention group or the post-intervention group, i.e. whether she was hospitalised before or  
26 after the intervention. The other independent variables, i.e. potential confounders that were  
27 considered for adjustment were: sociodemographic (place of residence, age, age at first  
28 marriage, marital status, educational status, occupation, religion, ethnicity, monthly income,  
29 number of children); obstetric characteristics (complication/s during pregnancy and delivery,  
30 type of delivery, intervention/s for vaginal delivery); service utilisation history (antenatal visits,  
31 history of facility-based delivery); service-related (referral status, time of admission, hours of  
32 stay, gender of service provider)  
33  
34  
35  
36  
37  
38  
39  
40  
41  
42  
43

#### 44 **Questionnaire development**

45 The survey questionnaire was developed as per the recommendations of a comparative  
46 analysis of five prevalence studies of mistreatment that were conducted in sub-Saharan Africa  
47 countries, including Ethiopia.<sup>22</sup> Additionally, the typology suggested by a mixed-methods  
48 systematic review on mistreatment during facility-based childbirth<sup>23</sup> was used to refine and  
49 group the 25 questions with some modifications. The questionnaire was originally prepared in  
50  
51  
52  
53  
54  
55  
56  
57  
58  
59  
60

1 English and later translated into both Amharic and Sidamu Afo languages and back-translated  
2 to check for consistency [Supplementary file 3]. Subsequently, an electronic data collection  
3 template was prepared using the KoBoToolbox tool, and data collection was made using the  
4 KoBoCollect app for android devices.  
5  
6  
7

### 8 9 **Data collection**

10 Data were collected by trained nurses and midwives who were fluent speakers of both Amharic  
11 and Sidamu Afo languages, recruited from Hawassa University Comprehensive Specialized  
12 Hospital. Data collectors received detailed three-day training on the purpose of the study,  
13 contents of the questionnaire and effective and ethical survey administration. The questionnaire  
14 was pre-tested on 15 women who delivered in Hawassa University Comprehensive Specialized  
15 Hospital which resulted in minor modifications to the questionnaire. Before conducting the post-  
16 intervention survey, data collectors received a one-day refresher training. To ensure data  
17 quality, the supervisor reviewed completed questionnaires for key contents before they were  
18 uploaded from the tablets to the server; the principal investigator cross-checked all uploaded  
19 questionnaires for consistency and completeness.  
20  
21  
22  
23  
24  
25  
26  
27  
28  
29  
30  
31

### 32 33 **Data management and analysis**

34 Data were exported to SPSS V.24 software for cleaning and later to StataSE v.15 software for  
35 analysis. The outcome variable, number of mistreatment components women experienced, was  
36 confirmed to follow the Poisson distribution by using a one sample independent Kolmogorov-  
37 Smirnov test ( $p = 0.97$ ). Additionally, the mean (4.40) and variance (4.14) of the outcome  
38 variable were found to be close and thus suitable for Poisson modelling. Three models were  
39 constructed in this study: a null (intercept-only) model with the intercept as a fixed effect and  
40 random effects for hospitals (model I); a model containing the intervention as a fixed effect and  
41 random effects for hospitals (model II); and a model containing the intervention,  
42 sociodemographic, obstetric, and health service-related factors as fixed effects and random  
43 effects for hospitals (model III). The independent variables were checked for multicollinearity  
44 using the variance inflation factor (VIF). Hospital was set as a random-effects variable in all  
45  
46  
47  
48  
49  
50  
51  
52  
53  
54  
55  
56  
57  
58  
59  
60

1 models to take into account the likely absence of independence among women who received  
2 care from the same hospital. Analysis results from model III are reported in this study. A  
3  
4 multilevel mixed effects Poisson regression analysis was conducted to identify the association  
5  
6 between the independent and outcome variables while adjusting for possible confounders. The  
7  
8 fixed effects (association measures) and random effects (variation measures) for the number of  
9  
10 mistreatment components experienced are reported. Adjusted exponentiated regression  
11  
12 coefficients ( $\beta$ ) with their corresponding 95% confidence intervals (CI) were used to estimate the  
13  
14 level of association between independent variables and the outcome variable. For comparison  
15  
16 purpose, we also ran a fixed effects model with robust standard errors which included hospitals  
17  
18 along with other variables of model III as fixed effects.  
19  
20  
21

### 22 **Patient involvement**

23  
24 Women who gave birth in the study hospitals during the survey periods were involved in the  
25  
26 study. These women were not involved in research design, tool development, data analysis, and  
27  
28 reporting.  
29  
30  
31

### 32 **Results**

#### 33 **Demographics**

34  
35 Among the 388 women who participated in the study (198 pre-intervention, 190 post-  
36  
37 intervention), there was no difference in the distribution of place of residence, age, age at first  
38  
39 marriage, educational level, marital status, religion and ethnicity between the two groups (Table  
40  
41 2). Illiteracy and having a regular monthly income were higher in the post-intervention group.  
42  
43 More than two thirds (70.1%) of women in the post-intervention group were housewives  
44  
45 compared to 51% in the pre-intervention group,  $p < .001$  (Table 2).  
46  
47  
48  
49

#### 50 **Obstetric characteristics**

51  
52 More than half of the participants in the pre-intervention (55.6%) and post-intervention (51.6%)  
53  
54 groups were multiparous (Table 3). The majority of women delivered their previous child at a  
55  
56  
57  
58  
59  
60

1 health institution, 75.2% in the pre-intervention and 70.1% in the post-intervention group.  
2  
3 Comparable levels of women in both groups had antenatal visits during their index pregnancy;  
4  
5 however, having three or more antenatal visits was higher among women in the pre-intervention  
6  
7 survey (82.4% vs 71.2%;  $p=.04$ ). Complications during the index pregnancy were reported by  
8  
9 17.2% of women in the pre-intervention group and 10% in the post-intervention group ( $p=.04$ ).  
10  
11 Compared to women in the pre-intervention group, women in the post-intervention group were  
12  
13 less likely to have had a vaginal delivery (77.4% vs 87.9%,  $p=.01$ ) or an intervened vaginal  
14  
15 delivery (39.5% vs 46.4%,  $p=.15$ ) (Table 3).  
16  
17

### 18 **Service characteristics**

19  
20 There was no difference between the pre- and post-intervention groups with respect to referral  
21  
22 status and time of admission (Table 3). On the other hand, a higher proportion (52.5%) of  
23  
24 women in the pre-intervention group delivered during the night-time than their counterparts  
25  
26 (42.6%),  $p=.05$ . More than three-fifths (61.1%) of women in the pre-intervention group were  
27  
28 assisted mainly by female service providers (51.6% in post-intervention group,  $p=.06$ ) (Table 3).  
29  
30

### 31 **Preference during childbirth**

32  
33 There were 86 (43.7%) women in the pre-intervention group who wanted to have a birth  
34  
35 companion in the labour ward, while the proportion was only 17.9% in the post-intervention  
36  
37 group ( $p<.001$ ). Among those women who wanted to have a birth companion in the pre-  
38  
39 intervention group, 14% were afraid to ask service providers to have one (23.5% in the post-  
40  
41 intervention group). A higher proportion of women in the pre-intervention group wanted to adopt  
42  
43 a preferred birthing position (34.9% vs 19.1%,  $p<.001$ ) and cultural practice in the labour ward  
44  
45 (21.7% vs 8.9%,  $p=.001$ ). Additionally, more than half (51.2%) of women who wanted to have  
46  
47 cultural practice in the pre-intervention group were afraid to ask service providers to have the  
48  
49 practice (47.1% in the post-intervention group). The proportion of women who wanted to move  
50  
51 around during birth and who wanted to have food or fluids during birth did not vary significantly  
52  
53 between the two groups (Table 3).  
54  
55  
56  
57  
58  
59  
60



## Experiences of mistreatment

Almost all women (99.5% pre-intervention vs 99% post-intervention group) reported experiencing at least one type of mistreatment. The number of mistreatment types experienced ranged from one to 12 in the pre-intervention group (median = 5), and one to 11 in the post-intervention group (median = 3.5).

When the pre-intervention and post-intervention groups are compared, a number of improvements are evident. Vaginal examination was performed without permission for 47.9% of the women in post-intervention group; 64.7% in pre-intervention group ( $p=.001$ ) (Table 1).

Additionally, seeking women's consent before procedures, and the practice of allowing birth companions improved post-intervention. On the other hand, some aspects of mistreatment such as the use of harsh or rude language against women, gagging women, and leaving women for a prolonged period of time without attention did not improve significantly following the staff training. Additionally, more than two-thirds (67.9%) of women in the post-intervention group claimed that service providers did not give periodic updates on their labour (52.5% in the pre-intervention survey;  $p=.002$ ) (Table 1).

We also compared the proportion of women who had encountered mistreatment grouped by six categories (verbal abuse; physical abuse; non-consented care; lack of information, privacy and confidentiality; neglect and discrimination; and refusal of preference). Women who reported having experienced at least one type of mistreatment in a given category were regarded as mistreated in that category. The level of non-consented care measured after the intervention (65.3%) is lower than before the intervention (83.3%),  $p<.001$  (Table 1). Similarly, experiences of physical abuse and refusal of preference showed improvement after the intervention. No significant difference was detected in the level of the remaining three categories of mistreatment (Table 1).

## Factors associated with the number of mistreatment components experienced

1 In the bivariate analysis, the number of mistreatment components experienced was higher  
2 among women who had a complication during the index delivery ( $C\beta = 1.16$ , 95%CI: 1.05-1.30)  
3 and an intervention for vaginal delivery ( $C\beta = 1.31$ , 95%CI: 1.20-1.44) (Table 4). Women who  
4 gave birth in Yirgalem hospital also experienced a higher number of mistreatment components  
5 ( $C\beta = 1.36$ , 95%CI: 1.22-1.51) compared to those who gave birth in Adare hospital. In contrast,  
6 the number of mistreatment components experienced was lower among women who had two or  
7 more deliveries and women who had a caesarean delivery (Table 4).  
8  
9  
10  
11  
12  
13  
14  
15

### 16 **Multilevel analysis of changes in reported components of mistreatment**

17 Outputs of the intercept-only model (model I) showed that there was significant variation  
18 between hospitals in the number of components of mistreatment experienced by women (Table  
19 4). The intraclass correlation coefficient (ICC) of model I also revealed that 12.3% of the  
20 variation in the number of components of mistreatment experienced by women is attributable to  
21 differences across hospitals. Model II, a model with the main independent variable (intervention  
22 group), was different and fit as compared to model I ( $p$  for likelihood ratio (LR) test < 0.001).  
23 Furthermore, model III (a model that includes all the independent variables and the intervention  
24 group) was different and fit as compared to model II ( $p$  for LR test < 0.001). The ICC of model III  
25 shows a lower variation (9%) between the hospitals than models I and II. Model III displays the  
26 changes in the number of components of mistreatment experienced by participants of the two  
27 groups (pre-intervention and post-intervention) after adjusting for potential confounders.  
28  
29  
30  
31  
32  
33  
34  
35  
36  
37  
38  
39  
40  
41

42 As displayed in Table 4, the number of components of mistreatment experienced by women in  
43 the post-intervention group is lower by 18% than those in the pre-intervention group; adjusted  
44 regression coefficient ( $A\beta = 0.82$ , 95%CI: 0.74-0.91). The fixed effects model with hospitals as  
45 predictors yielded the same effect size with a narrower CI ( $A\beta = 0.82$ , 95%CI: 0.76-0.89).  
46  
47  
48  
49  
50

51 The number of components of mistreatment experienced by women was higher among women  
52 with complications during pregnancy ( $A\beta = 1.17$ , 95%CI: 1.01-1.34) or delivery ( $A\beta = 1.16$ ,  
53 95%CI: 1.03-1.32). Women who delivered by caesarean section after trial of vaginal delivery  
54  
55  
56  
57  
58  
59  
60

( $A\beta = 0.76$ , 95%CI: 0.63-0.92) and by caesarean section without trial of vaginal delivery ( $A\beta = 0.68$ , 95%CI: 0.47-0.98) experienced fewer number of mistreatment components. The number of mistreatment components experienced by women did not significantly vary by women's demographic, service-related, or other obstetric characteristics not already mentioned above (Table 4).

## Discussion

This study was conducted as part of a mixed methods implementation research that aims to identify health system barriers to respectful maternity care and to propose and test mitigation approaches. To our knowledge, this study is the first to report on the effectiveness of a respectful maternity care intervention (facility-level) in Ethiopia. The study found that the number of mistreatment components experienced by women after the respectful maternity care intervention was reduced by 18% compared to the number experienced by women before the intervention. This is a notable improvement given the small-scale intervention we implemented and the known limitations of interventions focused primarily on training health workers.<sup>47</sup> Training of service providers alone cannot be a solution to address mistreatment unless other system elements that significantly influence the behaviour of service providers are also addressed.

Similar implementation studies have been conducted in response to the growing attention to mistreatment and the need to identify recommendations to eliminate mistreatment. The *Heshima* study (Kenya)<sup>39</sup> and the *Staha* study (Tanzania)<sup>41</sup> were conducted to assess the impact of respectful maternity care interventions on the level of mistreatment. The *Heshima* study involved a multi-component respectful maternity care intervention (policy, facility, and community level); 7% reduction in the prevalence of mistreatment was reported following the intervention.<sup>39</sup> The *Staha* study involved community level (client service charter) and facility-level (quality improvement inventory and intervention in maternity wards) interventions, and reported a 66% reduction in the odds of women reporting mistreatment after the intervention.<sup>41</sup> Both *Heshima* and *Staha* studies used a prevalence measure of mistreatment; women who

1 faced at least one form of mistreatment were labelled as mistreated. Considering women who  
2 encountered at least one form of mistreatment as mistreated in these studies may have resulted  
3 in the underestimation of the magnitude of change.  
4  
5

6  
7 In this study, the proportion of women who experienced non-consented care, physical abuse,  
8 and refusal of preference was significantly lower in the post-intervention group. No significant  
9 difference was observed in the proportion of women who experienced mistreatment in the  
10 remaining three categories of mistreatment (verbal abuse; lack of information, privacy and  
11 confidentiality; and neglect and discrimination). The very high proportion of women who  
12 reported 'non-consented care' suggests that the issue of obtaining consent is not well  
13 understood by the staff (and probably by the hospital administration also). Similarly, the very  
14 high proportion of women who reported 'lack of information, privacy and confidentiality' and  
15 'refusal of preferences' suggests a poor understanding of these concepts and rights among  
16 providers. These are areas that need to be integrated and foregrounded into professional  
17 development/quality improvement programs for all levels of staff and the pre-service training of  
18 health professionals. Additionally, the high level of mistreatment among women who had  
19 complications during delivery, and assisted vaginal delivery might be explained by the fact that  
20 several cadres attend women during such events.  
21  
22  
23  
24  
25  
26  
27  
28  
29  
30  
31  
32  
33  
34  
35  
36  
37

38 According to the *Health Workers for Change* study conducted in four African countries,  
39 structural issues such as shortage/lack of manpower and supplies, and poor working conditions  
40 inhibit implementation of change interventions.<sup>48</sup> According to the Bowser and Hill framework<sup>49</sup>,  
41 structural constraints not only impede change initiatives, they also independently contribute to  
42 mistreatment. Thus, the categories of mistreatment that were likely to have been a product of  
43 these structural issues were not influenced by the intervention because it lacked a structural  
44 dimension.  
45  
46  
47  
48  
49  
50  
51  
52

53 The fact that there is no private labour room combined with the increased presence of birth  
54 companions after the intervention may explain the relative lack of improvement in women's  
55  
56  
57  
58  
59  
60

1 privacy. Adequate preparation and adaptation of labour wards is recommended before  
2 operationalizing birth companionship in resource-limited contexts.<sup>34, 50</sup> Lunze and colleagues  
3 reviewed 259 (83 sub-Saharan Africa based) studies and reports of innovative approaches for  
4 improving maternal and newborn health, using the lens of WHO's health system building blocks.  
5 The review revealed that interventions in one health system building block affected other  
6 building blocks; the review recommends a system-wide intervention to maximize the  
7 effectiveness and sustainability of interventions.<sup>51</sup> Similarly, WHO also recommends that  
8 respectful maternity care should be viewed through the lens of systems thinking when  
9 prioritizing action areas to improve quality of care.<sup>36</sup>

10  
11  
12  
13  
14  
15  
16  
17  
18  
19  
20 What makes the *Staha* study similar to our study is that, no changes in the level of verbal abuse  
21 and neglect and discrimination were observed after the intervention.<sup>41</sup> This might be explained  
22 by the fact that ingrained negative and normalized behaviours require time to change and are  
23 highly associated with age and experience of service providers, younger and less experienced  
24 providers being less supportive during labour.<sup>52</sup> On the contrary, if a proactive focus on  
25 respectful care is provided during pre-service training to younger graduates, who are usually  
26 motivated for change, it may nurture respectful behaviour.<sup>53</sup> Additionally, other factors such as  
27 uncomfortable working circumstances, overcrowded facilities, space constraints, and poorly  
28 motivated staff are not only barriers to the implementation of new guidelines<sup>54</sup> but also  
29 contributors to mistreatment.<sup>49</sup> These factors may have contributed to the steady level of the  
30 mistreatment components that did not improve in the current study.

31  
32  
33  
34  
35  
36  
37  
38  
39  
40  
41  
42  
43  
44 Evidence suggests that women's chosen birth companionship contributes to positive birth  
45 outcomes for both the mother and the newborn<sup>55</sup> and is recommended by the WHO.<sup>34</sup> In this  
46 study, among 120 women who wanted to have a birth companion, only 18(15%) were allowed to  
47 have their chosen companion (11.6% in pre-intervention vs 23.5% in post-intervention group).  
48 Additionally, 16.7% (14% in pre-intervention vs 23.5% in post-intervention group) of those who  
49 would have wanted to have a companion were afraid to ask service providers about this. These  
50 unexpressed preferences highlight that facilities and service providers should promote  
51  
52  
53  
54  
55  
56  
57  
58  
59  
60

1 companionship rather than wait for the request to come from women.<sup>34, 55</sup> And this should be  
2 supported by political commitment, high-level advocacy, and operating guidelines.<sup>56</sup> The  
3 proportion of women who reported to have their preference during childbirth in the post-  
4 intervention survey was lower than that of pre-intervention survey participants; this may be due  
5 to the high proportion of women who had a caesarean birth in the post-intervention survey.  
6

7  
8  
9  
10  
11 In this study, comparing the number (counts) of mistreatment components women experienced  
12 helped to identify the changes in the extent or diversity of mistreatment that would not have  
13 been possible to identify by simple prevalence measures. Additionally, treating hospitals as  
14 random-effects in the statistical model controls for the impact of other interventions that may  
15 have happened around the same time in those facilities. The absence of difference in  
16 demographic and obstetric characteristics between women of the two groups (pre-intervention  
17 and post-intervention) also adds to the soundness of the statistical analysis used to detect  
18 changes in mistreatment. Additionally, where women are admitted in a shared ward, comparing  
19 the proportion of women mistreated rather than comparing the counts of mistreatment fails to  
20 detect changes that might have resulted after an intervention. This is because, there are  
21 components of mistreatment that cannot be totally prevented without major structural changes,  
22 for example, provision of adequate space to ensure privacy and confidentiality.<sup>40</sup>  
23  
24  
25  
26  
27  
28  
29  
30  
31  
32  
33  
34  
35  
36  
37

38 One of the limitations of this study is that the mistreatment components experienced by women  
39 repeatedly were counted only once as binary response options (yes/no) questions were used.  
40 This approach fails to capture multiple incidents of mistreatment components experienced by  
41 women, for example, how many times a woman was verbally abused. Additionally, it might have  
42 also led to the underestimation of the intervention effect size. To overcome such problems,  
43 using questions with frequency response options is recommended. A survey of women at their  
44 exit, as in this study, is prone to recall bias in acquiring data on multiple incidents; instead,  
45 independent observation in the labour room would be more appropriate.<sup>57</sup> However, observation  
46 also has inherent limitations, e.g. the Hawthorne effect—service providers modify their  
47 behaviour and become less disrespectful because they know they are being observed.  
48  
49  
50  
51  
52  
53  
54  
55  
56  
57  
58  
59  
60

1 Pertaining to the generalizability of findings, because the study was conducted only in three  
2 hospitals located in the SNNPR, the findings may not be generalizable to other types of  
3 hospitals, health centres, and clinics that provide childbirth services in Ethiopia. Additionally, the  
4 short washout period and the lack of a control group in this study is a key limitation as it is not  
5 possible to attribute with certainty the changes observed to the respectful maternity care  
6 intervention.  
7  
8  
9  
10  
11  
12

13  
14 Finally, we believe that this study being the first to test the effectiveness of a respectful  
15 maternity care intervention in Ethiopia, contributes to evidence for further endeavours to  
16 improve respectful maternity care specifically, and the quality of childbirth services generally.  
17 Thorough implementation studies that are designed to capture macro and micro level  
18 contributors to mistreatment need to be conducted to inform evidence-driven actions to  
19 eliminate mistreatment during facility-based childbirth in Ethiopia.  
20  
21  
22  
23  
24  
25  
26

## 27 **Conclusions**

28  
29 This study revealed that the childbirth services women received in the study hospitals were  
30 characterized by a wide range of mistreatment behaviours and/or health facility conditions. The  
31 respectful maternity care intervention tested in this study was accompanied by a reduction in  
32 women's experience of mistreatment during facility-based childbirth. Given the variety of factors  
33 that lead to mistreatment in health facilities, interventions designed to mitigate mistreatment  
34 need to be multidimensional—including demand-side (community level), supply-side (health  
35 system level), and policy-level interventions. We believe that this study adds to existing  
36 knowledge on innovations that can be used to mitigate mistreatment. Further research is  
37 needed to investigate the impact and sustainability of health system-level interventions on  
38 women's experiences of mistreatment during facility-based childbirth.  
39  
40  
41  
42  
43  
44  
45  
46  
47  
48  
49  
50

## 51 **Acknowledgements**

52  
53 We would like to pass our heartfelt thanks to experts at the Federal Ministry of Health, the  
54 SNNPR Health Bureau, and Hawassa University College of Medicine and Health Sciences who  
55  
56  
57  
58  
59  
60

1 reviewed the respectful maternity care training manual and coordinated the training sessions.  
2  
3 We also extend our appreciation to all participants of the study, service providers, and facility  
4  
5 administrations for being an active player in the smooth operation of the study. Members of the  
6  
7 data collection team also deserve a warm appreciation for their engagement.  
8  
9

### 10 **Contributors**

11 AA conceived the study; AA, AM and MK designed the study, developed data collection tools;  
12  
13 AA trained data collectors, coordinated the fieldwork; AA, SA, HM, ET and SG conducted the  
14  
15 intervention; AA, AM and MK analysed the data; AA, AM and MK drafted the manuscript; SA,  
16  
17 HM, ET and SG revised the manuscript for intellectual content. All authors have read and  
18  
19 approved the manuscript.  
20  
21  
22

### 23 **Funding**

24  
25 The training of service providers was made possible by support from the Institute of Healthcare  
26  
27 Improvement (IHI) through the Federal Ministry of Health, Ethiopia. The primary author of this  
28  
29 study is the recipient of the Melbourne Research Scholarship (University of Melbourne), and the  
30  
31 Population Health Investing in Research Students' Training (PHIRST) travel grant (Melbourne  
32  
33 School of Population and Global Health, University of Melbourne). The contents of this research  
34  
35 article only reflect the authors' opinions but do not show interest/s of either of the organizations  
36  
37 involved in the funding.  
38  
39

### 40 **Competing interests**

41  
42 The authors declare that they have no competing interests  
43  
44

### 45 **Ethics approval**

46  
47 Ethics approval was obtained from the Institutional Review Board (Ethics ID: 3-12/12926)  
48  
49 located in SNNPR Health Bureau, Ethiopia and the Human Ethics Sub-Committee (Ethics ID:  
50  
51 HESC 1750054) at the University of Melbourne, Australia. Permission letter to conduct this  
52  
53 study was also granted from the Federal Ministry of Health and SNNPR Health Bureau.  
54  
55  
56  
57  
58  
59  
60



Information about the study was delivered to all study participants in local languages and written consent was obtained.

### Data sharing statement

Reasonable requests can be made to access study data from the corresponding author.

**Word count: 5688**

### References

1. World Health Organization. Trends in maternal mortality: 2000 to 2017: Estimates by WHO, UNICEF, UNFPA, World Bank Group and the United Nations Population Division. Geneva, Switzerland: World Health Organization; 2019.
2. Alvarez JL, Gil R, Hernandez V, Gil A. Factors associated with maternal mortality in Sub-Saharan Africa: an ecological study. *BMC public health*. 2009;9:462.
3. Every Woman Every Child. The global strategy for women's, children's and adolescents' health (2016-2030). *Every Woman Every Child*; 2015.
4. Ethiopian Public Health Institute (EPHI) [Ethiopia] and ICF. Ethiopia Mini Demographic and Health Survey 2019: Key Indicators. Rockville, Maryland, USA: EPHI and ICF; 2019.
5. Hailu D, Berhe H. Determinants of institutional childbirth service utilisation among women of childbearing age in urban and rural areas of Tsegedie district, Ethiopia. *Midwifery*. 2014;30(11):1109-17.
6. Roro MA, Hassen EM, Lemma AM, Gebreyesus SH, Afework MF. Why do women not deliver in health facilities: a qualitative study of the community perspectives in south central Ethiopia? *BMC Res Notes*. 2014;7:556.
7. Sipsma H, Thompson J, Maurer L, Bradley E, Curry L. Preferences for home delivery in Ethiopia: provider perspectives. *Glob Public Health*. 2013;8(9):1014-26.
8. Tarekegn SM, Lieberman LS, Giedraitis V. Determinants of maternal health service utilization in Ethiopia: analysis of the 2011 Ethiopian Demographic and Health Survey. *BMC pregnancy and childbirth*. 2014;14:161.
9. Mirkuzie AH. Exploring inequities in skilled care at birth among migrant population in a metropolitan city Addis Ababa, Ethiopia; a qualitative study. *Int J Equity Health*. 2014;13:110.
10. Jackson R, Tesfay FH, Godefay H, Gebrehiwot TG. Health Extension Workers' and Mothers' Attitudes to Maternal Health Service Utilization and Acceptance in Adwa Woreda, Tigray Region, Ethiopia. *PLoS One*. 2016;11(3):e0150747.
11. Wassihun B, Zeleke S. Compassionate and respectful maternity care during facility based child birth and women's intent to use maternity service in Bahir Dar, Ethiopia. *BMC pregnancy and childbirth*. 2018;18(1):294.
12. King R, Jackson R, Dietsch E, Hailemariam A. Barriers and facilitators to accessing skilled birth attendants in Afar region, Ethiopia. *Midwifery*. 2015;31(5):540-6.
13. Bohren MA, Hunter EC, Munthe-Kaas HM, Souza JP, Vogel JP, Gulmezoglu AM. Facilitators and barriers to facility-based delivery in low- and middle-income countries: a qualitative evidence synthesis. *Reproductive health*. 2014;11(1):71.
14. Tappis H, Koblinsky M, Doocy S, Warren N, Peters DH. Bypassing Primary Care Facilities for Childbirth: Findings from a Multilevel Analysis of Skilled Birth Attendance Determinants in Afghanistan. *J Midwifery Womens Health*. 2016;61(2):185-95.
15. Otis KE, Brett JA. Barriers to hospital births: why do many Bolivian women give birth at home? *Revista Pana-mericana de Salud Publica*. 2008;24(1):46-53.
16. Crissman HP, Engmann CE, Adanu RM, Nimako D, Crespo K, Moyer CA. Shifting norms: pregnant women's perspectives on skilled birth attendance and facility-based delivery in rural Ghana. *Afr J Reprod Health*. 2013;17(1):15-26.
17. Dahlberg M, Södergård B, Thorson A, Alfvén T, Awiti-Ujiji O. Being perceived as 'a real woman' or following one's own convictions: a qualitative study to understand individual, family, and community

- influences on the place of childbirth in Busia, Kenya. *Culture, Health & Sexuality*. 2015;17(3):326-42.
18. Kwambai TK, Dellicour S, Desai M, Ameh CA, Person B, Achieng F, et al. Perspectives of men on antenatal and delivery care service utilisation in rural western Kenya: a qualitative study. *BMC pregnancy and childbirth*. 2013;13:134.
19. Kujawski S, Mbaruku G, Freedman LP, Ramsey K, Moyo W, Kruk ME. Association Between Disrespect and Abuse During Childbirth and Women's Confidence in Health Facilities in Tanzania. *Matern Child Health J*. 2015;19(10):2243-50.
20. Seljeskog L, Sundby J, Chimango J. Factors influencing women's choice of place of delivery in rural Malawi--an explorative study. *Afr J Reprod Health*. 2006;10(3):66-75.
21. Bruce SG, Blanchard AK, Gurav K, Roy A, Jayanna K, Mohan HL, et al. Preferences for infant delivery site among pregnant women and new mothers in Northern Karnataka, India. *BMC pregnancy and childbirth*. 2015;15:49.
22. Sando D, Abuya T, Asefa A, Banks KP, Freedman LP, Kujawski S, et al. Methods used in prevalence studies of disrespect and abuse during facility based childbirth: lessons learned. *Reproductive health*. 2017;14(1):127.
23. Bohren MA, Vogel JP, Hunter EC, Lutsiv O, Makh SK, Souza JP, et al. The Mistreatment of Women during Childbirth in Health Facilities Globally: A Mixed-Methods Systematic Review. *PLoS medicine*. 2015;12(6):e1001847; discussion e.
24. Banks KP, Karim AM, Ratcliffe HL, Betemariam W, Langer A. Jeopardizing quality at the frontline of healthcare: prevalence and risk factors for disrespect and abuse during facility-based childbirth in Ethiopia. *Health Policy Plan*. 2018;33(3):317-27.
25. Gebremichael MW, Worku A, Medhanyie AA, Berhane Y. Mothers' experience of disrespect and abuse during maternity care in northern Ethiopia. *Glob Health Action*. 2018;11(sup3):1465215.
26. Asefa A, Bekele D. Status of respectful and non-abusive care during facility-based childbirth in a hospital and health centers in Addis Ababa, Ethiopia. *Reproductive health*. 2015;12:33.
27. Asefa A, Bekele D, Morgan A, Kermod M. Service providers' experiences of disrespectful and abusive behavior towards women during facility based childbirth in Addis Ababa, Ethiopia. *Reproductive health*. 2018;15(1):4.
28. Sheferaw ED, Bazant E, Gibson H, Fenta HB, Ayalew F, Belay TB, et al. Respectful maternity care in Ethiopian public health facilities. *Reprod Health*. 2017;14(1):60.
29. World Health Organization. The prevention and elimination of disrespect and abuse during facility-based childbirth. World Health Organization; 2014.
30. Vogel JP, Bohren MA, Tuncalp O, Oladapo OT, Adanu RM, Balde MD, et al. How women are treated during facility-based childbirth: development and validation of measurement tools in four countries - phase 1 formative research study protocol. *Reproductive health*. 2015;12:60.
31. Rubashkin N, Warnock R, Diamond-Smith N. A systematic review of person-centered care interventions to improve quality of facility-based delivery. *Reproductive health*. 2018;15(1):169.
32. Nilvér H, Begley C, Berg M. Measuring women's childbirth experiences: a systematic review for identification and analysis of validated instruments. *BMC pregnancy and childbirth*. 2017;17(1):203.
33. White Ribbon Alliance. Respectful maternity care: the universal rights of childbearing women. Washington (District of Columbia): White Ribbon Alliance; 2011.
34. World Health Organization. WHO recommendations: Intrapartum care for a positive childbirth experience. World Health Organization; 2018.
35. World Health Organization. Strategies toward ending preventable maternal mortality (EPMM). World Health Organization; 2015.
36. World Health Organization. Standards for improving quality of maternal and newborn care in health facilities. World Health Organization; 2016.
37. Bohren MA, Mehrdash H, Fawole B, Maung TM, Balde MD, Maya E, et al. How women are treated during facility-based childbirth in four countries: a cross-sectional study with labour observations and community-based surveys. *Lancet*. 2019.
38. The Federal Democratic Republic of Ethiopia Ministry of Health. Health Sector Transformation Plan: 2015/16 - 2019/20. Addis Ababa, Ethiopia: Federal Ministry of Health; 2015.
39. Abuya T, Ndwiga C, Ritter J, Kanya L, Bellows B, Binkin N, et al. The effect of a multi-component intervention on disrespect and abuse during childbirth in Kenya. *BMC pregnancy and childbirth*. 2015;15(1):224.
40. Ratcliffe HL, Sando D, Lyatuu GW, Emil F, Mwanjika-Sando M, Chalamilla G, et al. Mitigating disrespect and abuse during childbirth in Tanzania: an exploratory study of the effects of two facility-based interventions in a large public hospital. *Reproductive health*. 2016;13(1):79.

- 1 41. Kujawski SA, Freedman LP, Ramsey K, Mbaruku G, Mbuyita S, Moyo W, et al. Community and  
2 health system intervention to reduce disrespect and abuse during childbirth in Tanga Region,  
3 Tanzania: A comparative before-and-after study. *PLoS medicine*. 2017;14(7):e1002341.
- 4 42. Charity N, Warren C, Abuya T, Kanya L, AliceMaranga, Ochieng C, et al. Promoting respectful  
5 maternity care a training guide for facility-based workshops. New York: Population Council; 2015.
- 6 43. Maternal and Child Health Integrated Program. Respectful maternity care workshop: Learning  
7 resource package. Maternal and Child Health Integrated Program; 2013.
- 8 44. White Ribbon Alliance. Respectful Maternity Care: A Nigeria Focused Health Workers' Training  
9 Guide. Washington, DC: Futures Group, Health Policy Project; 2015.
- 10 45. United Nations. Universal Declaration of Human Rights: United Nations; 1948 [Available from:  
11 <http://www.un.org/en/universal-declaration-human-rights/>.
- 12 46. United Nations General Assembly. Technical guidance on the application of a human rightsbased  
13 approach to the implementation of policies and programmes to reduce preventable maternal  
14 morbidity and mortality. United Nations; 2012.
- 15 47. Chang YS, Coxon K, Portela AG, Furuta M, Bick D. Interventions to support effective  
16 communication between maternity care staff and women in labour: A mixed-methods systematic  
17 review. *Midwifery*. 2018;59:4-16.
- 18 48. Fonn S, Mtonga AS, Nkoloma HC, Bantebya Kyomuhendo G, daSilva L, Kazilimani E, et al. Health  
19 providers' opinions on provider-client relations: results of a multi-country study to test Health  
20 Workers for Change. *Health Policy Plan*. 2001;16 Suppl 1:19-23.
- 21 49. Bowser D, Hill K. Exploring Evidence for Disrespect and Abuse in Facility-Based Childbirth-A  
22 landscape analysis of the global situation of abuse and disrespect in maternity care. USAID,  
23 Traction Project; 2010.
- 24 50. Miller S, Abalos E, Chamillard M, Ciapponi A, Colaci D, Comande D, et al. Beyond too little, too late  
25 and too much, too soon: a pathway towards evidence-based, respectful maternity care worldwide.  
26 *Lancet*. 2016.
- 27 51. Lunze K, Higgins-Steele A, Simen-Kapeu A, Vesel L, Kim J, Dickson K. Innovative approaches for  
28 improving maternal and newborn health--A landscape analysis. *BMC pregnancy and childbirth*.  
29 2015;15:337.
- 30 52. Barrett SJ, Stark MA. Factors associated with labor support behaviors of nurses. *J Perinat Educ*.  
31 2010;19(1):12-8.
- 32 53. Dynes MM, Twentyman E, Kelly L, Maro G, Msuya AA, Dominico S, et al. Patient and provider  
33 determinants for receipt of three dimensions of respectful maternity care in Kigoma Region,  
34 Tanzania-April-July, 2016. *Reprod Health*. 2018;15(1):41.
- 35 54. Spallek H, Song M, Polk DE, Bekhuis T, Frantsve-Hawley J, Aravamudhan K. Barriers to  
36 implementing evidence-based clinical guidelines: a survey of early adopters. *J Evid Based Dent  
37 Pract*. 2010;10(4):195-206.
- 38 55. Hodnett ED, Gates S, Hofmeyr GJ, Sakala C. Continuous support for women during childbirth.  
39 *Cochrane Database of Systematic Reviews*. 2013(7).
- 40 56. Sharma G, Mathai M, Dickson KE, Weeks A, Hofmeyr G, Lavender T, et al. Quality care during  
41 labour and birth: a multi-country analysis of health system bottlenecks and potential solutions. *BMC  
42 pregnancy and childbirth*. 2015;15 Suppl 2:S2.
- 43 57. Bohren MA, Vogel JP, Fawole B, Maya ET, Maung TM, Balde MD, et al. Methodological  
44 development of tools to measure how women are treated during facility-based childbirth in four  
45 countries: labor observation and community survey. *BMC Med Res Methodol*. 2018;18(1):132.
- 46
- 47
- 48
- 49
- 50
- 51
- 52
- 53
- 54
- 55
- 56
- 57
- 58
- 59
- 60

**Table 1 Women's experience of mistreatment during childbirth**

| <b>Types of mistreatment experienced</b>                                                                          | <b>Pre-intervention<br/>n (%)</b> | <b>Post-intervention<br/>n (%)</b> | <b>p-value<br/>for <math>\chi^2</math></b> |
|-------------------------------------------------------------------------------------------------------------------|-----------------------------------|------------------------------------|--------------------------------------------|
| <b>Verbal abuse</b>                                                                                               | 17 (8.6)                          | 11 (5.8)                           | 0.29                                       |
| Health workers used harsh or rude language                                                                        | 8 (4.0)                           | 6 (3.2)                            | 0.64                                       |
| Health workers made judgmental or accusatory comments about woman                                                 | 8 (4.1)                           | 2 (1.1)                            | 0.06                                       |
| Health workers made threats of withholding treatment                                                              | 1 (0.5)                           | 2 (1.1)                            | 0.54                                       |
| Health workers blamed woman for any features of birth outcome                                                     | 4 (2.0)                           | 4 (2.1)                            | 0.95                                       |
| <b>Physical abuse</b>                                                                                             | 33 (16.7)                         | 17 (8.9)                           | 0.02*                                      |
| Woman was beaten, slapped, kicked, or pinched                                                                     | 7 (3.5)                           | 5 (2.6)                            | 0.61                                       |
| Woman was gagged                                                                                                  | 19 (9.6)                          | 11 (5.8)                           | 0.16                                       |
| Woman was restrained                                                                                              | 19 (9.6)                          | 9 (4.74)                           | 0.06                                       |
| <b>Non-consented care</b>                                                                                         | 165 (83.3)                        | 124 (65.3)                         | <0.001*                                    |
| Health workers did not obtain consent for procedure/s                                                             | 138 (69.7)                        | 84 (44.2)                          | <0.001*                                    |
| Health workers ever separated woman from her baby without explaining                                              | 14 (7.1)                          | 7 (3.7)                            | 0.14                                       |
| Health workers did not ask woman's permission before conducting vaginal examination                               | 128 (64.7)                        | 91 (47.9)                          | 0.001*                                     |
| Health workers did not ask woman's permission before performing surgery (episiotomy or caesarean section) (n=220) | 69 (65.1)                         | 44 (38.6)                          | <0.001*                                    |
| Health workers made woman stay in the hospital against her will                                                   | 4 (2.0)                           | 2 (1.1)                            | 0.44                                       |
| <b>Lack of information, privacy and confidentiality</b>                                                           | 189 (95.5)                        | 182 (95.8)                         | 0.88                                       |
| Health workers did not keep woman's information confidential                                                      | 18 (9.1)                          | 7 (3.7)                            | 0.03*                                      |
| Health workers conducted vaginal examination without maintaining woman's privacy                                  | 162 (81.8)                        | 147 (77.4)                         | 0.28                                       |
| Health workers did not give periodic updates on woman's labour                                                    | 104 (52.5)                        | 129 (67.9)                         | 0.002*                                     |
| Health workers spoke to woman in a language she could not understand                                              | 5 (2.5)                           | 9 (4.7)                            | 0.24                                       |
| <b>Neglect and discrimination</b>                                                                                 | 24 (12.1)                         | 17 (8.9)                           | 0.31                                       |
| Health workers did not always come following woman's call                                                         | 8 (4.0)                           | 7 (3.7)                            | 0.86                                       |
| Woman was ever left for a prolonged period of time without attention                                              | 19 (9.6)                          | 12 (6.3)                           | 0.23                                       |
| Health worker was not present for the actual birth of woman's baby                                                | 5 (2.5)                           | 3 (1.6)                            | 0.51                                       |
| Health workers discriminated woman based on her attribute                                                         | -                                 | 2 (1.1)                            | -                                          |
| <b>Refusal of preference</b>                                                                                      | 134 (67.7)                        | 104 (54.7)                         | 0.01*                                      |
| Health workers did not allow woman to have a birth companion present                                              | 64 (86.5)                         | 18 (69.2)                          | 0.04*                                      |
| Health workers did not allow woman to move around during labour                                                   | 43 (76.7)                         | 63 (94.3)                          | 0.002*                                     |
| Health workers did not allow woman to have foods or fluids                                                        | 66 (94.3)                         | 62 (98.4)                          | 0.21                                       |
| Health workers did not allow woman to deliver in her preferred position                                           | 43 (66.2)                         | 12 (33.3)                          | 0.001*                                     |
| Health workers did not allow woman to have cultural practice in labour                                            | 16 (76.2)                         | 0 (-)                              | -                                          |

**Table 2 Women's sociodemographic characteristics**

| Variables                                 |                      | Pre-intervention<br>n (%) | Post-intervention<br>n (%) | p-value<br>for $\chi^2$ |
|-------------------------------------------|----------------------|---------------------------|----------------------------|-------------------------|
| Place of residence                        | Urban                | 125 (63.1)                | 119 (62.6)                 | 0.92                    |
|                                           | Rural                | 73 (36.9)                 | 71 (37.4)                  |                         |
| Age in completed year                     | 15-24                | 98 (49.5)                 | 96 (50.5)                  | 0.93                    |
|                                           | 25-34                | 89 (45.0)                 | 85 (44.8)                  |                         |
|                                           | 35-44                | 11 (5.5)                  | 9 (4.7)                    |                         |
|                                           | Median (IQR)         | 25 (7)                    | 24 (8)                     |                         |
| Age at first pregnancy                    | Median (IQR)         | 20 (4)                    | 20 (4)                     | 0.72                    |
| Educational level                         | No formal education  | 29 (14.7)                 | 38 (20.0)                  | 0.13                    |
|                                           | Primary education    | 81 (40.9)                 | 74 (39.0)                  |                         |
|                                           | Secondary education  | 48 (24.2)                 | 54 (28.4)                  |                         |
|                                           | College and above    | 40 (20.2)                 | 24 (12.6)                  |                         |
| Marital status                            | Single               | 2 (1.0)                   | 1 (0.5)                    | 0.86                    |
|                                           | Married              | 195 (98.5)                | 188 (99.0)                 |                         |
|                                           | Separated            | 1 (0.5)                   | 1 (0.5)                    |                         |
| Religion                                  | Christian Protestant | 140 (70.7)                | 141 (74.2)                 | 0.29                    |
|                                           | Christian Orthodox   | 27 (13.6)                 | 27 (14.2)                  |                         |
|                                           | Christian Catholic   | 7 (3.5)                   | 2 (1.0)                    |                         |
|                                           | Muslim               | 17 (8.6)                  | 10 (5.3)                   |                         |
|                                           | Others               | 7 (3.6)                   | 10 (5.3)                   |                         |
| Ethnicity                                 | Sidama               | 139 (70.2)                | 128 (67.4)                 | 0.20                    |
|                                           | Oromo                | 7 (3.5)                   | 15 (7.9)                   |                         |
|                                           | Amhara               | 13 (6.6)                  | 17 (9.0)                   |                         |
|                                           | Wolayita             | 17 (8.6)                  | 17 (9.0)                   |                         |
|                                           | Others               | 22 (11.)                  | 13 (6.8)                   |                         |
| Occupation                                | Housewife            | 101 (51.0)                | 134 (70.5)                 | < 0.001                 |
|                                           | Private employee     | 8 (4.0)                   | 8 (4.21)                   |                         |
|                                           | Government employee  | 36 (18.2)                 | 29 (15.3)                  |                         |
|                                           | Private business     | 41 (20.7)                 | 13 (6.8)                   |                         |
|                                           | Others               | 12 (6.1)                  | 6 (3.2)                    |                         |
| Respondent has regular<br>monthly income* | Yes                  | 89 (45.0)                 | 69 (36.3)                  | 0.08                    |
|                                           | < 1552 Br            | 34 (38.2)                 | 25 (36.2)                  | 0.8                     |
|                                           | ≥ 1552 Br            | 55 (61.8)                 | 44 (63.8)                  |                         |
|                                           | Median (IQR)         | 2000 (2015)               | 2000 (1900)                |                         |
|                                           | No                   | 109 (55.0)                | 121 (63.7)                 |                         |

\*1USD = 27.23 Br (Average between March and August 2018)

**Table 3 Women's obstetric and maternal healthcare characteristics and preferences during childbirth**

| Variables                                               |                                             | Pre-intervention<br>n (%) | Post-intervention<br>n (%) | p-value<br>for $\chi^2$ |      |
|---------------------------------------------------------|---------------------------------------------|---------------------------|----------------------------|-------------------------|------|
| Total number of deliveries                              | One                                         | 88 (44.4)                 | 92 (48.4)                  | 0.43                    |      |
|                                                         | Two or more                                 | 110 (55.6)                | 98 (51.6)                  |                         |      |
|                                                         | Median (IQR)                                | 2 (1)                     | 2 (2)                      |                         |      |
| Place of delivery of previous child (n=206)             | Health facility                             | 82 (75.2)                 | 68 (70.1)                  | 0.41                    |      |
|                                                         | Outside health facility                     | 27 (24.8)                 | 29 (29.9)                  |                         |      |
| Number of previous facility-based deliveries            | None                                        | 22 (20.2)                 | 22 (22.5)                  |                         |      |
|                                                         | One                                         | 69 (63.3)                 | 53 (54.0)                  |                         |      |
|                                                         | Two and more                                | 18 (16.5)                 | 23 (23.5)                  |                         |      |
| Antenatal visit during index pregnancy                  | Median (IQR)                                | 1 (0)                     | 1 (0)                      | 0.35                    |      |
|                                                         | Yes                                         | 188 (94.9)                | 184 (96.8)                 |                         |      |
|                                                         | One                                         | 5 (2.7)                   | 9 (4.9)                    |                         | 0.04 |
|                                                         | Two                                         | 28 (14.9)                 | 44 (23.9)                  |                         |      |
| Experienced complication during index pregnancy         | Three or more                               | 155 (82.4)                | 131 (71.2)                 |                         |      |
|                                                         | No                                          | 10 (5.1)                  | 6 (3.2)                    |                         |      |
|                                                         | Yes                                         | 34 (17.2)                 | 19 (10.0)                  |                         |      |
| Experienced complication during index delivery          | No                                          | 164 (82.8)                | 171 (90.0)                 | 0.56                    |      |
|                                                         | Yes                                         | 67 (34.0)                 | 70 (36.8)                  |                         |      |
| Referral status on admission                            | No                                          | 130 (66.0)                | 120 (63.2)                 | 0.39                    |      |
|                                                         | Referred                                    | 81 (40.9)                 | 86 (45.3)                  |                         |      |
| Time of admission*                                      | Non-referred                                | 117 (59.1)                | 104 (54.4)                 | 0.78                    |      |
|                                                         | Day time                                    | 106 (53.5)                | 99 (52.1)                  |                         |      |
| Time of delivery*                                       | Night-time                                  | 92 (46.5)                 | 91 (47.9)                  | 0.05                    |      |
|                                                         | Day time                                    | 94 (47.5)                 | 109 (57.4)                 |                         |      |
| Type of delivery                                        | Night-time                                  | 104 (52.5)                | 81 (42.6)                  | 0.01                    |      |
|                                                         | Vaginal delivery                            | 174 (87.9)                | 147 (77.4)                 |                         |      |
|                                                         | Caesarean after trial of vaginal delivery   | 18 (9.1)                  | 38 (20.0)                  |                         |      |
| Had intervention/s for vaginal delivery (n=377)**       | Caesarean without trial of vaginal delivery | 6 (3.0)                   | 5 (2.6)                    | 0.15                    |      |
|                                                         | Yes                                         | 89 (46.4)                 | 73 (39.5)                  |                         |      |
| Types of assisted vaginal delivery (n=162) <sup>§</sup> | No                                          | 101 (53.6)                | 111 (60.5)                 | 0.83                    |      |
|                                                         | Vacuum extraction                           | 12 (13.5)                 | 9 (12.3)                   |                         |      |
|                                                         | Forceps delivery                            | 8 (9.0)                   | 2 (2.7)                    |                         |      |
| Gender of main service provider                         | Episiotomy                                  | 82 (92.1)                 | 71 (97.3)                  | 0.16                    |      |
|                                                         | Female                                      | 121 (61.1)                | 98 (51.6)                  |                         |      |
| Woman wanted to have birth companion in the labour ward | Male                                        | 77 (38.9)                 | 92 (48.4)                  | 0.06                    |      |
|                                                         | Yes                                         | 86 (43.7)                 | 34 (17.9)                  |                         |      |
| Woman wanted to move around during birth                | No                                          | 111 (56.5)                | 156 (82.1)                 | <0.001                  |      |
|                                                         | Yes                                         | 57 (28.8)                 | 67 (35.5)                  |                         |      |
| Woman wanted to have food or fluids during birth        | No                                          | 141 (71.1)                | 122 (64.5)                 | 0.16                    |      |
|                                                         | Yes                                         | 70 (35.4)                 | 63 (33.2)                  |                         |      |
|                                                         | No                                          | 128 (64.6)                | 127 (66.8)                 | 0.65                    |      |

|   |                                |     |            |            |        |
|---|--------------------------------|-----|------------|------------|--------|
| 1 | Woman had a preferred birthing | Yes | 69 (34.9)  | 36 (19.1)  | <0.001 |
| 2 | position                       | No  | 129 (65.1) | 153 (80.9) |        |
| 3 | Woman wanted to have cultural  | Yes | 43 (21.7)  | 17 (8.9)   | 0.001  |
| 4 | practice in labour             | No  | 155 (78.3) | 173 (91.1) |        |

---

5 *\*Stayed in hospital for at least two hours between 8pm and 8am immediately before childbirth*

6 *\*\*Includes: Episiotomy, vacuum extractor or forceps*

7 *§a woman can have more than one procedure*

8

9

10

11

12

13

14

15

16

17

18

19

20

21

22

23

24

25

26

27

28

29

30

31

32

33

34

35

36

37

38

39

40

41

42

43

44

45

46

47

48

49

50

51

52

53

54

55

56

57

58

59

60

For peer review only

**Table 4 Multilevel mixed-effects regression of counts of mistreatment experienced by women**

| Variables                                              | Bivariate model<br>CB (95% CI) | Model I<br>Aβ (95% CI) | Model II<br>Aβ (95% CI)   | Model III<br>Aβ (95% CI)  |
|--------------------------------------------------------|--------------------------------|------------------------|---------------------------|---------------------------|
| <b>A) Fixed effects</b>                                |                                |                        |                           |                           |
| (Intercept)                                            |                                | 4.32 (3.60, 5.12)      | <b>4.82 (3.98, 5.84)*</b> | 7.18 (3.34, 15.44)        |
| <b>Intervention group</b>                              |                                |                        |                           |                           |
| Pre-intervention                                       | Ref.                           |                        | Ref.                      | Ref.                      |
| Post-intervention                                      | 0.79 (0.72, 0.87)              |                        | <b>0.79 (0.72, 0.87)*</b> | <b>0.82 (0.74, 0.91)*</b> |
| <b>Place of residence</b>                              |                                |                        |                           |                           |
| Urban                                                  | Ref.                           |                        |                           | Ref.                      |
| Rural                                                  | 1.11 (1.00, 1.22)              |                        |                           | 1.05 (0.93, 1.19)         |
| <b>Age in completed year</b>                           |                                |                        |                           |                           |
| 15-24                                                  | Ref.                           |                        |                           | Ref.                      |
| 25-34                                                  | <b>0.85 (0.77, 0.94)*</b>      |                        |                           | 0.95 (0.82, 1.09)         |
| 35-44                                                  | <b>0.74 (0.58, 0.94)*</b>      |                        |                           | 0.81 (0.61, 1.08)         |
| <b>Age at first pregnancy</b>                          | <b>1.03 (1.01, 1.04)*</b>      |                        |                           | 1.01 (0.99, 1.03)         |
| <b>Marital status</b>                                  |                                |                        |                           |                           |
| Single                                                 | Ref.                           |                        |                           | Ref.                      |
| Married                                                | 0.77 (0.48, 1.25)              |                        |                           | 0.79 (0.45, 1.39)         |
| Separated                                              | 1.24 (0.61, 2.51)              |                        |                           | 1.06 (0.49, 2.31)         |
| <b>Religion</b>                                        |                                |                        |                           |                           |
| Christian Protestant                                   | Ref.                           |                        |                           | Ref.                      |
| Christian Orthodox                                     | 0.91 (0.78, 1.04)              |                        |                           | 0.93 (0.76, 1.12)         |
| Christian Catholic                                     | 1.01 (0.74, 1.38)              |                        |                           | 1.01 (0.73, 1.40)         |
| Muslim                                                 | 1.04 (0.87, 1.25)              |                        |                           | 1.07 (0.88, 1.31)         |
| Others                                                 | <b>0.70 (0.54, 0.93)*</b>      |                        |                           | 0.80 (0.60, 1.07)         |
| <b>Ethnicity</b>                                       |                                |                        |                           |                           |
| Sidama                                                 | Ref.                           |                        |                           | Ref.                      |
| Oromo                                                  | 0.90 (0.73, 1.12)              |                        |                           | 0.93 (0.72, 1.19)         |
| Amhara                                                 | 0.87 (0.72, 1.05)              |                        |                           | 0.98 (0.77, 1.25)         |
| Wolayita                                               | 0.96 (0.81, 1.14)              |                        |                           | 1.13 (0.92, 1.40)         |
| Others                                                 | 1.02 (0.86, 1.20)              |                        |                           | 1.00 (0.81, 1.24)         |
| <b>Educational level</b>                               |                                |                        |                           |                           |
| No formal education                                    | Ref.                           |                        |                           | Ref.                      |
| Primary education                                      | 1.11 (0.96, 1.27)              |                        |                           | 0.99 (0.84, 1.15)         |
| Secondary education                                    | 1.05 (0.90, 1.22)              |                        |                           | 0.98 (0.81, 1.18)         |
| College and above                                      | 1.18 (1.00, 1.39)              |                        |                           | 1.07 (0.84, 1.38)         |
| <b>Occupation</b>                                      |                                |                        |                           |                           |
| Housewife                                              | Ref.                           |                        |                           | Ref.                      |
| Private employee                                       | 1.06 (0.84, 1.35)              |                        |                           | 1.06 (0.77, 1.47)         |
| Government employee                                    | 1.01 (0.89, 1.16)              |                        |                           | 0.95 (0.72, 1.25)         |
| Private business                                       | 1.00 (0.87, 1.16)              |                        |                           | 1.01 (0.80, 1.27)         |
| Others                                                 | 1.14 (0.91, 1.41)              |                        |                           | 0.90 (0.69, 1.16)         |
| <b>Has regular monthly income*</b>                     |                                |                        |                           |                           |
| No                                                     | Ref.                           |                        |                           | Ref.                      |
| Yes                                                    | 0.95 (0.86, 1.04)              |                        |                           | 0.92 (0.75, 1.13)         |
| <b>Total number of deliveries</b>                      |                                |                        |                           |                           |
| One                                                    | Ref.                           |                        |                           | Ref.                      |
| Two or more                                            | <b>0.76 (0.69, 0.84)*</b>      |                        |                           | 0.86 (0.74, 1.02)         |
| <b>Antenatal visit during index pregnancy</b>          |                                |                        |                           |                           |
| No                                                     | Ref.                           |                        |                           | Ref.                      |
| Yes                                                    | 0.82 (0.66, 1.02)              |                        |                           | 0.95 (0.74, 1.22)         |
| <b>Experienced complication during index pregnancy</b> |                                |                        |                           |                           |
| No                                                     | Ref.                           |                        |                           | Ref.                      |
| Yes                                                    | <b>1.35 (1.19, 1.53)*</b>      |                        |                           | <b>1.17 (1.01, 1.34)</b>  |
| <b>Experienced complication during index delivery</b>  |                                |                        |                           |                           |



|    |                                              |                           |                    |                           |
|----|----------------------------------------------|---------------------------|--------------------|---------------------------|
| 1  | No                                           | Ref.                      |                    | Ref.                      |
| 2  | Yes                                          | <b>1.16 (1.05, 1.30)*</b> |                    | <b>1.16 (1.03, 1.32)*</b> |
| 3  | <b>Referral status on admission</b>          |                           |                    |                           |
| 4  | Referred                                     | Ref.                      |                    | Ref.                      |
| 5  | Non-referred                                 | 0.93 (0.85, 1.02)         |                    | 1.07 (0.94, 1.21)         |
| 6  | <b>Total hours of stay</b>                   | 1.00 (0.99, 1.00)         |                    | 1.00 (0.99, 1.00)         |
| 7  | <b>Gender of main service provider</b>       |                           |                    |                           |
| 8  | Female                                       | Ref.                      |                    | Ref.                      |
| 9  | Male                                         | 1.05 (0.95, 1.16)         |                    | 1.03 (0.93, 1.16)         |
| 10 | <b>Type of delivery</b>                      |                           |                    |                           |
| 11 | Vaginal delivery                             | Ref.                      |                    | Ref.                      |
| 12 | Caesarean after trial of vaginal delivery    | <b>0.78 (0.67, 0.90)*</b> |                    | <b>0.76 (0.63, 0.92)*</b> |
| 13 | Caesarean without trial of vaginal delivery  | <b>0.67 (0.48, 0.95)*</b> |                    | <b>0.68 (0.47, 0.98)*</b> |
| 14 | <b>Had intervention for vaginal delivery</b> |                           |                    |                           |
| 15 | No                                           | Ref.                      |                    | Ref.                      |
| 16 | Yes                                          | <b>1.31 (1.20, 1.44)*</b> |                    | 1.04 (0.91, 1.19)         |
| 17 | <b>B) Random effects</b>                     |                           |                    |                           |
| 18 | Hospital Variance                            | 0.02 (0.01-0.14)*         | 0.03 (0.001-0.14)* | -                         |
| 19 | ICC (%)                                      | 12.3                      | 13.6               | 9.0                       |
| 20 | <b>C) Model fitness</b>                      |                           |                    |                           |
| 21 | AIC                                          | 1600                      | 1577               | 1570                      |
| 22 | Log Likelihood                               | -798                      | -786               | -750                      |
| 23 | P value                                      | -                         | < 0.001            | < 0.001                   |

• Significant at  $p < .05$

Abbreviations:  $\beta$  exponentiated regression coefficient,  $C\beta$  crude exponentiated regression coefficient,  $A\beta$  adjusted exponentiated regression coefficient, CI confidence interval, ICC Intraclass correlation, AIC Akaike's information criterion

## Supplementary file 1

## Facility-led respectful maternity care assessment checklist for continuous quality improvement

| RMC standards                                    | Measurement criteria                                         |                                                                                                                                  | NA | Remark |
|--------------------------------------------------|--------------------------------------------------------------|----------------------------------------------------------------------------------------------------------------------------------|----|--------|
|                                                  | <b>O: observation; I: interview; RD: review of documents</b> |                                                                                                                                  |    |        |
| The woman is protected from verbal abuse         | <input type="checkbox"/>                                     | 1. Uses polite language, avoids use of harsh or rude language <b>(O)</b>                                                         |    |        |
|                                                  | <input type="checkbox"/>                                     | 2. Does not make judgmental or accusatory comments <b>(O)</b>                                                                    |    |        |
|                                                  | <input type="checkbox"/>                                     | 3. Does not make threats to withhold treatment <b>(O)</b>                                                                        |    |        |
|                                                  | <input type="checkbox"/>                                     | 4. Does not blame a woman for any feature of her birth outcome/s <b>(O)</b>                                                      |    |        |
| Score                                            | of ____                                                      |                                                                                                                                  |    |        |
| The woman is protected from physical abuse       | <input type="checkbox"/>                                     | 1. Does not beat, slap, kick, or pinch a woman <b>(O)</b>                                                                        |    |        |
|                                                  | <input type="checkbox"/>                                     | 2. Does not deny a woman to cry or scream during labor <b>(O)</b>                                                                |    |        |
|                                                  | <input type="checkbox"/>                                     | 3. Does not restrain (tie) a woman <b>(O)</b>                                                                                    |    |        |
| Score                                            | of ____                                                      |                                                                                                                                  |    |        |
| The woman is not stigmatized or discriminated    | <input type="checkbox"/>                                     | 1. Serves a woman respectfully regardless of her religion/race/ethnicity/age/socioeconomic status/medical condition <b>(O/I)</b> |    |        |
|                                                  | <input type="checkbox"/>                                     | 2. Serves a woman respectfully regardless of her medical condition <b>(O/I)</b>                                                  |    |        |
| Score                                            | of ____                                                      |                                                                                                                                  |    |        |
| The woman received professional standard of care | <input type="checkbox"/>                                     | 1. Seeks for woman's consent prior to performing any procedure <b>(O)</b>                                                        |    |        |
|                                                  | <input type="checkbox"/>                                     | 2. Never shouts loudly when communicating woman's information to other staff <b>(O/I)</b>                                        |    |        |
|                                                  | <input type="checkbox"/>                                     | 3. Keeps woman's personal information secure <b>(O/I/RD)</b>                                                                     |    |        |
|                                                  | <input type="checkbox"/>                                     | 4. Performs vaginal examination very gently to minimize pain <b>(O/I)</b>                                                        |    |        |
|                                                  | <input type="checkbox"/>                                     | 5. Maintains woman's privacy while performing vaginal examination <b>(O/I)</b>                                                   |    |        |
|                                                  | <input type="checkbox"/>                                     | 6. Gives a woman pain relief when she needs it <b>(O/I)</b>                                                                      |    |        |
|                                                  | <input type="checkbox"/>                                     | 7. Obtains woman's consent before preparing her for surgery <b>(O/I)</b>                                                         |    |        |
|                                                  | <input type="checkbox"/>                                     | 8. Responds to a woman immediately following her call <b>(O/I)</b>                                                               |    |        |
|                                                  | <input type="checkbox"/>                                     | 9. Never leaves a woman alone during labour <b>(O/I)</b>                                                                         |    |        |
| Score                                            | of ____                                                      |                                                                                                                                  |    |        |
|                                                  | <input type="checkbox"/>                                     | 1. Introduces himself/herself to a woman when he/she first meet her <b>(I/O)</b>                                                 |    |        |

1  
2  
3  
4  
5  
6  
7  
8  
9  
10  
11  
12  
13  
14  
15  
16  
17  
18  
19  
20  
21  
22  
23  
24  
25  
26  
27  
28  
29  
30  
31  
32  
33  
34  
35  
36  
37  
38  
39  
40  
41  
42  
43  
44  
45  
46  
47

|                                                                      |                          |                                                                                                      |  |  |
|----------------------------------------------------------------------|--------------------------|------------------------------------------------------------------------------------------------------|--|--|
| The woman received care with good provider rapport and communication | <input type="checkbox"/> | 2. Serves a woman in a polite manner <b>(I/O)</b>                                                    |  |  |
|                                                                      | <input type="checkbox"/> | 3. Does not ignore woman's concern/s while she is in labor <b>(I/O)</b>                              |  |  |
|                                                                      | <input type="checkbox"/> | 4. Speaks to a woman in a clear language <b>(I/O)</b>                                                |  |  |
|                                                                      | <input type="checkbox"/> | 5. Gives a woman periodic updates of progress of labor <b>(O/I)</b>                                  |  |  |
|                                                                      | <input type="checkbox"/> | 6. Gives credit to every effort a woman makes in labor <b>(O/I)</b>                                  |  |  |
|                                                                      | <input type="checkbox"/> | 7. Allows a woman to move around during labor unless there is an indication to deny her <b>(O/I)</b> |  |  |
|                                                                      | <input type="checkbox"/> | 8. Allows a woman to take food or fluids if there is no other indication to deny her <b>(I/O)</b>    |  |  |
|                                                                      | <input type="checkbox"/> | 9. Allows woman's birth companions for companionship <b>(I/O)</b>                                    |  |  |
|                                                                      | <input type="checkbox"/> | 10. Allows a woman to assume position of her choice during labor <b>(I/O)</b>                        |  |  |
|                                                                      | <input type="checkbox"/> | 11. Allows a woman any cultural practice she wants to practice in labor <b>(I/O)</b>                 |  |  |
|                                                                      | <input type="checkbox"/> | 12. Does not objectify a woman in labor <b>(I/O)</b>                                                 |  |  |
|                                                                      | <input type="checkbox"/> | 13. Does not make a woman stay in the hospital without her will <b>(I/O)</b>                         |  |  |
|                                                                      | <input type="checkbox"/> | 14. Keeps a baby with his mom unless there is another indication <b>(O/I)</b>                        |  |  |
|                                                                      | Score                    | ___ of ___                                                                                           |  |  |
| Grand score                                                          | ___ of ___               |                                                                                                      |  |  |

NA: Not applicable



Supplementary file 2: Order of studies and timing of data collection

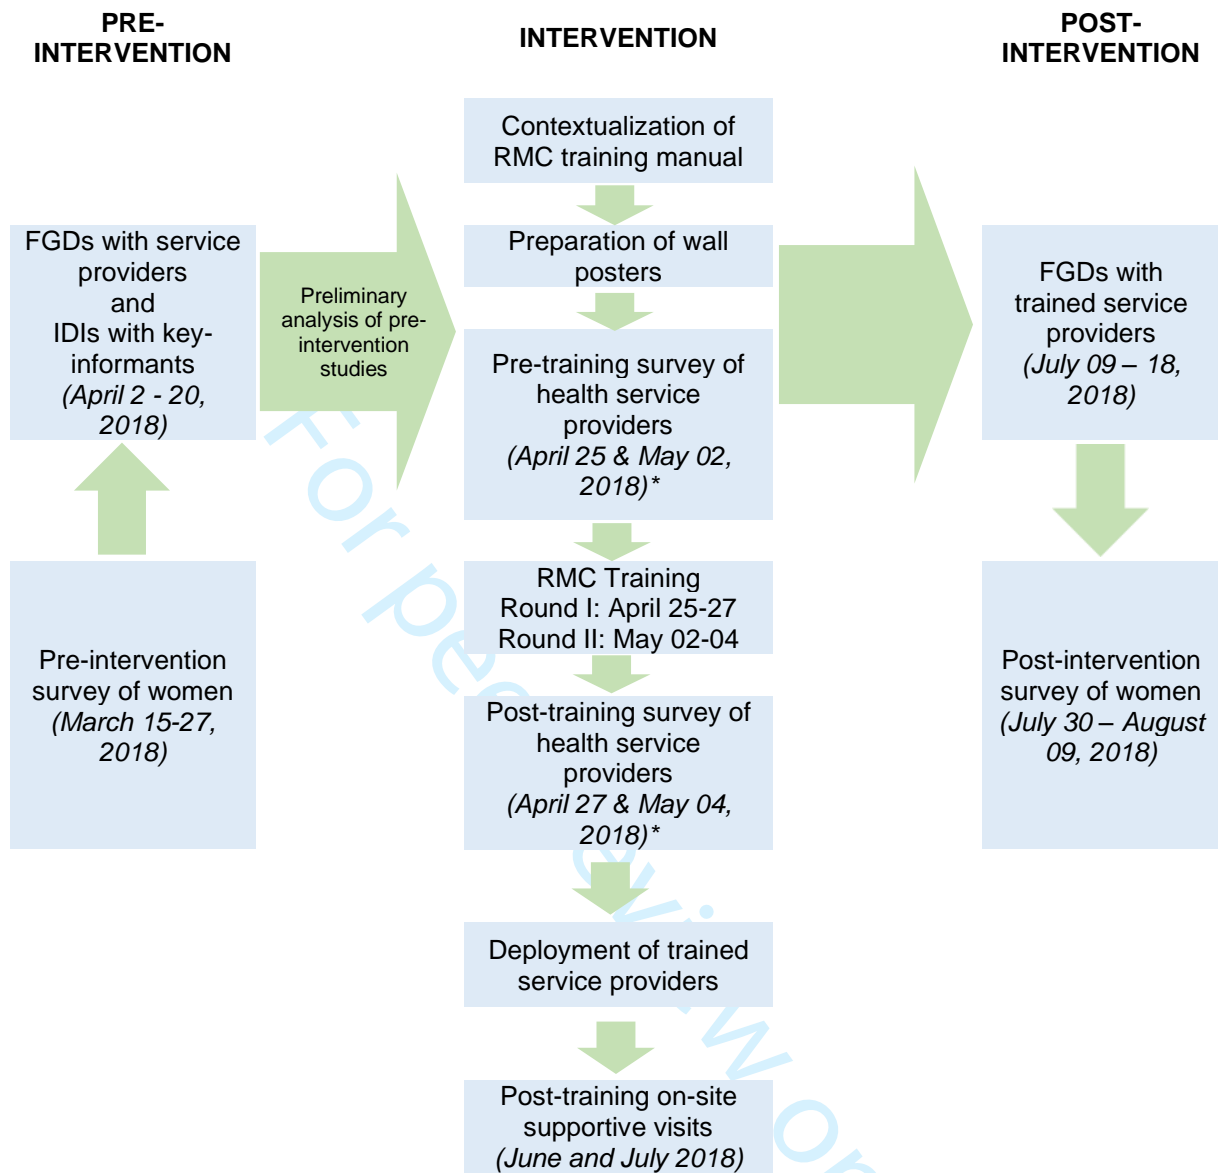

RMC-respectful maternity care

\*RMC training was conducted in two rounds from 25-27 April 2018 and 02-04 May 2018.

The post intervention FGDs and the post-intervention survey of women providers were conducted after the intervention has been completed

# RMC women's survey

Dear data collector, please read the plain language summary and seek for participants consent before proceeding to the survey

## Did the woman agree to participate?

Yes

No

## Name of data collector

Helen

Lemlem

Maereg

## Interview code (three digits)

---

## Hospital

Adare

Leku

Yirgalem

## 101. Place of residence

Urban Kebele

Rural kebele

## 102. Age in completed years

---

## 103. Age at first pregnancy (in years)

---

## 104. Marital status

Single

Married

Separated

Divorced

Widowed

**105. Religion**

- Protestant, christian
- Orthodox, christian
- Muslim
- Christian Catholic
- Others

**106. Ethnicity**

- Sidama
- Amhara
- Oromo
- Wolayita
- Others

**107. Educational status**

- No formal education
- Some primary - did not complete grade 8
- Completed grade 8
- Some secondary - did not complete grade 12
- Completed grade 12
- More than secondary

**108. Occupation**

- Housewife
- Farmer
- Private employee
- Government employee
- Private business
- Others

**109. How many children do you have?****110. Do you have regular household monthly income?**

- Yes
- No

**111. Estimated monthly income (in birr)**

1 **201. How many times have you delivered before? (including current one)**

2 \_\_\_\_\_

3

4

5 **202. Where did you deliver your last (previous) child?**

- 6  Health facility
- 7  Home
- 8  Traditional birth attendant's home
- 9  On my way to health facility
- 10
- 11
- 12
- 13
- 14

15 **203. How many times have you delivered in health facility? (excluding current one)?**

16 \_\_\_\_\_

17

18

19

20 **204. Did you have antenatal care visit during your current pregnancy?**

- 21  Yes
- 22  No
- 23
- 24
- 25

26 **205. How many antenatal care visits did you have?**

- 27  One
- 28  Two
- 29  Three or more
- 30  Don't remember
- 31
- 32
- 33
- 34
- 35

36 **206. Did you have any complication during your current pregnancy?**

- 37  Yes
- 38  No
- 39  I don't know
- 40
- 41
- 42
- 43

44 **207. Did you have any complication during your current labor and delivery?**

- 45  Yes
- 46  No
- 47
- 48
- 49

50 **301. Were you referred from other facility or directly came here in?**

- 51  Referred
- 52  Non-referred
- 53
- 54
- 55

56 **302. What time did you get admitted to the hospital?**

57 \_\_\_\_\_

58 yyyy-mm-dd

59 \_\_\_\_\_

60 hh:mm



**303. What time did you deliver?**

yyyy-mm-dd

hh:mm

**304. What type of ward were you admitted in?** Private ward Shared ward**305. What was gender of the service provider who mainly assisted you in labor?** Female Male**306. What type of birth did you have?** Vaginal birth Caesarean birth after labour trial Caesarean birth without labour trial**307. Did you have any procedure for an assisted delivery?** Yes No**308. Which procedure did you receive? (Multiple responses possible)** Vacuum Forceps Episiotomy**401. Did the health workers use harsh or rude language?** Yes No**402. Did the health workers make judgmental or accusatory comments about you?** Yes No**403. Were you beaten, slapped, kicked, or pinched during childbirth?** Yes No**404. Were you gagged during childbirth?** Yes No

1 **405. Were you physically restrained during childbirth?**

2  Yes

3  No

4  
5  
6 **406. Did the health workers make threats of withholding treatment?**

7  Yes

8  No

9  
10  
11  
12 **407. Did the health workers blame you for any feature of your birth outcomes?**

13  Yes

14  No

15  
16  
17  
18 **408. Did the health workers obtain your consent for all procedures?**

19  Yes

20  No

21  
22  
23  
24 **409. Did the health workers keep information about you confidential?**

25  Yes

26  No

27  
28  
29  
30 **410. Did you have any surgical procedure (episiotomy, cesarean section)?**

31  Yes

32  No

33  
34  
35  
36 **411. Did the health worker ask your permission before performing surgery?**

37  Yes

38  No

39  
40  
41  
42 **412. Did the health workers always come following your call?**

43  Yes

44  No

45  
46  
47  
48 **413. Were you ever left for a prolonged period of time without attention during your labour?**

49  Yes

50  No

51  
52  
53  
54 **414. Was a health provider present for the actual birth of your baby?**

55  Yes

56  No

57  
58  
59  
60 **415. Did the health workers ever separate you from your baby without explaining the reason?**

Yes

No

1 **416. Did the health workers ask your permission before conducting a vaginal examination?**

2  Yes

3  No

4  
5  
6 **417. Did any health worker conduct vaginal examination without maintaining your privacy?**

7  Yes

8  No

9  
10  
11  
12 **418. Did the health workers speak to you in a language you do not understand?**

13  Yes

14  No

15  
16  
17  
18 **419. Did the health workers give you periodic updates on your labor?**

19  Yes

20  No

21  
22  
23  
24 **420. Did you want to have a birth companion in the labor ward?**

25  Yes

26  No

27  
28  
29  
30 **421. Did the health workers allow you to have your birth companion present?**

31  Yes

32  No

33  I was afraid to ask

34  
35  
36  
37  
38 **422. Did you want to move around during your labor?**

39  Yes

40  No

41  
42  
43  
44 **423. Did the health workers allow you to move around during your labor?**

45  Yes

46  No

47  
48  
49  
50 **424. Did you want to have food or fluids during your labor?**

51  Yes

52  No

53  
54  
55  
56 **425. Did the health workers allow you to have food or fluids?**

57  Yes

58  No

1 **426. Did you have a preferred birthing position?**

2  Yes

3  No

4

5

6 **427. Did the health workers allow you to deliver in your preferred position?**

7  Yes

8  No

9  I was afraid to ask

10

11

12

13

14 **428. Did you want to have a cultural practice in labor?**

15  Yes

16  No

17

18

19

20 **429. Did the health workers allow you this cultural practice in labor?**

21  Yes

22  No

23  I was afraid to ask

24

25

26

27

28 **430. Did the health workers make you stay in the hospital against your will?**

29  Yes

30  No

31

32

33

34 **431. Did the health workers discriminate you based on your religion /ethnicity/age/socioeconomic status/medical condition?**

35  Yes

36  No

# RMC women's survey

ከመጀመሪያ በፊት የጥናቱን ዓላማ እዚህ ላይ በተጻፈው በማስረዳት የተሳታፊዎን ፈቃድ ጠይቁ

የጥናቱ ተጋባዥ ለመሳተፍ ፈቃደኛ ናት?

አዎ

አይ

የመረጃ ሰብሳቢ ስም

ሐላፊ

ለምለም

ማዕረግ

የቃለ መጠይቅ ኮድ

የሆስፒታል ስም

ኡዳሬ

ለኩ

ዶ.ር.ጋዳለም

101. የመኖሪያ አድራሻ

የከተማ ቀበሌ

የገጠር ቀበሌ

102. ዕድሜ

103. ለመጀመሪያ ጊዜ ያረገዙት በስንት እድሜዎት ነው?

104. የጋብቻ ሁኔታ

ያላገባች

ያገባች

የተለያዩች

የተፋታች

ባል የሞተባት

1 **105. ሃይማኖት**

- 2  ፕሮቴስታንት
- 3
- 4  ኦርቶዶክስ
- 5
- 6  ሙስሊም
- 7
- 8  ካቶሊክ
- 9
- 10  ሌላ
- 11

12 **106. ብሔር**

- 13  ሲዳማ
- 14
- 15  አማራ
- 16
- 17  ኦሮሞ
- 18
- 19  ወላይታ
- 20
- 21  ሌላ
- 22

23 **107. የትምህርት ደረጃ**

- 24
- 25  ያልተማረች
- 26
- 27  አንደኛ ደረጃ (1-8)
- 28
- 29  ስምንተኛ ክፍል ያጠናቀቀች
- 30
- 31  ሁለተኛ ደረጃ (9-12)
- 32
- 33  ኢሥራ ሁለተኛ ክፍል ያጠናቀቀች
- 34
- 35  ከኢሥራ ሁለተኛ ክፍል በላይ

36 **108. የሥራ ዓይነት**

- 37
- 38  የቤት አመቤት
- 39
- 40  አርሶ አደር/አርብቶ አደር
- 41
- 42  የግል ተቀጣሪ
- 43
- 44  የመንግስት ተቀጣሪ
- 45
- 46  የግል ንግድ
- 47
- 48  ሌላ

49 **109. ስንት ልጅ አለዎት?**

50

51

52

---

53

54 **110. ቋሚ ወርሃዊ ገቢ አለዎት?**

- 55  አዎ
- 56
- 57  አይ
- 58
- 59

60 **111. አማካይ የወር ገቢ (በብር)**







1 **405. በምጥም ጊዜ እንዳይንቀሳቀሱ ታስረው/ታግደው ነበር?**

2  አዎን

3  አይ

6 **406. ያዋለዱዎት የጤና ባለሙያ ክትትል/ሕክምና አልሰጥዎትም በማለት ዝተው ነበር?**

8  አዎን

9  አይ

12 **407. ያዋለዱዎት የጤና ባለሙያ በወሊድዎ ጊዜ ለተፈጠረው ሁሉ ነገር ወቅሶዎት ነበር?**

14  አዎን

15  አይ

18 **408. ያዋለዱዎት የጤና ባለሙያ ምርመራ ሲያደርጉ የእርስዎን ፈቃድ ይጠይቁ ነበር?**

20  አዎን

21  አይ

24 **409. ያዋለዱዎት የጤና ባለሙያ የእርስዎን የግል መረጃ በሚሰጥር ይይዙ ነበር?**

26  አዎን

27  አይ

30 **410. በዛሬው ወሊድዎ ጊዜ የቀድሞ ጥገና ተደርጎልዎት ነበር? (እስተትች/አፕራሲዮን)**

32  አዎን

33  አይ

36 **411. የጤና ባለሙያው እስተትች/አፕራሲዮን ከመስራታቸው በፊት የእርስዎን ፈቃድ ጠይቀው ነበር?**

38  አዎን

39  አይ

42 **412. ያዋለዱዎት የጤና ባለሙያ እርስዎ እገዛ ፈልገው ሲጠሩ ሁልጊዜ ይመጡ ነበር?**

44  አዎን

45  አይ

48 **413. በወሊድ ጊዜዎ ለረጅም ሰዓት ያለጤና ባለሙያ ክትትል ብቻዎን ተትተው ነበር?**

50  አዎን

51  አይ

54 **414. ልጅዎን በወለዱ ሰዓት የጤና ባለሙያ አጠገብዎ ነበር?**

55  አዎን

56  አይ

59 **415. ያዋለዱዎት የጤና ባለሙያ ምክንያቱን ሳይነግሩዎት ልጅዎን ከእርዎ የተለየ ቦታ አድርገው ነበር?**

አዎን

አይ

1 **416.** የዋለዳዎች የጤና ባለሙያ የማህጸን ምርመራ ሲያደርጉልዎት ፈቃድዎን ይጠይቁ ነበር?

2  አዎን

3  አይ

6 **417.** የዋለዳዎች የጤና ባለሙያ ሌሎች ሰዎች እንዳያዩ መከለያ ሳያደርጉ የማህጸን ምርመራ አድርጎልዎት ነበር?

8  አዎን

9  አይ

12 **418.** የዋለዳዎች የጤና ባለሙያ በማይረዱትና በማይገባዎት መልክ ይናገሩ ነበር?

14  አዎን

15  አይ

18 **419.** የዋለዳዎች የጤና ባለሙያ የምጥዎን ሂደት ይነግሩዎት ነበር?

20  አዎን

21  አይ

24 **420.** በወሊድዎ ጊዜ የራስዎ ሰው/ዘመድ (ድጋፍ ሰጪ) አብሮዎት ማዋለጃ ክፍል እንዲሆን ፈልገው ነበር?

26  አዎን

27  አይ

30 **421.** የጤና ባለሙያዎች የራስዎ ሰው/ዘመድ (ድጋፍ ሰጪ) አብሮዎት ማዋለጃ ክፍል እንዲሆን ፈቅደውሎት ነበር?

32  አዎን

33  አይ

34  መጠየቅ ፈርቼ አልጠየቅኩም

38 **422.** በምጥዎ ጊዜ መንቀሳቀስ ፈልገው ነበር?

39  አዎን

40  አይ

44 **423.** የጤና ባለሙያዎች በምጥዎ ጊዜ እንዲንቀሳቀሱ ፈቅደውልዎት ነበር?

45  አዎን

46  አይ

50 **424.** በምጥዎ ጊዜ ፈሳሽ ወይም ደረቅ ምግብ መውሰድ ፈልገው ነበር?

51  አዎን

52  አይ

56 **425.** የጤና ባለሙያዎች በምጥዎ ጊዜ ፈሳሽ ወይም ደረቅ ምግብ እንዲጠቀሙ ፈቅደውልዎት ነበር?

57  አዎን

58  አይ

60

1 **426. በወሊድዎ ጊዜ እንዲኖርዎት የፈለጉት አቀማመጥ ወይም አተኛኝነት ነበር?**

2  አዎን

3  አይ

6 **427. የጤና ባለሙያዎች በወሊድዎ ጊዜ ለእርዎ በሚመችዎት አቀማመጥ/አተኛኝነት እንዲወልዱ ፈቅደውልዎት ነበር?**

8  አዎን

9  አይ

10  መጠየቅ ፈርቼ አልጠየቅኩም

14 **428. በወሊድዎ ጊዜ ባህላዊ ሥነሥርዓቶችን (ቡና ማፍላት/ገንፎ ማዘጋጀት/ቅቤ መቀባት/ወዘተ) ፈልገው ነበር?**

16  አዎን

17  አይ

20 **429. በወሊድዎ ጊዜ ባህላዊ ሥነሥርዓቶችን (ቡና ማፍላት/ገንፎ ማዘጋጀት/ቅቤ መቀባት/ወዘተ) እንዲያደርጉ ፈቅደውልዎት ነበር?**

22  አዎን

23  አይ

24  መጠየቅ ፈርቼ አልጠየቅኩም

28 **430. ከወሊድዎ በኋላ ያለእርስዎ ፈቃድ በሆስፒታል እንዲቆዩ ተገደው ነበር?**

29  አዎን

30  አይ

34 **431. በወሊድዎ ጊዜ የጤና ባለሙያዎች በዘር/በሃይማኖት/በኢኮኖሚ አቅም/በዕድሜ የተነሳ መገለል አድርሰውቦት ነበር?**

35  አዎን

36  አይ

37  
38  
39  
40  
41  
42  
43  
44  
45  
46  
47  
48  
49  
50  
51  
52  
53  
54  
55  
56  
57  
58  
59  
60

# RMC women's survey

Baxamoota taje gamba assattati, fiqaadensa afi'rate taje gamba assakki albaanni xaphishu hedo eeggatena seekkite xawisse nabbawinsa

## Ama hajo beeqqate sumuu yitino?

Ee

Dee'ni

## Taje gamba asannohu su'ma

Helen

Lemlem

Maereg

## koode

---

## Hospitaale

Adaare

Lekku

Yirgalamete

## 101. Mama hee'ratta?

Katamu Qawalera

Gaxarate Qawalera

## 102. Me'e wo'ma diro ikkannohe?

---

## 103. Umo godowitta woyite me'e diro ikkannohe?

---

## 104. Mine assi'rate gari hiitooti?

Mine diassiroomma

Mine assiroomma

Baxxe hee'remma

Giwame tidhamoomma

Galte'ya reyitno

**105. Amma'na**

- Protestaantete kirstianati
- Ortodokisete kirstianaati
- Islaamaho
- Katolikete kirstiyanati
- Wolehoro kuli\_\_\_\_\_

**106. Daga**

- Sidama
- Amara
- Oromo
- Wolayita
- Wolehoro kuli\_\_\_\_\_

**107. Rosu deerri**

- Dirosoomma
- Umi deerra rose, kayinni 8 digudoma
- 8 gudoomma
- Layink deerra, kayinni 12 digudoomma
- 12 gudoomma
- Layink deer aleenniti

**108. Loosikki maati?**

- Mini amaati
- Baatto loosi're galeemma
- Gillete qaxaramoomma
- Mengistete looso loosema
- Umi'ya daddalo loosema
- Woleretiro kuli

**109. Me'e ooso noohe?****110. Minikkira aganunni egennantino eo noohe?**

- Ee
- Dinoe

**111. Aganunni afi'ratahu me'e ikkanno(birrunni)**

1 **201. Xaahunni ledo xaa geeshsha me'e higge ilootta?**

2  
3  
4 \_\_\_\_\_  
5  
6 **202. Sai qaaqqokki mama ilootta?**

- 7  Fayyimmate uurrinshira  
8  Mine  
9  ilshiishanno amuwi mine  
10  Fayyimate uurrinsha haranni doogote

11  
12  
13  
14  
15 **203. Fayyimmate mine me'e higge ilootta? ( xaa qaaqqo agurranna)**

16  
17  
18 \_\_\_\_\_  
19  
20 **204. Konne/Tenne qaaqqo Godowitta waro fayyimmate mine Godowinni noo amuwira uyinanni owaante/kaa'lo afi'rate**  
21 **ha'rootta**

- 22  
23  Ee  
24  Dee'ni/diha'roomma

25  
26  
27 **205. Owaante afi'rate me'e higge ha'rootta?**

- 28  
29  Mitte hige  
30  Lame hige  
31  Sase hige woyi hakuyi aleenni  
32  Diqaagemma

33  
34  
35  
36  
37 **206. Konne/Tenne qaaqqo godowitta waro lowo fayyimmate qarri iille egenninoheni?**

- 38  Ee  
39  Dee'ni  
40  Diafoomma

41  
42  
43  
44  
45 **207. Konne/Tenne qaaqqo godowitta woyi ilitta woyite lowo qarri ille egenninoheni?**

- 46  Ee  
47  Dee'ni

48  
49  
50  
51 **301. Wole fayyimmate uurrinshanni sonkeennahenso qaxxitahuni dayoota?**

- 52  Sonkeennae dayoomma  
53  Disonkeennae (mininni fulumma gedeenni dayoomma)

54  
55  
56  
57 **302. Tenne hospitaalera goxxe aka'ma mamote hanafootta?**

58  
59 yyy-mm-dd

hh:mm  
60 \_\_\_\_\_

**303. Ma yanna ilootta**

yyyy-mm-dd

hh:mm

**304. Goxxe fulitta kifile hiittoote?**

- Callu/mittu manchi kifileeti
- Woluno goxanno kifileeti

**305. Ilitta woyite fayyimmate ogeessi meyaatenso labbaaho?**

- Meyaate
- Labbaaho

**306. Hiittonni ilitta?**

- Qarru nookkiha illanni widoonni
- Shiimare wo'naalumahu gedensaanni darreenna iloomma
- Shiimareno wo'naalumakki darreenna iloomma

**307. ilate kaa'loro yine wolere loonsiheri nooni?**

- Ee
- Dee'ni

**308. Hiittee ilate kaa'lo loonsonnihe?**

- Qaaqqu umo amadatenni kaa'lannorichchinni
- Qarawu gedeerichchinni kaa'linoonnie
- Illanni doogo shiimawa daratenni kaa'linoonnie

**401. Fayyimmate ogeeyye kaajjado giwisanno qaale horonsdhuheni?**

- Ee
- Dee'ni

**402. Fayyimmate ogeeyye atere faradate woyi kassasate gedee hedo assitinoni?**

- Ee
- Dee'ni

**403. Ilitta woyite ganihehu, qawaadihehu, kadihehu woyi qi'miidihehu nooni?**

- Ee
- Dee'ni

**404. Ilitta woyite Fugihehunooni?**

- Ee
- Dee'ni

1 **405. Ilitta woyite biso milli yaattakki gede hoollonniheni?**

2  Ee

3  Dee'ni

4 **406. Fayyimmate ogeeyye kaa'lo ho'litanni waajjishiishshuheni?**

5  Ee

6  Dee'ni

7 **407. Fayyimmate ogeeyye ileemmahu ma ikkannokka yitanni waajjottahura woqassuheni?**

8  Ee

9  Dee'ni

10 **408. Fayyimmate Ogeeyye loossannohe loosira ate fajjo xa'mitinhohe?**

11  Ee

12  Dee'ni

13 **409. Fayyimmate Ogeeyye atewi affanno Misixire maaxxanno?**

14  Ee

15  Dee'ni

16 **410. Darre loonsonniheni (illanni doogo dara, Godowa darreenna ila)**

17  Ee

18  Dee'ni

19 **411. Fayyimmate ogeeyye godowakki darate albaanni ate fajjo xa'mitino?**

20  Ee

21  Dee'ni

22 **412. Fayyimmate Ogeeyye woshshirita woyite rakke dagganno?**

23  Ee

24  Dee'ni

25 **413. Fayyimmate ogeeyye gamete aana hee'dheenna seeda yannara ate callakki agurte hadhinoheni?**

26  Ee

27  Dee'ni

28 **414. Fayyimmate Ogeeyye qaaqqu ilami yannara mule no?**

29  Ee

30  Dee'ni

31 **415. Fayyimmate ogeeyye atera korkaata kultukkinni qaaqqokki atewiinni baddinoni?**

32  Ee

33  Dee'ni



1 **416. Fayyimmate Ogeeyye illanni doogo mirmara assate albaanni ate fajjo xa'mitinohe?**

2  Ee

3  Dee'ni

4 **417. Aye'e fayyimmate ogeessi illanni doogo mirmara assanno woyite wolu la'annokki gede assikkinni la'annoheni?**

5  Ee

6  Dee'ni

7 **418. Fayyimmate ogeessi ati afoottakki qaalinni coo'rinohe?**

8  Ee

9  Dee'ni

10 **419. Fayyimmate ogeessi gamete yannara yanna yannante heedhanno lexxo kulannohe?**

11  Ee

12  Dee'ni

13 **420. Ilate gamete goxootta kifilera jaallakki ledokki ikkitara hasi'ratani?**

14  Ee

15  Dee'ni

16 **421. Fayyimmate ogeeyye jaallakki ledokki heedhannota fajjitinnohe?**

17  Ee

18  Dee'ni

19  xa'ma waaje dixam'ooma

20 **422. Gamete yannara goxootta akawaawera milli yaa hasirottankanni?**

21  Ee

22  Dee'ni

23 **423. Fayyimmate ogeeyye milli yaatta gede fajjitinnohe?**

24  Ee

25  Dee'ni

26 **424. Gamete yannara itattara woyi agattara hasi'rattani?**

27  Ee

28  Dee'ni

29 **425. Fayyimmate ogeeyye itattara woyi agattara fajjitinnohe?**

30  Ee

31  Dee'ni

1 **426. Ilatta woyite hedhahera hasirootta ofolla woyi goxa doodhotani?**

2  Ee

3  Dee'ni

4 **427. Fayyimmate ogeessi ati doodhotta bayichcho heedhe ilattara fajjinnohe?**

5  Ee

6  Dee'ni

7  xa'ma waaje dixam'ooma

8 **428. Gamete yannara budunni ilanno meentira assinannire atera assinahera hasi'rittani?**

9  Ee

10  Dee'ni

11 **429. Fayyimmate ogeeyye gamete yannara budunni amuwaho assinannire atera assinahera fajjitinnohe?**

12  Ee

13  Dee'ni

14  xa'ma waaje dixam'ooma

15 **430. Fayyimmate ogeeyye ati hasi'rittakkinni Hospitaalete keeshshatta gede assitannoheni?**

16  Ee

17  Dee'ni

18 **431. Fayyimmate ogeeyye amma'na, daga, diro, dagoommittete garanna keeranchimma kaima assite wolu mannira assinannihunni baxxino garinni lainohen?**

19  Ee

20  Dee'ni

# Reporting checklist for quality improvement study.

Based on the SQUIRE guidelines.

## Instructions to authors

Complete this checklist by entering the page numbers from your manuscript where readers will find each of the items listed below.

Your article may not currently address all the items on the checklist. Please modify your text to include the missing information. If you are certain that an item does not apply, please write "n/a" and provide a short explanation.

Upload your completed checklist as an extra file when you submit to a journal.

In your methods section, say that you used the SQUIRE reporting guidelines, and cite them as:

Ogrinc G, Davies L, Goodman D, Batalden P, Davidoff F, Stevens D. SQUIRE 2.0 (Standards for Quality Improvement Reporting Excellence): revised publication guidelines from a detailed consensus process

|                    | Reporting Item                                                                                                                                                                                                         | Page Number |
|--------------------|------------------------------------------------------------------------------------------------------------------------------------------------------------------------------------------------------------------------|-------------|
| <b>Title</b>       |                                                                                                                                                                                                                        |             |
| <a href="#">#1</a> | Indicate that the manuscript concerns an initiative to improve healthcare (broadly defined to include the quality, safety, effectiveness, patientcenteredness, timeliness, cost, efficiency, and equity of healthcare) | 1           |

## Abstract

[#02a](#) Provide adequate information to aid in searching and indexing 2

[#02b](#) Summarize all key information from various sections of the text using the abstract format of the intended publication or a structured summary such as: background, local problem, methods, interventions, results, conclusions 2

## Introduction

[#3](#) Nature and significance of the local problem description 4

[#4](#) Available knowledge Summary of what is currently known about the problem, including relevant previous studies 4,5,6

[#5](#) Rationale Informal or formal frameworks, models, concepts, and / or theories used to explain the problem, any reasons or assumptions that were used to develop the intervention(s), and reasons why the intervention(s) was expected to work 5,6

[#6](#) Specific aims Purpose of the project and of this report 6

## Methods

[#7](#) Context Contextual elements considered important at the outset of introducing the intervention(s) 6,7

[#08a](#) Intervention(s) Description of the intervention(s) in sufficient detail that others could reproduce it 7,8,9

|    |                 |                      |                                                                   |          |
|----|-----------------|----------------------|-------------------------------------------------------------------|----------|
| 1  | Intervention(s) | <a href="#">#08b</a> | Specifics of the team involved in the work                        | 8,9      |
| 2  |                 |                      |                                                                   |          |
| 3  |                 |                      |                                                                   |          |
| 4  | Study of the    | <a href="#">#09a</a> | Approach chosen for assessing the impact of the                   | 10,11,12 |
| 5  |                 |                      |                                                                   |          |
| 6  | Intervention(s) |                      | intervention(s)                                                   |          |
| 7  |                 |                      |                                                                   |          |
| 8  |                 |                      |                                                                   |          |
| 9  |                 |                      |                                                                   |          |
| 10 | Study of the    | <a href="#">#09b</a> | Approach used to establish whether the observed outcomes          | 12,13    |
| 11 |                 |                      |                                                                   |          |
| 12 | Intervention(s) |                      | were due to the intervention(s)                                   |          |
| 13 |                 |                      |                                                                   |          |
| 14 |                 |                      |                                                                   |          |
| 15 | Measures        | <a href="#">#10a</a> | Measures chosen for studying processes and outcomes of            | 10,11    |
| 16 |                 |                      |                                                                   |          |
| 17 |                 |                      | the intervention(s), including rationale for choosing them,       |          |
| 18 |                 |                      |                                                                   |          |
| 19 |                 |                      | their operational definitions, and their validity and reliability |          |
| 20 |                 |                      |                                                                   |          |
| 21 |                 |                      |                                                                   |          |
| 22 |                 |                      |                                                                   |          |
| 23 | Measures        | <a href="#">#10b</a> | Description of the approach to the ongoing assessment of          | NA       |
| 24 |                 |                      |                                                                   |          |
| 25 |                 |                      | contextual elements that contributed to the success, failure,     |          |
| 26 |                 |                      |                                                                   |          |
| 27 |                 |                      | efficiency, and cost                                              |          |
| 28 |                 |                      |                                                                   |          |
| 29 |                 |                      |                                                                   |          |
| 30 | Measures        | <a href="#">#10c</a> | Methods employed for assessing completeness and accuracy          | 11,12    |
| 31 |                 |                      |                                                                   |          |
| 32 |                 |                      | of data                                                           |          |
| 33 |                 |                      |                                                                   |          |
| 34 |                 |                      |                                                                   |          |
| 35 |                 |                      |                                                                   |          |
| 36 | Analysis        | <a href="#">#11a</a> | Qualitative and quantitative methods used to draw inferences      | 12,13    |
| 37 |                 |                      |                                                                   |          |
| 38 |                 |                      | from the data                                                     |          |
| 39 |                 |                      |                                                                   |          |
| 40 |                 |                      |                                                                   |          |
| 41 | Analysis        | <a href="#">#11b</a> | Methods for understanding variation within the data, including    | 12       |
| 42 |                 |                      |                                                                   |          |
| 43 |                 |                      | the effects of time as a variable                                 |          |
| 44 |                 |                      |                                                                   |          |
| 45 |                 |                      |                                                                   |          |
| 46 | Ethical         | <a href="#">#12</a>  | Ethical aspects of implementing and studying the                  | 22       |
| 47 |                 |                      |                                                                   |          |
| 48 | considerations  |                      | intervention(s) and how they were addressed, including, but       |          |
| 49 |                 |                      |                                                                   |          |
| 50 |                 |                      | not limited to, formal ethics review and potential conflict(s) of |          |
| 51 |                 |                      |                                                                   |          |
| 52 |                 |                      | interest                                                          |          |
| 53 |                 |                      |                                                                   |          |
| 54 |                 |                      |                                                                   |          |
| 55 |                 |                      |                                                                   |          |
| 56 | <b>Results</b>  |                      |                                                                   |          |
| 57 |                 |                      |                                                                   |          |
| 58 |                 |                      |                                                                   |          |
| 59 |                 |                      |                                                                   |          |
| 60 |                 |                      |                                                                   |          |

|    |                      |                                                                                      |          |
|----|----------------------|--------------------------------------------------------------------------------------|----------|
| 1  | <a href="#">#13a</a> | Initial steps of the intervention(s) and their evolution over time                   | 8; Supp. |
| 2  |                      | (e.g., time-line diagram, flow chart, or table), including                           | file 6   |
| 3  |                      | modifications made to the intervention during the project                            |          |
| 4  |                      |                                                                                      |          |
| 5  |                      |                                                                                      |          |
| 6  |                      |                                                                                      |          |
| 7  |                      |                                                                                      |          |
| 8  |                      |                                                                                      |          |
| 9  | <a href="#">#13b</a> | Details of the process measures and outcome                                          | 14,15,16 |
| 10 |                      |                                                                                      |          |
| 11 |                      |                                                                                      |          |
| 12 | <a href="#">#13c</a> | Contextual elements that interacted with the intervention(s)                         | 15,16    |
| 13 |                      |                                                                                      |          |
| 14 |                      |                                                                                      |          |
| 15 | <a href="#">#13d</a> | Observed associations between outcomes, interventions, and                           | 15,16    |
| 16 |                      | relevant contextual elements                                                         |          |
| 17 |                      |                                                                                      |          |
| 18 |                      |                                                                                      |          |
| 19 |                      |                                                                                      |          |
| 20 | <a href="#">#13e</a> | Unintended consequences such as unexpected benefits,                                 | NA       |
| 21 |                      | problems, failures, or costs associated with the                                     |          |
| 22 |                      | intervention(s).                                                                     |          |
| 23 |                      |                                                                                      |          |
| 24 |                      |                                                                                      |          |
| 25 |                      |                                                                                      |          |
| 26 |                      |                                                                                      |          |
| 27 |                      |                                                                                      |          |
| 28 | <a href="#">#13f</a> | Details about missing data                                                           | NA       |
| 29 |                      |                                                                                      |          |
| 30 |                      |                                                                                      |          |
| 31 | <b>Discussion</b>    |                                                                                      |          |
| 32 |                      |                                                                                      |          |
| 33 |                      |                                                                                      |          |
| 34 | Summary              | <a href="#">#14a</a> Key findings, including relevance to the rationale and specific | 17       |
| 35 |                      | aims                                                                                 |          |
| 36 |                      |                                                                                      |          |
| 37 |                      |                                                                                      |          |
| 38 |                      |                                                                                      |          |
| 39 | Summary              | <a href="#">#14b</a> Particular strengths of the project                             | 17,20    |
| 40 |                      |                                                                                      |          |
| 41 |                      |                                                                                      |          |
| 42 | Interpretation       | <a href="#">#15a</a> Nature of the association between the intervention(s) and the   | 17,18    |
| 43 |                      | outcomes                                                                             |          |
| 44 |                      |                                                                                      |          |
| 45 |                      |                                                                                      |          |
| 46 |                      |                                                                                      |          |
| 47 |                      |                                                                                      |          |
| 48 | Interpretation       | <a href="#">#15b</a> Comparison of results with findings from other publications     | 17-20    |
| 49 |                      |                                                                                      |          |
| 50 |                      |                                                                                      |          |
| 51 | Interpretation       | <a href="#">#15c</a> Impact of the project on people and systems                     | 18-20    |
| 52 |                      |                                                                                      |          |
| 53 |                      |                                                                                      |          |
| 54 | Interpretation       | <a href="#">#15d</a> Reasons for any differences between observed and                | 18,19    |
| 55 |                      | anticipated outcomes, including the influence of context                             |          |
| 56 |                      |                                                                                      |          |
| 57 |                      |                                                                                      |          |
| 58 |                      |                                                                                      |          |
| 59 |                      |                                                                                      |          |
| 60 |                      |                                                                                      |          |

|    |                    |                      |                                                               |       |
|----|--------------------|----------------------|---------------------------------------------------------------|-------|
| 1  | Interpretation     | <a href="#">#15e</a> | Costs and strategic trade-offs, including opportunity costs   | NA    |
| 2  |                    |                      |                                                               |       |
| 3  |                    |                      |                                                               |       |
| 4  | Limitations        | <a href="#">#16a</a> | Limits to the generalizability of the work                    | 20,21 |
| 5  |                    |                      |                                                               |       |
| 6  |                    |                      |                                                               |       |
| 7  | Limitations        | <a href="#">#16b</a> | Factors that might have limited internal validity such as     | 20,21 |
| 8  |                    |                      | confounding, bias, or imprecision in the design, methods,     |       |
| 9  |                    |                      | measurement, or analysis                                      |       |
| 10 |                    |                      |                                                               |       |
| 11 |                    |                      |                                                               |       |
| 12 |                    |                      |                                                               |       |
| 13 |                    |                      |                                                               |       |
| 14 |                    |                      |                                                               |       |
| 15 | Limitations        | <a href="#">#16c</a> | Efforts made to minimize and adjust for limitations           | 20    |
| 16 |                    |                      |                                                               |       |
| 17 |                    |                      |                                                               |       |
| 18 | Conclusion         | <a href="#">#17a</a> | Usefulness of the work                                        | 21    |
| 19 |                    |                      |                                                               |       |
| 20 |                    |                      |                                                               |       |
| 21 | Conclusion         | <a href="#">#17b</a> | Sustainability                                                | 21    |
| 22 |                    |                      |                                                               |       |
| 23 |                    |                      |                                                               |       |
| 24 | Conclusion         | <a href="#">#17c</a> | Potential for spread to other contexts                        | 21    |
| 25 |                    |                      |                                                               |       |
| 26 |                    |                      |                                                               |       |
| 27 | Conclusion         | <a href="#">#17d</a> | Implications for practice and for further study in the field  | 21    |
| 28 |                    |                      |                                                               |       |
| 29 |                    |                      |                                                               |       |
| 30 | Conclusion         | <a href="#">#17e</a> | Suggested next steps                                          | 21    |
| 31 |                    |                      |                                                               |       |
| 32 |                    |                      |                                                               |       |
| 33 |                    |                      |                                                               |       |
| 34 | <b>Other</b>       |                      |                                                               |       |
| 35 |                    |                      |                                                               |       |
| 36 | <b>information</b> |                      |                                                               |       |
| 37 |                    |                      |                                                               |       |
| 38 |                    |                      |                                                               |       |
| 39 | Funding            | <a href="#">#18</a>  | Sources of funding that supported this work. Role, if any, of | 22    |
| 40 |                    |                      | the funding organization in the design, implementation,       |       |
| 41 |                    |                      | interpretation, and reporting                                 |       |
| 42 |                    |                      |                                                               |       |
| 43 |                    |                      |                                                               |       |
| 44 |                    |                      |                                                               |       |
| 45 |                    |                      |                                                               |       |

None The SQUIRE 2.0 checklist is distributed under the terms of the Creative Commons Attribution License CC BY-NC 4.0. This checklist can be completed online using <https://www.goodreports.org/>, a tool made by the [EQUATOR Network](#) in collaboration with [Penelope.ai](#)

# BMJ Open

## Mitigating the mistreatment of childbearing women: Evaluation of respectful maternity care intervention in Ethiopian hospitals

|                                 |                                                                                                                                                                                                                                                                                                                                                                                                                                                                                                                                                                                                                                                  |
|---------------------------------|--------------------------------------------------------------------------------------------------------------------------------------------------------------------------------------------------------------------------------------------------------------------------------------------------------------------------------------------------------------------------------------------------------------------------------------------------------------------------------------------------------------------------------------------------------------------------------------------------------------------------------------------------|
| Journal:                        | <i>BMJ Open</i>                                                                                                                                                                                                                                                                                                                                                                                                                                                                                                                                                                                                                                  |
| Manuscript ID                   | bmjopen-2020-038871.R2                                                                                                                                                                                                                                                                                                                                                                                                                                                                                                                                                                                                                           |
| Article Type:                   | Original research                                                                                                                                                                                                                                                                                                                                                                                                                                                                                                                                                                                                                                |
| Date Submitted by the Author:   | 21-Jul-2020                                                                                                                                                                                                                                                                                                                                                                                                                                                                                                                                                                                                                                      |
| Complete List of Authors:       | Asefa, Anteneh; Hawassa University College of Medicine and Health Sciences, School of Public Health ; The University of Melbourne Nossal Institute for Global Health<br>Morgan, Alison; The University of Melbourne Nossal Institute for Global Health<br>Gebremedhin, Samson; Addis Ababa University College of Health Sciences, School of Public Health<br>Lemango , Ephrem; Federal Ministry of Health , Maternal and Child Health Directorate<br>Abebe, Sintayehu; Amref Health Africa in Ethiopia<br>Magge, Hema; Institute for Healthcare Improvement<br>Kermode, Michelle; The University of Melbourne Nossal Institute for Global Health |
| <b>Primary Subject Heading</b>: | Health services research                                                                                                                                                                                                                                                                                                                                                                                                                                                                                                                                                                                                                         |
| Secondary Subject Heading:      | Public health                                                                                                                                                                                                                                                                                                                                                                                                                                                                                                                                                                                                                                    |
| Keywords:                       | Clinical audit < HEALTH SERVICES ADMINISTRATION & MANAGEMENT, Quality in health care < HEALTH SERVICES ADMINISTRATION & MANAGEMENT, PUBLIC HEALTH                                                                                                                                                                                                                                                                                                                                                                                                                                                                                                |
|                                 |                                                                                                                                                                                                                                                                                                                                                                                                                                                                                                                                                                                                                                                  |

SCHOLARONE™  
Manuscripts



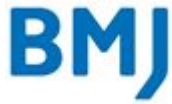

I, the Submitting Author has the right to grant and does grant on behalf of all authors of the Work (as defined in the below author licence), an exclusive licence and/or a non-exclusive licence for contributions from authors who are: i) UK Crown employees; ii) where BMJ has agreed a CC-BY licence shall apply, and/or iii) in accordance with the terms applicable for US Federal Government officers or employees acting as part of their official duties; on a worldwide, perpetual, irrevocable, royalty-free basis to BMJ Publishing Group Ltd ("BMJ") its licensees and where the relevant Journal is co-owned by BMJ to the co-owners of the Journal, to publish the Work in this journal and any other BMJ products and to exploit all rights, as set out in our [licence](#).

The Submitting Author accepts and understands that any supply made under these terms is made by BMJ to the Submitting Author unless you are acting as an employee on behalf of your employer or a postgraduate student of an affiliated institution which is paying any applicable article publishing charge ("APC") for Open Access articles. Where the Submitting Author wishes to make the Work available on an Open Access basis (and intends to pay the relevant APC), the terms of reuse of such Open Access shall be governed by a Creative Commons licence – details of these licences and which [Creative Commons](#) licence will apply to this Work are set out in our licence referred to above.

Other than as permitted in any relevant BMJ Author's Self Archiving Policies, I confirm this Work has not been accepted for publication elsewhere, is not being considered for publication elsewhere and does not duplicate material already published. I confirm all authors consent to publication of this Work and authorise the granting of this licence.

1 Mitigating the mistreatment of childbearing women: Evaluation of respectful maternity care  
2 intervention in Ethiopian hospitals  
3

4 Anteneh Asefa\*, Alison Morgan, Samson Gebremedhin, Ephrem Tekle Lemango, Sintayehu  
5 Abebe, Hema Magge, Michelle Kermode  
6  
7

8  
9 \*Corresponding author

10 Anteneh Asefa

- 11 • School of Public Health, College of Medicine and Health Sciences, Hawassa University,  
12 Hawassa, Ethiopia; [antex98@yahoo.com](mailto:antex98@yahoo.com)
- 13 • Nossal Institute for Global Health, School of Population and Global Health, University of  
14 Melbourne, Melbourne, Australia

15  
16 Co-authors

17 Alison Morgan

- 18 • Nossal Institute for Global Health, School of Population and Global Health, University of  
19 Melbourne, Melbourne, Australia; [alison.morgan@unimelb.edu.au](mailto:alison.morgan@unimelb.edu.au)

20 Samson Gebremedhin

- 21 • School of Public Health, College of Medicine and Health Sciences, Addis Ababa  
22 University, Addis Ababa, Ethiopia; [samsongmgs@yahoo.com](mailto:samsongmgs@yahoo.com)

23 Ephrem Tekle

- 24 • Maternal and Child Health Directorate, Ministry of Health, Federal Democratic Republic  
25 of Ethiopia, Addis Ababa, Ethiopia; [eplemango@gmail.com](mailto:eplemango@gmail.com)

26 Sintayehu Abebe

- 27 • Amref Health Africa in Ethiopia, Addis Ababa, Ethiopia; [sintayehumoh@gmail.com](mailto:sintayehumoh@gmail.com)

28 Hema Magge

- 29 • Institute for Healthcare Improvement, Boston, MA, USA; [hmagge@ihi.org](mailto:hmagge@ihi.org)
- 30 • Division of Global Health Equity, Brigham and Women's Hospital, Boston, MA, USA
- 31 • Division of General Pediatrics, Boston Children's Hospital, Boston, MA, USA

32 Michelle Kermode

- 33 • Nossal Institute for Global Health, School of Population and Global Health, University of  
34 Melbourne, Melbourne, Australia; [mkermode@unimelb.edu.au](mailto:mkermode@unimelb.edu.au)

## Abstract

**Objectives:** There is a lack of evidence on approaches to mitigating mistreatment during facility-based childbirth. This study compares the experiences of mistreatment reported by childbearing women before and after implementation of a respectful maternity care intervention.

**Design:** A pre-post study design was undertaken to quantify changes in women's experiences of mistreatment during facility-based childbirth before and after the respectful maternity care intervention.

**Intervention:** A respectful maternity care intervention was implemented in three hospitals in southern Ethiopia between December 2017 and September 2018 and it included training of service providers, placement of wall posters in labour rooms, and post-training supportive visits for quality improvement.

**Outcome measures:** A 25-item questionnaire asking women about mistreatment experiences was administered to 388 women (198 in the pre-intervention, 190 in the post-intervention). The outcome variable was the number of mistreatment components experienced by women, expressed as a score out of 25. Multilevel mixed-effects Poisson modelling was used to assess the change in mistreatment score from pre-to post-intervention periods.

**Results:** The number of mistreatment components experienced by women was reduced by 18% when the post-intervention group was compared with the pre-intervention group (adjusted regression coefficient ( $A\beta$ )=0.82, 95%CI: 0.74-0.91). Women who had a complication during pregnancy ( $A\beta$ =1.17, 95%CI: 1.01-1.34) and delivery ( $A\beta$ =1.16, 95%CI: 1.03-1.32) experienced a greater number of mistreatment components. On the other hand, women who delivered by caesarean delivery after trial of vaginal delivery ( $A\beta$ =0.76, 95%CI: 0.63-0.92) and caesarean delivery without trial of vaginal delivery ( $A\beta$ =0.68, 95%CI: 0.47-0.98) experienced a lesser number of mistreatment components compared to those who had vaginal delivery.

1 **Conclusions:** Women reported significantly fewer mistreatment experiences during childbirth  
2 following implementation of the intervention. Given the variety of factors that lead to  
3 mistreatment in health facilities, interventions designed to mitigate mistreatment need to involve  
4 structural changes.  
5  
6  
7  
8

9 **Keywords:** mistreatment, respectful maternity care, intervention, pre-intervention, post-  
10 intervention  
11  
12  
13

### 14 **Strengths and limitations of this study**

- 16 • This is the first study to test the effectiveness of a respectful maternity care intervention  
17 in Ethiopia.
- 18 • Comparing the counts of mistreatment components captures the diversity of  
19 mistreatment that would not have been possible by simple prevalence measures.
- 20 • Treating hospitals as random-effects controls for the impact of other interventions that  
21 may have happened around the same time in those facilities.
- 22 • Mistreatment components experienced by women were assessed using binary options  
23 (yes/no) questions which ignore multiple incidents of a mistreatment component.
- 24 • An exit survey of women is prone to recall bias in acquiring data on multiple incidents of  
25 mistreatment that would have been minimised by labour observation.  
26  
27  
28  
29  
30  
31  
32  
33  
34  
35  
36  
37  
38  
39  
40  
41  
42  
43  
44  
45  
46  
47  
48  
49  
50  
51  
52  
53  
54  
55  
56  
57  
58  
59  
60

## Introduction

Despite the remarkable decline in maternal mortality worldwide, around 800 women die each day due to preventable conditions that emerge in the course of pregnancy and childbirth.<sup>1</sup>

According to the World Health Organization's (WHO) estimates, 295,000 maternal deaths occurred in 2017, of which 4.7% occurred in Ethiopia.<sup>1</sup> Low utilization of maternal health care services, especially care during childbirth, is a key challenge to reducing maternal mortality.<sup>2,3</sup>

In 2019, only 47.5% of women delivered in health facilities in Ethiopia.<sup>4</sup>

Women's negative experiences and/or other women's negative experiences of facility-based childbirth are commonly reported reasons for not attending a health facility at the time of delivery.<sup>5-8</sup> These experiences include hostile or insensitive staff<sup>7</sup>, disallowance of birth companions<sup>6,7</sup>, disrespectful care<sup>9-11</sup>, women's lack of autonomy<sup>8</sup>, poor reception at health facilities<sup>6</sup>, lack of privacy<sup>6,7</sup>, unfriendly staff<sup>12</sup>, abusive care<sup>12</sup>, and poor readiness of health facilities.<sup>12</sup> The attitudes, actions and system barriers that contribute to such negative experiences are nowadays labelled as mistreatment or disrespect and abuse. However, an internationally agreed definition of mistreatment or disrespect and abuse still lacks as behaviours that are acceptable to women in some contexts may be unacceptable to women in different contexts.

There is compelling evidence from many countries on the negative impact of mistreatment on the uptake of facility-based childbirth. An evidence synthesis of studies from 16 low and middle-income countries (LMICs) and China revealed that mistreatment during childbirth is a powerful deterrent to facility-based childbirth.<sup>13</sup> Additionally, studies from Afghanistan<sup>14</sup>, Bolivia<sup>15</sup>, Ghana<sup>16</sup>, Kenya<sup>17,18</sup>, Tanzania<sup>19</sup>, Malawi<sup>20</sup>, and India<sup>21</sup> have clearly reported disrespectful care at birth as a key deterrent to facility-based childbirth.

The body of knowledge on mistreatment is still emerging and evolving, hence methodological approaches to estimate levels of mistreatment differ across settings, thereby making comparison challenging.<sup>22,23</sup> Prevalence studies conducted in different parts of Ethiopia

1 between 2013 and 2017 report many examples of mistreatment ranging from non-consented  
2 care, non-confidential care, discriminatory care, abandonment of care, non-dignified care, to  
3 physical abuse during facility-based childbirth.<sup>24-28</sup>  
4

5  
6  
7 The 2014 WHO statement, which condemns all forms of mistreatment during facility-based  
8 childbirth, identifies five actions to prevent and eliminate mistreatment globally. The statement  
9 calls for: evidence synthesis on the effectiveness of interventions that aim to improve respectful  
10 maternity care and thereby mitigate mistreatment, defining and measuring mistreatment, and  
11 inculcating service providers with the culture of respectful care at the time of birth.<sup>29</sup> Following  
12 this, various studies, including a multi-country study led by WHO, have been conducted to  
13 review and synthesize methodological frameworks for research on mistreatment.<sup>13, 22, 23, 30-32</sup>  
14 However, implementation research to assess the effectiveness of interventions to halt  
15 mistreatment have not been reported in Ethiopia.  
16  
17

18  
19  
20 In the move towards mitigating mistreatment, a focus on respectful maternity care is growing  
21 globally, and the 'Universal Rights of Childbearing Women' has been endorsed in several  
22 countries.<sup>33</sup> WHO defines respectful maternity care as "the care organized for and provided to  
23 all women in a manner that maintains their dignity, privacy and confidentiality, ensures freedom  
24 from harm and mistreatment, and enables informed choice and continuous support during  
25 labour and childbirth".<sup>34</sup>  
26  
27

28  
29  
30 With the aim of meeting the maternal mortality targets of the Sustainable Development Goals  
31 (SDG), strategies for ending preventable maternal mortality were introduced in 2015. The  
32 strategy calls for health systems not to neglect respectful maternity care while endeavouring to  
33 deliver effective clinical interventions.<sup>35</sup> WHO's framework for quality maternal and newborn  
34 health care reinforces the important role of respectful maternity care, and identifies respect and  
35 preservation of dignity as one of the eight domains of quality of care.<sup>36</sup> Additionally, in 2018,  
36 WHO released guidelines for a positive childbirth experience which recommend respectful  
37 maternity care throughout labour and birth for all women.<sup>34</sup> A recent WHO paper published in  
38  
39  
40  
41  
42  
43  
44  
45  
46  
47  
48  
49  
50  
51  
52  
53  
54  
55  
56  
57  
58  
59  
60

1 The Lancet that found high levels of mistreatment in four countries also highlighted the need for  
2 an urgent action to promote the provision of respectful maternity care worldwide.<sup>37</sup>  
3  
4

5 The government of Ethiopia launched a national movement entitled “the caring, respectful, and  
6 compassionate (CRC) health workforce” in 2016. The initiative is one of the four health sector  
7 transformation agendas aiming to achieve health targets set for the five years between 2015/16  
8 – 2020/21.<sup>38</sup> However, respectful maternity care initiatives are in early-stage development and  
9 currently limited to a few pilot health facilities and technically supported by international partner  
10 organizations. Consequently, there is an evidence gap regarding implementation of effective  
11 respectful maternity care interventions in the country.  
12  
13  
14  
15  
16  
17  
18  
19  
20

21 This study was undertaken to assess women’s experiences of mistreatment during facility-  
22 based childbirth before and after implementation of an intervention that was designed to  
23 improve the quality of care women receive during childbirth in hospitals. Previous respectful  
24 maternity care intervention studies from Kenya<sup>39</sup> and Tanzania<sup>40, 41</sup> revealed a significant  
25 reduction in the level of mistreatment and an improved attitude of service providers towards  
26 women, as a consequence of the interventions. This study is part of a broader interventional  
27 mixed methods study that aimed to identify health system challenges to the implementation of  
28 RMC and potential solutions to address these challenges. Lessons drawn from the respectful  
29 maternity care training and its implementation (Asefa et al. Lessons learned through respectful  
30 maternity care training and its implementation in Ethiopia: An interventional mixed methods  
31 study) and health system constraints to the promotion of respectful maternity care in Ethiopian  
32 hospitals (Asefa et al. Imagining maternity care as a complex adaptive system: understanding  
33 health system constraints to the promotion of respectful maternity care) are reported elsewhere.  
34  
35  
36  
37  
38  
39  
40  
41  
42  
43  
44  
45  
46  
47  
48  
49  
50  
51  
52  
53  
54  
55  
56  
57  
58  
59  
60

## Materials and methods

### Study setting

This study was undertaken in three hospitals located in the Southern Nations Nationalities and Peoples Region (SNNPR), Ethiopia. Health services in Ethiopia are organized in three tiers: health posts, health centres, and primary hospitals are in the first tier; the second tier consists of general hospitals; and the third tier, specialized hospitals.<sup>38</sup> In principle, general hospitals are designed to serve a catchment population of 1-1.5 million people whereas primary hospitals are expected to serve 60,000 - 100,000 people. One of the study hospitals, Leku, is a primary hospital reported to be serving a catchment population of 261,271 including an estimated 8000 women who give birth each year. The other two hospitals, Adare and Yirgalem, are general hospitals serving a catchment population of 359,358 and 267,589, respectively. An estimated 10,000 and 9,000 pregnant women give birth each year in the catchments of Adare and Yirgalem hospitals, respectively. The hospitals were selected purposively taking into consideration their geographical proximity and their varying level in the tiers of the Ethiopian health system. The intervention involved only these three hospitals. None of hospitals have a private labour ward or birthing room which means that several women labour in the same room and give birth in one birthing room.

### Study design

This study is part of a mixed-methods implementation research study that was conducted to identify health system constraints to the promotion of respectful maternity care and to develop and assess mitigation approaches. A pre-post study that involved no comparison group was undertaken between December 2017 and September 2018 to quantify changes in women's experiences of mistreatment during facility-based childbirth. Women who delivered in the study hospitals were surveyed at the time of discharge; the pre-intervention surveys were conducted in March 2018, whereas the post-intervention surveys were conducted in July and August 2018.

### Description of the intervention



1 The intervention included: training of service providers, placement of wall posters in labour  
2 rooms, and post-training supportive visits for quality improvement. Each of these are described  
3 below.  
4  
5

6  
7 The training of service providers involved a three-day workshop using a respectful maternity  
8 care training manual developed for this intervention. The manual was drafted by maternal health  
9 researchers from Ethiopia and Australia after review of previous respectful maternity care  
10 training manuals designed for low-income settings (Kenya<sup>42</sup>, Tanzania<sup>43</sup>, and Nigeria<sup>44</sup>),  
11 international human rights declarations<sup>33, 45, 46</sup>, national professional codes of ethics, and  
12 national training manuals on maternity care and quality improvement. The manual includes an  
13 overview of maternal health in Ethiopia. It covers topics such as human rights and law in the  
14 context of reproductive health, respectful maternity care rights and standards, professional  
15 ethics, and continuous quality improvement. The draft manual was reviewed by three senior  
16 maternal health experts at the Federal Ministry of Health and SNNPR Health Bureau for its  
17 content and applicability in the Ethiopian context. Two rounds of three-day respectful maternity  
18 care training sessions were conducted at Hawassa University Comprehensive Specialized  
19 Teaching Hospital. The training was interactive and deployed various teaching methods  
20 including presentations, role plays, demonstrations, case studies, individual readings, video  
21 shows, and a hospital visit. Training sessions were facilitated by the principal investigator, a  
22 senior maternal health expert from the SNNPR health bureau, and a senior obstetrician-  
23 gynaecologist. A total of 64 health service providers participated in the training, 33 in the first  
24 round and 31 in the second round (all were staff from the participating hospitals). Fifty-two were  
25 midwives, whereas the remaining were integrated emergency surgical officers (4), general  
26 practitioners (3), nurses (3), and health officers (2). The SNNPR health bureau and hospital  
27 administrations communicated their expectation that all service providers at the participating  
28 hospitals who assist women during childbirth should attend the training. In reality, all eligible  
29 service providers from Adare (26) and Leku (21) hospitals attended the training sessions. Five  
30  
31  
32  
33  
34  
35  
36  
37  
38  
39  
40  
41  
42  
43  
44  
45  
46  
47  
48  
49  
50  
51  
52  
53  
54  
55  
56  
57  
58  
59  
60

1 among the 22 eligible service providers from Yirgalem hospital did not attend the training  
2 sessions for personal reasons.  
3

4  
5 Five types of wall posters (four in English and one in Amharic) were distributed to the hospitals  
6 following completion of the service provider training. The posters were displayed in labour wards  
7 and waiting rooms to serve as job aids for service providers who are trained in English to  
8 become health professionals and who generally use service guidelines and reporting formats  
9 prepared in English. One of the English version wall posters lists the universal rights of  
10 childbearing women prepared by the White Ribbon Alliance.<sup>33</sup> The remaining three are  
11 infographics taken from the intrapartum care for a positive childbirth experience guideline  
12 prepared by the World Health Organization.<sup>34</sup> The Amharic version poster described the  
13 manifestations of mistreatment during facility-based childbirth and the universal rights of  
14 childbearing women endorsed by the Federal Ministry of Health, Ethiopia.  
15  
16  
17  
18  
19  
20  
21  
22  
23  
24  
25  
26

27 Two rounds of post-training quality improvement supportive supervision visits were conducted  
28 by the principal investigator and a senior maternal health expert in all hospitals at two-week  
29 intervals, in June and July of 2018. During the initial visit, a facility-led assessment of maternity  
30 care settings was conducted using a structured checklist that was part of the health providers'  
31 training [Supplementary file 1]. The checklist included 32 respectful maternity care standards  
32 that were assessed using observation, interview, and review of documents; the standards were  
33 grouped into five categories. Action plans were developed by service providers to address  
34 actionable gaps identified by the respectful maternity care standards assessment. The gaps that  
35 could not be addressed at the labour ward level were passed to hospital administrators for  
36 further actions [Supplementary file 1]. During the second visit, similar steps were undertaken to  
37 see changes as a result of the initial action plan and promote continuous quality improvement  
38 as a routine process. Detailed information on the sequencing of the interventions and the timing  
39 of data collection for the broader study, including the current study, is appended [Supplementary  
40 file 2].  
41  
42  
43  
44  
45  
46  
47  
48  
49  
50  
51  
52  
53  
54  
55  
56  
57  
58  
59  
60

## Participants and procedures

Pregnant women who gave birth in the study hospitals were eligible for inclusion in the study regardless of their mode of delivery (natural or operative) or birth outcome. Once women had completed their discharge requirements and procedures, they were invited to participate in the study and were consecutively enrolled until the required sample size was achieved for each study hospital.

## Sample size and sampling

Stata 14 software was used to calculate the sample size for this study using the menu option for determining the difference between two sample means with the assumption of: an anticipated mean count of mistreatment experiences women face in facility-based childbirth (pre-intervention) of 4.91, taken from a study conducted in Addis Ababa<sup>26</sup>; an anticipated mean count of mistreatment experiences women face in facility-based childbirth (post-intervention) of 3.96 (mean difference of 0.95); statistical power of 90%; an allocation ratio of 1:1 between the pre and post-intervention groups; 0.05 level of significance; and 10% non-response rate.

Additionally, women receiving care in the same hospital are more likely to receive comparable care during childbirth, so the sample size was adjusted for clustering by assuming a clustering effect of 2. With these assumptions, the minimum required sample size was calculated to be 378 (189 in the pre-intervention group and 189 in the post-intervention group). Eventually, 392 women were invited and 388 women were surveyed (190 in the pre-intervention and 198 in the post-intervention) making the response rate 98.9%; rushing to go home and lack of interest to participate were the reasons for non-participation. Allocation of samples to the three hospitals was made proportionately depending on the number of women who delivered in the hospitals in the last quarter of 2017 for the pre-intervention survey, and the second quarter of 2018 for the post-intervention survey. Accordingly, 172 (87 pre-intervention, 85 post-intervention) women were surveyed from Adare hospital, whereas 86 (46 pre-intervention, 40 post-intervention) and 130 (65 pre-intervention, 65 post-intervention) were from Leku and Yirgalem hospitals,

1 respectively. Eligible women were enrolled into the study consecutively until the required  
2 sample size was met.  
3

#### 4 **Variables and outcome measures**

5 The survey included 25 questions about women's experiences of childbirth in the study  
6 hospitals (Table 1). The questions pertained to six categories: verbal abuse; physical abuse;  
7 non-consented care; lack of information, privacy and confidentiality; neglect and discrimination;  
8 and refusal of preference. The responses consisted of dichotomised mutually exclusive options  
9 set as "yes" or "no". The outcome variable was a count variable computed from the 25 variables  
10 clustered into the categories mentioned above; the number of mistreatment components women  
11 experienced were counted as a score out of 25; maximum possible score being 25 and  
12 minimum 0.  
13  
14  
15  
16  
17  
18  
19  
20  
21  
22  
23

24 The main independent variable of the study was whether the woman belongs to the pre-  
25 intervention group or the post-intervention group, i.e. whether she was hospitalised before or  
26 after the intervention. The other independent variables, i.e. potential confounders that were  
27 considered for adjustment were: sociodemographic (place of residence, age, age at first  
28 marriage, marital status, educational status, occupation, religion, ethnicity, monthly income,  
29 number of children); obstetric characteristics (complication/s during pregnancy and delivery,  
30 type of delivery, intervention/s for vaginal delivery); service utilisation history (antenatal visits,  
31 history of facility-based delivery); service-related (referral status, time of admission, hours of  
32 stay, gender of service provider)  
33  
34  
35  
36  
37  
38  
39  
40  
41  
42  
43

#### 44 **Questionnaire development**

45 The survey questionnaire was developed as per the recommendations of a comparative  
46 analysis of five prevalence studies of mistreatment that were conducted in sub-Saharan Africa  
47 countries, including Ethiopia.<sup>22</sup> Additionally, the typology suggested by a mixed-methods  
48 systematic review on mistreatment during facility-based childbirth<sup>23</sup> was used to refine and  
49 group the 25 questions with some modifications. The questionnaire was originally prepared in  
50  
51  
52  
53  
54  
55  
56  
57  
58  
59  
60

1 English and later translated into both Amharic and Sidamu Afo languages and back-translated  
2 to check for consistency [Supplementary file 3]. Subsequently, an electronic data collection  
3 template was prepared using the KoBoToolbox tool, and data collection was made using the  
4 KoBoCollect app for android devices.  
5  
6  
7

### 8 9 **Data collection**

10 Data were collected by trained nurses and midwives who were fluent speakers of both Amharic  
11 and Sidamu Afo languages, recruited from Hawassa University Comprehensive Specialized  
12 Hospital. Data collectors received detailed three-day training on the purpose of the study,  
13 contents of the questionnaire and effective and ethical survey administration. The questionnaire  
14 was pre-tested on 15 women who delivered in Hawassa University Comprehensive Specialized  
15 Hospital which resulted in minor modifications to the questionnaire. Before conducting the post-  
16 intervention survey, data collectors received a one-day refresher training. To ensure data  
17 quality, the supervisor reviewed completed questionnaires for key contents before they were  
18 uploaded from the tablets to the server; the principal investigator cross-checked all uploaded  
19 questionnaires for consistency and completeness.  
20  
21  
22  
23  
24  
25  
26  
27  
28  
29  
30  
31

### 32 33 **Data management and analysis**

34 Data were exported to SPSS V.24 software for cleaning and later to StataSE v.15 software for  
35 analysis. The outcome variable, number of mistreatment components women experienced, was  
36 confirmed to follow the Poisson distribution by using a one sample independent Kolmogorov-  
37 Smirnov test ( $p = 0.97$ ). Additionally, the mean (4.40) and variance (4.14) of the outcome  
38 variable were found to be close and thus suitable for Poisson modelling. Three models were  
39 constructed in this study: a null (intercept-only) model with the intercept as a fixed effect and  
40 random effects for hospitals (model I); a model containing the intervention as a fixed effect and  
41 random effects for hospitals (model II); and a model containing the intervention,  
42 sociodemographic, obstetric, and health service-related factors as fixed effects and random  
43 effects for hospitals (model III). The independent variables were checked for multicollinearity  
44 using the variance inflation factor (VIF). Hospital was set as a random-effects variable in all  
45  
46  
47  
48  
49  
50  
51  
52  
53  
54  
55  
56  
57  
58  
59  
60

1 models to take into account the likely absence of independence among women who received  
2 care from the same hospital. Analysis results from model III are reported in this study. A  
3  
4 multilevel mixed effects Poisson regression analysis was conducted to identify the association  
5  
6 between the independent and outcome variables while adjusting for possible confounders. The  
7  
8 fixed effects (association measures) and random effects (variation measures) for the number of  
9  
10 mistreatment components experienced are reported. Adjusted exponentiated regression  
11  
12 coefficients ( $\beta$ ) with their corresponding 95% confidence intervals (CI) were used to estimate the  
13  
14 level of association between independent variables and the outcome variable. For comparison  
15  
16 purpose, we also ran a fixed effects model with robust standard errors which included hospitals  
17  
18 along with other variables of model III as fixed effects.  
19  
20  
21

### 22 **Patient involvement**

23  
24 Women who gave birth in the study hospitals during the survey periods were involved in the  
25  
26 study. These women were not involved in research design, tool development, data analysis, and  
27  
28 reporting.  
29  
30  
31

### 32 **Results**

#### 33 **Demographics**

34  
35 Among the 388 women who participated in the study (198 pre-intervention, 190 post-  
36  
37 intervention), there was no difference in the distribution of place of residence, age, age at first  
38  
39 marriage, educational level, marital status, religion and ethnicity between the two groups (Table  
40  
41 2). Illiteracy and having a regular monthly income were higher in the post-intervention group.  
42  
43 More than two thirds (70.1%) of women in the post-intervention group were housewives  
44  
45 compared to 51% in the pre-intervention group,  $p < .001$  (Table 2).  
46  
47  
48  
49

#### 50 **Obstetric characteristics**

51  
52 More than half of the participants in the pre-intervention (55.6%) and post-intervention (51.6%)  
53  
54 groups were multiparous (Table 3). The majority of women delivered their previous child at a  
55  
56  
57  
58  
59  
60

1 health institution, 75.2% in the pre-intervention and 70.1% in the post-intervention group.  
2  
3 Comparable levels of women in both groups had antenatal visits during their index pregnancy;  
4  
5 however, having three or more antenatal visits was higher among women in the pre-intervention  
6  
7 survey (82.4% vs 71.2%;  $p=.04$ ). Complications during the index pregnancy were reported by  
8  
9 17.2% of women in the pre-intervention group and 10% in the post-intervention group ( $p=.04$ ).  
10  
11 Compared to women in the pre-intervention group, women in the post-intervention group were  
12  
13 less likely to have had a vaginal delivery (77.4% vs 87.9%,  $p=.01$ ) or an intervened vaginal  
14  
15 delivery (39.5% vs 46.4%,  $p=.15$ ) (Table 3).  
16  
17

### 18 **Service characteristics**

19  
20 There was no difference between the pre- and post-intervention groups with respect to referral  
21  
22 status and time of admission (Table 3). On the other hand, a higher proportion (52.5%) of  
23  
24 women in the pre-intervention group delivered during the night-time than their counterparts  
25  
26 (42.6%),  $p=.05$ . More than three-fifths (61.1%) of women in the pre-intervention group were  
27  
28 assisted mainly by female service providers (51.6% in post-intervention group,  $p=.06$ ) (Table 3).  
29  
30

### 31 **Preference during childbirth**

32  
33 There were 86 (43.7%) women in the pre-intervention group who wanted to have a birth  
34  
35 companion in the labour ward, while the proportion was only 17.9% in the post-intervention  
36  
37 group ( $p<.001$ ). Among those women who wanted to have a birth companion in the pre-  
38  
39 intervention group, 14% were afraid to ask service providers to have one (23.5% in the post-  
40  
41 intervention group). A higher proportion of women in the pre-intervention group wanted to adopt  
42  
43 a preferred birthing position (34.9% vs 19.1%,  $p<.001$ ) and cultural practice in the labour ward  
44  
45 (21.7% vs 8.9%,  $p=.001$ ). Additionally, more than half (51.2%) of women who wanted to have  
46  
47 cultural practice in the pre-intervention group were afraid to ask service providers to have the  
48  
49 practice (47.1% in the post-intervention group). The proportion of women who wanted to move  
50  
51 around during birth and who wanted to have food or fluids during birth did not vary significantly  
52  
53 between the two groups (Table 3).  
54  
55  
56  
57  
58  
59  
60

## Experiences of mistreatment

Almost all women (99.5% pre-intervention vs 99% post-intervention group) reported experiencing at least one type of mistreatment. The number of mistreatment types experienced ranged from one to 12 in the pre-intervention group (median = 5), and one to 11 in the post-intervention group (median = 3.5).

When the pre-intervention and post-intervention groups are compared, a number of improvements are evident. Vaginal examination was performed without permission for 47.9% of the women in post-intervention group; 64.7% in pre-intervention group ( $p=.001$ ) (Table 1).

Additionally, seeking women's consent before procedures, and the practice of allowing birth companions improved post-intervention. On the other hand, some aspects of mistreatment such as the use of harsh or rude language against women, gagging women, and leaving women for a prolonged period of time without attention did not improve significantly following the staff training. Additionally, more than two-thirds (67.9%) of women in the post-intervention group claimed that service providers did not give periodic updates on their labour (52.5% in the pre-intervention survey;  $p=.002$ ) (Table 1).

We also compared the proportion of women who had encountered mistreatment grouped by six categories (verbal abuse; physical abuse; non-consented care; lack of information, privacy and confidentiality; neglect and discrimination; and refusal of preference). Women who reported having experienced at least one type of mistreatment in a given category were regarded as mistreated in that category. The level of non-consented care measured after the intervention (65.3%) is lower than before the intervention (83.3%),  $p<.001$  (Table 1). Similarly, experiences of physical abuse and refusal of preference showed improvement after the intervention. No significant difference was detected in the level of the remaining three categories of mistreatment (Table 1).

## Factors associated with the number of mistreatment components experienced



1 In the bivariate analysis, the number of mistreatment components experienced was higher  
2 among women who had a complication during the index delivery ( $C\beta = 1.16$ , 95%CI: 1.05-1.30)  
3 and an intervention for vaginal delivery ( $C\beta = 1.31$ , 95%CI: 1.20-1.44) (Table 4). Women who  
4 gave birth in Yirgalem hospital also experienced a higher number of mistreatment components  
5 ( $C\beta = 1.36$ , 95%CI: 1.22-1.51) compared to those who gave birth in Adare hospital. In contrast,  
6 the number of mistreatment components experienced was lower among women who had two or  
7 more deliveries and women who had a caesarean delivery (Table 4).  
8  
9  
10  
11  
12  
13  
14  
15

### 16 **Multilevel analysis of changes in reported components of mistreatment**

17  
18 Outputs of the intercept-only model (model I) showed that there was significant variation  
19 between hospitals in the number of components of mistreatment experienced by women (Table  
20 4). The intraclass correlation coefficient (ICC) of model I also revealed that 12.3% of the  
21 variation in the number of components of mistreatment experienced by women is attributable to  
22 differences across hospitals. Model II, a model with the main independent variable (intervention  
23 group), was different and fit as compared to model I ( $p$  for likelihood ratio (LR) test < 0.001).  
24 Furthermore, model III (a model that includes all the independent variables and the intervention  
25 group) was different and fit as compared to model II ( $p$  for LR test < 0.001). The ICC of model III  
26 shows a lower variation (9%) between the hospitals than models I and II. Model III displays the  
27 changes in the number of components of mistreatment experienced by participants of the two  
28 groups (pre-intervention and post-intervention) after adjusting for potential confounders.  
29  
30  
31  
32  
33  
34  
35  
36  
37  
38  
39  
40  
41

42 As displayed in Table 4, the number of components of mistreatment experienced by women in  
43 the post-intervention group is lower by 18% than those in the pre-intervention group; adjusted  
44 regression coefficient ( $A\beta = 0.82$ , 95%CI: 0.74-0.91). The fixed effects model with hospitals as  
45 predictors yielded the same effect size with a narrower CI ( $A\beta = 0.82$ , 95%CI: 0.76-0.89).  
46  
47  
48  
49  
50

51 The number of components of mistreatment experienced by women was higher among women  
52 with complications during pregnancy ( $A\beta = 1.17$ , 95%CI: 1.01-1.34) or delivery ( $A\beta = 1.16$ ,  
53 95%CI: 1.03-1.32). Women who delivered by caesarean section after trial of vaginal delivery  
54  
55  
56  
57  
58  
59  
60

( $A\beta = 0.76$ , 95%CI: 0.63-0.92) and by caesarean section without trial of vaginal delivery ( $A\beta = 0.68$ , 95%CI: 0.47-0.98) experienced fewer number of mistreatment components. The number of mistreatment components experienced by women did not significantly vary by women's demographic, service-related, or other obstetric characteristics not already mentioned above (Table 4).

## Discussion

This study was conducted as part of a mixed methods implementation research that aims to identify health system barriers to respectful maternity care and to propose and test mitigation approaches. To our knowledge, this study is the first to report on the effectiveness of a respectful maternity care intervention (facility-level) in Ethiopia. The study found that the number of mistreatment components experienced by women after the respectful maternity care intervention was reduced by 18% compared to the number experienced by women before the intervention. This is a notable improvement given the small-scale intervention we implemented and the known limitations of interventions focused primarily on training health workers.<sup>47</sup> Training of service providers alone cannot be a solution to address mistreatment unless other system elements that significantly influence the behaviour of service providers are also addressed.

Similar implementation studies have been conducted in response to the growing attention to mistreatment and the need to identify recommendations to eliminate mistreatment. The *Heshima* study (Kenya)<sup>39</sup> and the *Staha* study (Tanzania)<sup>41</sup> were conducted to assess the impact of respectful maternity care interventions on the level of mistreatment. The *Heshima* study involved a multi-component respectful maternity care intervention (policy, facility, and community level); 7% reduction in the prevalence of mistreatment was reported following the intervention.<sup>39</sup> The *Staha* study involved community level (client service charter) and facility-level (quality improvement inventory and intervention in maternity wards) interventions, and reported a 66% reduction in the odds of women reporting mistreatment after the intervention.<sup>41</sup> Both *Heshima* and *Staha* studies used a prevalence measure of mistreatment; women who

1 faced at least one form of mistreatment were labelled as mistreated. Considering women who  
2 encountered at least one form of mistreatment as mistreated in these studies may have resulted  
3 in the underestimation of the magnitude of change.  
4  
5

6  
7 In this study, the proportion of women who experienced non-consented care, physical abuse,  
8 and refusal of preference was significantly lower in the post-intervention group. No significant  
9 difference was observed in the proportion of women who experienced mistreatment in the  
10 remaining three categories of mistreatment (verbal abuse; lack of information, privacy and  
11 confidentiality; and neglect and discrimination). The very high proportion of women who  
12 reported 'non-consented care' suggests that the issue of obtaining consent is not well  
13 understood by the staff (and probably by the hospital administration also). Similarly, the very  
14 high proportion of women who reported 'lack of information, privacy and confidentiality' and  
15 'refusal of preferences' suggests a poor understanding of these concepts and rights among  
16 providers. These are areas that need to be integrated and foregrounded into professional  
17 development/quality improvement programs for all levels of staff and the pre-service training of  
18 health professionals. Additionally, the high level of mistreatment among women who had  
19 complications during delivery, and assisted vaginal delivery might be explained by the fact that  
20 several cadres attend women during such events.  
21  
22  
23  
24  
25  
26  
27  
28  
29  
30  
31  
32  
33  
34  
35  
36  
37

38 According to the *Health Workers for Change* study conducted in four African countries,  
39 structural issues such as shortage/lack of manpower and supplies, and poor working conditions  
40 inhibit implementation of change interventions.<sup>48</sup> According to the Bowser and Hill framework<sup>49</sup>,  
41 structural constraints not only impede change initiatives, they also independently contribute to  
42 mistreatment. Thus, the categories of mistreatment that were likely to have been a product of  
43 these structural issues were not influenced by the intervention because it lacked a structural  
44 dimension.  
45  
46  
47  
48  
49  
50  
51  
52

53 The fact that there is no private labour room combined with the increased presence of birth  
54 companions after the intervention may explain the relative lack of improvement in women's  
55  
56  
57  
58  
59  
60

1 privacy. Adequate preparation and adaptation of labour wards is recommended before  
2 operationalizing birth companionship in resource-limited contexts.<sup>34, 50</sup> Lunze and colleagues  
3 reviewed 259 (83 sub-Saharan Africa based) studies and reports of innovative approaches for  
4 improving maternal and newborn health, using the lens of WHO's health system building blocks.  
5 The review revealed that interventions in one health system building block affected other  
6 building blocks; the review recommends a system-wide intervention to maximize the  
7 effectiveness and sustainability of interventions.<sup>51</sup> Similarly, WHO also recommends that  
8 respectful maternity care should be viewed through the lens of systems thinking when  
9 prioritizing action areas to improve quality of care.<sup>36</sup>

10  
11  
12  
13  
14  
15  
16  
17  
18  
19  
20 What makes the *Staha* study similar to our study is that, no changes in the level of verbal abuse  
21 and neglect and discrimination were observed after the intervention.<sup>41</sup> This might be explained  
22 by the fact that ingrained negative and normalized behaviours require time to change and are  
23 highly associated with age and experience of service providers, younger and less experienced  
24 providers being less supportive during labour.<sup>52</sup> On the contrary, if a proactive focus on  
25 respectful care is provided during pre-service training to younger graduates, who are usually  
26 motivated for change, it may nurture respectful behaviour.<sup>53</sup> Additionally, other factors such as  
27 uncomfortable working circumstances, overcrowded facilities, space constraints, and poorly  
28 motivated staff are not only barriers to the implementation of new guidelines<sup>54</sup> but also  
29 contributors to mistreatment.<sup>49</sup> These factors may have contributed to the steady level of the  
30 mistreatment components that did not improve in the current study.

31  
32  
33  
34  
35  
36  
37  
38  
39  
40  
41  
42  
43  
44 Evidence suggests that women's chosen birth companionship contributes to positive birth  
45 outcomes for both the mother and the newborn<sup>55</sup> and is recommended by the WHO.<sup>34</sup> In this  
46 study, among 120 women who wanted to have a birth companion, only 18(15%) were allowed to  
47 have their chosen companion (11.6% in pre-intervention vs 23.5% in post-intervention group).  
48 Additionally, 16.7% (14% in pre-intervention vs 23.5% in post-intervention group) of those who  
49 would have wanted to have a companion were afraid to ask service providers about this. These  
50 unexpressed preferences highlight that facilities and service providers should promote  
51  
52  
53  
54  
55  
56  
57

1 companionship rather than wait for the request to come from women.<sup>34, 55</sup> And this should be  
2 supported by political commitment, high-level advocacy, and operating guidelines.<sup>56</sup> The  
3 proportion of women who reported to have their preference during childbirth in the post-  
4 intervention survey was lower than that of pre-intervention survey participants; this may be due  
5 to the high proportion of women who had a caesarean birth in the post-intervention survey.  
6

7  
8  
9  
10  
11 In this study, comparing the number (counts) of mistreatment components women experienced  
12 helped to identify the changes in the extent or diversity of mistreatment that would not have  
13 been possible to identify by simple prevalence measures. Additionally, treating hospitals as  
14 random-effects in the statistical model controls for the impact of other interventions that may  
15 have happened around the same time in those facilities. The absence of difference in  
16 demographic and obstetric characteristics between women of the two groups (pre-intervention  
17 and post-intervention) also adds to the soundness of the statistical analysis used to detect  
18 changes in mistreatment. Additionally, where women are admitted in a shared ward, comparing  
19 the proportion of women mistreated rather than comparing the counts of mistreatment fails to  
20 detect changes that might have resulted after an intervention. This is because, there are  
21 components of mistreatment that cannot be totally prevented without major structural changes,  
22 for example, provision of adequate space to ensure privacy and confidentiality.<sup>40</sup>  
23  
24  
25  
26  
27  
28  
29  
30  
31  
32  
33  
34  
35  
36  
37

38 One of the limitations of this study is that the mistreatment components experienced by women  
39 repeatedly were counted only once as binary response options (yes/no) questions were used.  
40 This approach fails to capture multiple incidents of mistreatment components experienced by  
41 women, for example, how many times a woman was verbally abused. Additionally, it might have  
42 also led to the underestimation of the intervention effect size. To overcome such problems,  
43 using questions with frequency response options is recommended. A survey of women at their  
44 exit, as in this study, is prone to recall bias in acquiring data on multiple incidents; instead,  
45 independent observation in the labour room would be more appropriate.<sup>57</sup> However, observation  
46 also has inherent limitations, e.g. the Hawthorne effect—service providers modify their  
47 behaviour and become less disrespectful because they know they are being observed.  
48  
49  
50  
51  
52  
53  
54  
55  
56  
57  
58  
59  
60

1 Pertaining to the generalizability of findings, because the study was conducted only in three  
2 hospitals located in the SNNPR, the findings may not be generalizable to other types of  
3 hospitals, health centres, and clinics that provide childbirth services in Ethiopia. Additionally, the  
4 short washout period and the lack of a control group in this study is a key limitation as it is not  
5 possible to attribute with certainty the changes observed to the respectful maternity care  
6 intervention.  
7  
8  
9  
10  
11  
12

13  
14 Finally, we believe that this study being the first to test the effectiveness of a respectful  
15 maternity care intervention in Ethiopia, contributes to evidence for further endeavours to  
16 improve respectful maternity care specifically, and the quality of childbirth services generally.  
17 Thorough implementation studies that are designed to capture macro and micro level  
18 contributors to mistreatment need to be conducted to inform evidence-driven actions to  
19 eliminate mistreatment during facility-based childbirth in Ethiopia.  
20  
21  
22  
23  
24  
25  
26

## 27 **Conclusions**

28  
29 This study revealed that the childbirth services women received in the study hospitals were  
30 characterized by a wide range of mistreatment behaviours and/or health facility conditions. The  
31 respectful maternity care intervention tested in this study was accompanied by a reduction in  
32 women's experience of mistreatment during facility-based childbirth. Given the variety of factors  
33 that lead to mistreatment in health facilities, interventions designed to mitigate mistreatment  
34 need to be multidimensional—including demand-side (community level), supply-side (health  
35 system level), and policy-level interventions. We believe that this study adds to existing  
36 knowledge on innovations that can be used to mitigate mistreatment. Further research is  
37 needed to investigate the impact and sustainability of health system-level interventions on  
38 women's experiences of mistreatment during facility-based childbirth.  
39  
40  
41  
42  
43  
44  
45  
46  
47  
48  
49  
50

## 51 **Acknowledgements**

52  
53 We would like to pass our heartfelt thanks to experts at the Federal Ministry of Health, the  
54 SNNPR Health Bureau, and Hawassa University College of Medicine and Health Sciences who  
55  
56  
57  
58  
59  
60

1 reviewed the respectful maternity care training manual and coordinated the training sessions.  
2  
3 We also extend our appreciation to all participants of the study, service providers, and facility  
4  
5 administrations for being an active player in the smooth operation of the study. Members of the  
6  
7 data collection team also deserve a warm appreciation for their engagement.  
8  
9

### 10 **Contributors**

11 AA conceived the study; AA, AM and MK designed the study, developed data collection tools;  
12  
13 AA trained data collectors, coordinated the fieldwork; AA, SA, HM, ET and SG conducted the  
14  
15 intervention; AA, AM and MK analysed the data; AA, AM and MK drafted the manuscript; SA,  
16  
17 HM, ET and SG revised the manuscript for intellectual content. All authors have read and  
18  
19 approved the manuscript.  
20  
21  
22

### 23 **Funding**

24  
25 The training of service providers was made possible by support from the Institute of Healthcare  
26  
27 Improvement (IHI) through the Federal Ministry of Health, Ethiopia. The primary author of this  
28  
29 study is the recipient of the Melbourne Research Scholarship (University of Melbourne), and the  
30  
31 Population Health Investing in Research Students' Training (PHIRST) travel grant (Melbourne  
32  
33 School of Population and Global Health, University of Melbourne). The contents of this research  
34  
35 article only reflect the authors' opinions but do not show interest/s of either of the organizations  
36  
37 involved in the funding.  
38  
39

### 40 **Competing interests**

41  
42 The authors declare that they have no competing interests  
43  
44

### 45 **Ethics approval**

46  
47 Ethics approval was obtained from the Institutional Review Board (Ethics ID: 3-12/12926)  
48  
49 located in SNNPR Health Bureau, Ethiopia and the Human Ethics Sub-Committee (Ethics ID:  
50  
51 HESC 1750054) at the University of Melbourne, Australia. Permission letter to conduct this  
52  
53 study was also granted from the Federal Ministry of Health and SNNPR Health Bureau. A  
54  
55 printout of information about the study (plain language statement) prepared in local languages  
56  
57  
58  
59  
60

was given to literate study participants, and their written consent was recorded on a separate consent form. For illiterate participants, data collectors read contents of both the plain language statement script and the consent form, sought their verbal consent, and signed the consent form on their behalf in the presence of a witness. All forms used were approved by the ethics committees.

## Data sharing statement

Reasonable requests can be made to access study data from the corresponding author.

**Word count: 5746**

## References

1. World Health Organization. Trends in maternal mortality: 2000 to 2017: Estimates by WHO, UNICEF, UNFPA, World Bank Group and the United Nations Population Division. Geneva, Switzerland: World Health Organization; 2019.
2. Alvarez JL, Gil R, Hernandez V, Gil A. Factors associated with maternal mortality in Sub-Saharan Africa: an ecological study. *BMC public health*. 2009;9:462.
3. Every Woman Every Child. The global strategy for women's, children's and adolescents' health (2016-2030). *Every Woman Every Child*; 2015.
4. Ethiopian Public Health Institute (EPHI) [Ethiopia] and ICF. Ethiopia Mini Demographic and Health Survey 2019: Key Indicators. Rockville, Maryland, USA: EPHI and ICF; 2019.
5. Hailu D, Berhe H. Determinants of institutional childbirth service utilisation among women of childbearing age in urban and rural areas of Tsegedie district, Ethiopia. *Midwifery*. 2014;30(11):1109-17.
6. Roro MA, Hassen EM, Lemma AM, Gebreyesus SH, Afework MF. Why do women not deliver in health facilities: a qualitative study of the community perspectives in south central Ethiopia? *BMC Res Notes*. 2014;7:556.
7. Sipsma H, Thompson J, Maurer L, Bradley E, Curry L. Preferences for home delivery in Ethiopia: provider perspectives. *Glob Public Health*. 2013;8(9):1014-26.
8. Tarekegn SM, Lieberman LS, Giedraitis V. Determinants of maternal health service utilization in Ethiopia: analysis of the 2011 Ethiopian Demographic and Health Survey. *BMC pregnancy and childbirth*. 2014;14:161.
9. Mirkuzie AH. Exploring inequities in skilled care at birth among migrant population in a metropolitan city Addis Ababa, Ethiopia; a qualitative study. *Int J Equity Health*. 2014;13:110.
10. Jackson R, Tesfay FH, Godefay H, Gebrehiwot TG. Health Extension Workers' and Mothers' Attitudes to Maternal Health Service Utilization and Acceptance in Adwa Woreda, Tigray Region, Ethiopia. *PLoS One*. 2016;11(3):e0150747.
11. Wassihun B, Zeleke S. Compassionate and respectful maternity care during facility based child birth and women's intent to use maternity service in Bahir Dar, Ethiopia. *BMC pregnancy and childbirth*. 2018;18(1):294.
12. King R, Jackson R, Dietsch E, Hailemariam A. Barriers and facilitators to accessing skilled birth attendants in Afar region, Ethiopia. *Midwifery*. 2015;31(5):540-6.
13. Bohren MA, Hunter EC, Munthe-Kaas HM, Souza JP, Vogel JP, Gulmezoglu AM. Facilitators and barriers to facility-based delivery in low- and middle-income countries: a qualitative evidence synthesis. *Reproductive health*. 2014;11(1):71.
14. Tappis H, Koblinsky M, Doocy S, Warren N, Peters DH. Bypassing Primary Care Facilities for Childbirth: Findings from a Multilevel Analysis of Skilled Birth Attendance Determinants in Afghanistan. *J Midwifery Womens Health*. 2016;61(2):185-95.



- 1 15. Otis KE, Brett JA. Barriers to hospital births: why do many Bolivian women give birth at home? *Revista Pana-mericana de Salud Publica*. 2008;24(1):46-53.
- 2 16. Crissman HP, Engmann CE, Adanu RM, Nimako D, Crespo K, Moyer CA. Shifting norms: pregnant  
3 women's perspectives on skilled birth attendance and facility-based delivery in rural Ghana. *Afr J*  
4 *Reprod Health*. 2013;17(1):15-26.
- 5 17. Dahlberg M, Södergård B, Thorson A, Alfvén T, Awiti-Ujiji O. Being perceived as 'a real woman' or  
6 following one's own convictions: a qualitative study to understand individual, family, and community  
7 influences on the place of childbirth in Busia, Kenya. *Culture, Health & Sexuality*. 2015;17(3):326-  
8 42.
- 9 18. Kwambai TK, Dellicour S, Desai M, Ameh CA, Person B, Achieng F, et al. Perspectives of men on  
10 antenatal and delivery care service utilisation in rural western Kenya: a qualitative study. *BMC*  
11 *pregnancy and childbirth*. 2013;13:134.
- 12 19. Kujawski S, Mbaruku G, Freedman LP, Ramsey K, Moyo W, Kruk ME. Association Between  
13 Disrespect and Abuse During Childbirth and Women's Confidence in Health Facilities in Tanzania.  
14 *Matern Child Health J*. 2015;19(10):2243-50.
- 15 20. Seljeskog L, Sundby J, Chimango J. Factors influencing women's choice of place of delivery in  
16 rural Malawi--an explorative study. *Afr J Reprod Health*. 2006;10(3):66-75.
- 17 21. Bruce SG, Blanchard AK, Gurav K, Roy A, Jayanna K, Mohan HL, et al. Preferences for infant  
18 delivery site among pregnant women and new mothers in Northern Karnataka, India. *BMC*  
19 *pregnancy and childbirth*. 2015;15:49.
- 20 22. Sando D, Abuya T, Asefa A, Banks KP, Freedman LP, Kujawski S, et al. Methods used in  
21 prevalence studies of disrespect and abuse during facility based childbirth: lessons learned.  
22 *Reproductive health*. 2017;14(1):127.
- 23 23. Bohren MA, Vogel JP, Hunter EC, Lutsiv O, Makh SK, Souza JP, et al. The Mistreatment of  
24 Women during Childbirth in Health Facilities Globally: A Mixed-Methods Systematic Review. *PLoS*  
25 *medicine*. 2015;12(6):e1001847; discussion e.
- 26 24. Banks KP, Karim AM, Ratcliffe HL, Betemariam W, Langer A. Jeopardizing quality at the frontline of  
27 healthcare: prevalence and risk factors for disrespect and abuse during facility-based childbirth in  
28 Ethiopia. *Health Policy Plan*. 2018;33(3):317-27.
- 29 25. Gebremichael MW, Worku A, Medhanyie AA, Berhane Y. Mothers' experience of disrespect and  
30 abuse during maternity care in northern Ethiopia. *Glob Health Action*. 2018;11(sup3):1465215.
- 31 26. Asefa A, Bekele D. Status of respectful and non-abusive care during facility-based childbirth in a  
32 hospital and health centers in Addis Ababa, Ethiopia. *Reproductive health*. 2015;12:33.
- 33 27. Asefa A, Bekele D, Morgan A, Kermode M. Service providers' experiences of disrespectful and  
34 abusive behavior towards women during facility based childbirth in Addis Ababa, Ethiopia.  
35 *Reproductive health*. 2018;15(1):4.
- 36 28. Sheferaw ED, Bazant E, Gibson H, Fenta HB, Ayalew F, Belay TB, et al. Respectful maternity care  
37 in Ethiopian public health facilities. *Reprod Health*. 2017;14(1):60.
- 38 29. World Health Organization. The prevention and elimination of disrespect and abuse during facility-  
39 based childbirth. World Health Organization; 2014.
- 40 30. Vogel JP, Bohren MA, Tuncalp O, Oladapo OT, Adanu RM, Balde MD, et al. How women are  
41 treated during facility-based childbirth: development and validation of measurement tools in four  
42 countries - phase 1 formative research study protocol. *Reproductive health*. 2015;12:60.
- 43 31. Rubashkin N, Warnock R, Diamond-Smith N. A systematic review of person-centered care  
44 interventions to improve quality of facility-based delivery. *Reproductive health*. 2018;15(1):169.
- 45 32. Nilvér H, Begley C, Berg M. Measuring women's childbirth experiences: a systematic review for  
46 identification and analysis of validated instruments. *BMC pregnancy and childbirth*. 2017;17(1):203.
- 47 33. White Ribbon Alliance. Respectful maternity care: the universal rights of childbearing women.  
48 Washington (District of Columbia): White Ribbon Alliance; 2011.
- 49 34. World Health Organization. WHO recommendations: Intrapartum care for a positive childbirth  
50 experience. World Health Organization; 2018.
- 51 35. World Health Organization. Strategies toward ending preventable maternal mortality (EPMM).  
52 World Health Organization; 2015.
- 53 36. World Health Organization. Standards for improving quality of maternal and newborn care in health  
54 facilities. World Health Organization; 2016.
- 55 37. Bohren MA, Mehrtash H, Fawole B, Maung TM, Balde MD, Maya E, et al. How women are treated  
56 during facility-based childbirth in four countries: a cross-sectional study with labour observations  
57 and community-based surveys. *Lancet*. 2019.

- 1 38. The Federal Democratic Republic of Ethiopia Ministry of Health. Health Sector Transformation  
2 Plan: 2015/16 - 2019/20. Addis Ababa, Ethiopia: Federal Ministry of Health; 2015.
- 3 39. Abuya T, Ndwiga C, Ritter J, Kanya L, Bellows B, Binkin N, et al. The effect of a multi-component  
4 intervention on disrespect and abuse during childbirth in Kenya. *BMC pregnancy and childbirth*.  
5 2015;15(1):224.
- 6 40. Ratcliffe HL, Sando D, Lyatuu GW, Emil F, Mwanyika-Sando M, Chalamilla G, et al. Mitigating  
7 disrespect and abuse during childbirth in Tanzania: an exploratory study of the effects of two  
8 facility-based interventions in a large public hospital. *Reproductive health*. 2016;13(1):79.
- 9 41. Kujawski SA, Freedman LP, Ramsey K, Mbaruku G, Mbuyita S, Moyo W, et al. Community and  
10 health system intervention to reduce disrespect and abuse during childbirth in Tanga Region,  
11 Tanzania: A comparative before-and-after study. *PLoS medicine*. 2017;14(7):e1002341.
- 12 42. Charity N, Warren C, Abuya T, Kanya L, AliceMaranga, Ochieng C, et al. Promoting respectful  
13 maternity care a training guide for facility-based workshops. New York: Population Council; 2015.
- 14 43. Maternal and Child Health Integrated Program. Respectful maternity care workshop: Learning  
15 resource package. Maternal and Child Health Integrated Program; 2013.
- 16 44. White Ribbon Alliance. Respectful Maternity Care: A Nigeria Focused Health Workers' Training  
17 Guide. Washington, DC: Futures Group, Health Policy Project; 2015.
- 18 45. United Nations. Universal Declaration of Human Rights: United Nations; 1948 [Available from:  
19 <http://www.un.org/en/universal-declaration-human-rights/>].
- 20 46. United Nations General Assembly. Technical guidance on the application of a human rightsbased  
21 approach to the implementation of policies and programmes to reduce preventable maternal  
22 morbidity and mortality. United Nations; 2012.
- 23 47. Chang YS, Coxon K, Portela AG, Furuta M, Bick D. Interventions to support effective  
24 communication between maternity care staff and women in labour: A mixed-methods systematic  
25 review. *Midwifery*. 2018;59:4-16.
- 26 48. Fonn S, Mtonga AS, Nkoloma HC, Bantebya Kyomuhendo G, daSilva L, Kazilimani E, et al. Health  
27 providers' opinions on provider-client relations: results of a multi-country study to test Health  
28 Workers for Change. *Health Policy Plan*. 2001;16 Suppl 1:19-23.
- 29 49. Bowser D, Hill K. Exploring Evidence for Disrespect and Abuse in Facility-Based Childbirth-A  
30 landscape analysis of the global situation of abuse and disrespect in maternity care. USAID,  
31 Traction Project; 2010.
- 32 50. Miller S, Abalos E, Chamillard M, Ciapponi A, Colaci D, Comande D, et al. Beyond too little, too late  
33 and too much, too soon: a pathway towards evidence-based, respectful maternity care worldwide.  
34 *Lancet*. 2016.
- 35 51. Lunze K, Higgins-Steele A, Simen-Kapeu A, Vesel L, Kim J, Dickson K. Innovative approaches for  
36 improving maternal and newborn health--A landscape analysis. *BMC pregnancy and childbirth*.  
37 2015;15:337.
- 38 52. Barrett SJ, Stark MA. Factors associated with labor support behaviors of nurses. *J Perinat Educ*.  
39 2010;19(1):12-8.
- 40 53. Dynes MM, Twentymen E, Kelly L, Maro G, Msuya AA, Dominico S, et al. Patient and provider  
41 determinants for receipt of three dimensions of respectful maternity care in Kigoma Region,  
42 Tanzania-April-July, 2016. *Reprod Health*. 2018;15(1):41.
- 43 54. Spallek H, Song M, Polk DE, Bekhuis T, Frantsve-Hawley J, Aravamudhan K. Barriers to  
44 implementing evidence-based clinical guidelines: a survey of early adopters. *J Evid Based Dent  
45 Pract*. 2010;10(4):195-206.
- 46 55. Hodnett ED, Gates S, Hofmeyr GJ, Sakala C. Continuous support for women during childbirth.  
47 *Cochrane Database of Systematic Reviews*. 2013(7).
- 48 56. Sharma G, Mathai M, Dickson KE, Weeks A, Hofmeyr G, Lavender T, et al. Quality care during  
49 labour and birth: a multi-country analysis of health system bottlenecks and potential solutions. *BMC  
50 pregnancy and childbirth*. 2015;15 Suppl 2:S2.
- 51 57. Bohren MA, Vogel JP, Fawole B, Maya ET, Maung TM, Balde MD, et al. Methodological  
52 development of tools to measure how women are treated during facility-based childbirth in four  
53 countries: labor observation and community survey. *BMC Med Res Methodol*. 2018;18(1):132.

**Table 1 Women's experience of mistreatment during childbirth**

| <b>Types of mistreatment experienced</b>                                                                          | <b>Pre-intervention<br/>n (%)</b> | <b>Post-intervention<br/>n (%)</b> | <b>p-value<br/>for <math>\chi^2</math></b> |
|-------------------------------------------------------------------------------------------------------------------|-----------------------------------|------------------------------------|--------------------------------------------|
| <b>Verbal abuse</b>                                                                                               | 17 (8.6)                          | 11 (5.8)                           | 0.29                                       |
| Health workers used harsh or rude language                                                                        | 8 (4.0)                           | 6 (3.2)                            | 0.64                                       |
| Health workers made judgmental or accusatory comments about woman                                                 | 8 (4.1)                           | 2 (1.1)                            | 0.06                                       |
| Health workers made threats of withholding treatment                                                              | 1 (0.5)                           | 2 (1.1)                            | 0.54                                       |
| Health workers blamed woman for any features of birth outcome                                                     | 4 (2.0)                           | 4 (2.1)                            | 0.95                                       |
| <b>Physical abuse</b>                                                                                             | 33 (16.7)                         | 17 (8.9)                           | 0.02*                                      |
| Woman was beaten, slapped, kicked, or pinched                                                                     | 7 (3.5)                           | 5 (2.6)                            | 0.61                                       |
| Woman was gagged                                                                                                  | 19 (9.6)                          | 11 (5.8)                           | 0.16                                       |
| Woman was restrained                                                                                              | 19 (9.6)                          | 9 (4.74)                           | 0.06                                       |
| <b>Non-consented care</b>                                                                                         | 165 (83.3)                        | 124 (65.3)                         | <0.001*                                    |
| Health workers did not obtain consent for procedure/s                                                             | 138 (69.7)                        | 84 (44.2)                          | <0.001*                                    |
| Health workers ever separated woman from her baby without explaining                                              | 14 (7.1)                          | 7 (3.7)                            | 0.14                                       |
| Health workers did not ask woman's permission before conducting vaginal examination                               | 128 (64.7)                        | 91 (47.9)                          | 0.001*                                     |
| Health workers did not ask woman's permission before performing surgery (episiotomy or caesarean section) (n=220) | 69 (65.1)                         | 44 (38.6)                          | <0.001*                                    |
| Health workers made woman stay in the hospital against her will                                                   | 4 (2.0)                           | 2 (1.1)                            | 0.44                                       |
| <b>Lack of information, privacy and confidentiality</b>                                                           | 189 (95.5)                        | 182 (95.8)                         | 0.88                                       |
| Health workers did not keep woman's information confidential                                                      | 18 (9.1)                          | 7 (3.7)                            | 0.03*                                      |
| Health workers conducted vaginal examination without maintaining woman's privacy                                  | 162 (81.8)                        | 147 (77.4)                         | 0.28                                       |
| Health workers did not give periodic updates on woman's labour                                                    | 104 (52.5)                        | 129 (67.9)                         | 0.002*                                     |
| Health workers spoke to woman in a language she could not understand                                              | 5 (2.5)                           | 9 (4.7)                            | 0.24                                       |
| <b>Neglect and discrimination</b>                                                                                 | 24 (12.1)                         | 17 (8.9)                           | 0.31                                       |
| Health workers did not always come following woman's call                                                         | 8 (4.0)                           | 7 (3.7)                            | 0.86                                       |
| Woman was ever left for a prolonged period of time without attention                                              | 19 (9.6)                          | 12 (6.3)                           | 0.23                                       |
| Health worker was not present for the actual birth of woman's baby                                                | 5 (2.5)                           | 3 (1.6)                            | 0.51                                       |
| Health workers discriminated woman based on her attribute                                                         | -                                 | 2 (1.1)                            | -                                          |
| <b>Refusal of preference</b>                                                                                      | 134 (67.7)                        | 104 (54.7)                         | 0.01*                                      |
| Health workers did not allow woman to have a birth companion present                                              | 64 (86.5)                         | 18 (69.2)                          | 0.04*                                      |
| Health workers did not allow woman to move around during labour                                                   | 43 (76.7)                         | 63 (94.3)                          | 0.002*                                     |
| Health workers did not allow woman to have foods or fluids                                                        | 66 (94.3)                         | 62 (98.4)                          | 0.21                                       |
| Health workers did not allow woman to deliver in her preferred position                                           | 43 (66.2)                         | 12 (33.3)                          | 0.001*                                     |
| Health workers did not allow woman to have cultural practice in labour                                            | 16 (76.2)                         | 0 (-)                              | -                                          |

Table 2 Women's sociodemographic characteristics

| Variables                                 |                      | Pre-intervention<br>n (%) | Post-intervention<br>n (%) | p-value<br>for $\chi^2$ |
|-------------------------------------------|----------------------|---------------------------|----------------------------|-------------------------|
| Place of residence                        | Urban                | 125 (63.1)                | 119 (62.6)                 | 0.92                    |
|                                           | Rural                | 73 (36.9)                 | 71 (37.4)                  |                         |
| Age in completed year                     | 15-24                | 98 (49.5)                 | 96 (50.5)                  | 0.93                    |
|                                           | 25-34                | 89 (45.0)                 | 85 (44.8)                  |                         |
|                                           | 35-44                | 11 (5.5)                  | 9 (4.7)                    |                         |
|                                           | Median (IQR)         | 25 (7)                    | 24 (8)                     |                         |
| Age at first pregnancy                    | Median (IQR)         | 20 (4)                    | 20 (4)                     | 0.72                    |
| Educational level                         | No formal education  | 29 (14.7)                 | 38 (20.0)                  | 0.13                    |
|                                           | Primary education    | 81 (40.9)                 | 74 (39.0)                  |                         |
|                                           | Secondary education  | 48 (24.2)                 | 54 (28.4)                  |                         |
|                                           | College and above    | 40 (20.2)                 | 24 (12.6)                  |                         |
| Marital status                            | Single               | 2 (1.0)                   | 1 (0.5)                    | 0.86                    |
|                                           | Married              | 195 (98.5)                | 188 (99.0)                 |                         |
|                                           | Separated            | 1 (0.5)                   | 1 (0.5)                    |                         |
| Religion                                  | Christian Protestant | 140 (70.7)                | 141 (74.2)                 | 0.29                    |
|                                           | Christian Orthodox   | 27 (13.6)                 | 27 (14.2)                  |                         |
|                                           | Christian Catholic   | 7 (3.5)                   | 2 (1.0)                    |                         |
|                                           | Muslim               | 17 (8.6)                  | 10 (5.3)                   |                         |
|                                           | Others               | 7 (3.6)                   | 10 (5.3)                   |                         |
| Ethnicity                                 | Sidama               | 139 (70.2)                | 128 (67.4)                 | 0.20                    |
|                                           | Oromo                | 7 (3.5)                   | 15 (7.9)                   |                         |
|                                           | Amhara               | 13 (6.6)                  | 17 (9.0)                   |                         |
|                                           | Wolayita             | 17 (8.6)                  | 17 (9.0)                   |                         |
|                                           | Others               | 22 (11.)                  | 13 (6.8)                   |                         |
| Occupation                                | Housewife            | 101 (51.0)                | 134 (70.5)                 | < 0.001                 |
|                                           | Private employee     | 8 (4.0)                   | 8 (4.21)                   |                         |
|                                           | Government employee  | 36 (18.2)                 | 29 (15.3)                  |                         |
|                                           | Private business     | 41 (20.7)                 | 13 (6.8)                   |                         |
|                                           | Others               | 12 (6.1)                  | 6 (3.2)                    |                         |
| Respondent has regular<br>monthly income* | Yes                  | 89 (45.0)                 | 69 (36.3)                  | 0.08                    |
|                                           | < 1552 Br            | 34 (38.2)                 | 25 (36.2)                  | 0.8                     |
|                                           | ≥ 1552 Br            | 55 (61.8)                 | 44 (63.8)                  |                         |
|                                           | Median (IQR)         | 2000 (2015)               | 2000 (1900)                |                         |
|                                           | No                   | 109 (55.0)                | 121 (63.7)                 |                         |

\*1USD = 27.23 Br (Average between March and August 2018)

**Table 3 Women's obstetric and maternal healthcare characteristics and preferences during childbirth**

| Variables                                               |                                             | Pre-intervention<br>n (%) | Post-intervention<br>n (%) | p-value<br>for $\chi^2$ |      |
|---------------------------------------------------------|---------------------------------------------|---------------------------|----------------------------|-------------------------|------|
| Total number of deliveries                              | One                                         | 88 (44.4)                 | 92 (48.4)                  | 0.43                    |      |
|                                                         | Two or more                                 | 110 (55.6)                | 98 (51.6)                  |                         |      |
|                                                         | Median (IQR)                                | 2 (1)                     | 2 (2)                      |                         |      |
| Place of delivery of previous child (n=206)             | Health facility                             | 82 (75.2)                 | 68 (70.1)                  | 0.41                    |      |
|                                                         | Outside health facility                     | 27 (24.8)                 | 29 (29.9)                  |                         |      |
| Number of previous facility-based deliveries            | None                                        | 22 (20.2)                 | 22 (22.5)                  |                         |      |
|                                                         | One                                         | 69 (63.3)                 | 53 (54.0)                  |                         |      |
|                                                         | Two and more                                | 18 (16.5)                 | 23 (23.5)                  |                         |      |
| Antenatal visit during index pregnancy                  | Median (IQR)                                | 1 (0)                     | 1 (0)                      | 0.35                    |      |
|                                                         | Yes                                         | 188 (94.9)                | 184 (96.8)                 |                         |      |
|                                                         | One                                         | 5 (2.7)                   | 9 (4.9)                    |                         | 0.04 |
|                                                         | Two                                         | 28 (14.9)                 | 44 (23.9)                  |                         |      |
| Experienced complication during index pregnancy         | Three or more                               | 155 (82.4)                | 131 (71.2)                 |                         |      |
|                                                         | No                                          | 10 (5.1)                  | 6 (3.2)                    |                         |      |
|                                                         | Yes                                         | 34 (17.2)                 | 19 (10.0)                  |                         |      |
| Experienced complication during index delivery          | No                                          | 164 (82.8)                | 171 (90.0)                 | 0.56                    |      |
|                                                         | Yes                                         | 67 (34.0)                 | 70 (36.8)                  |                         |      |
| Referral status on admission                            | No                                          | 130 (66.0)                | 120 (63.2)                 | 0.39                    |      |
|                                                         | Referred                                    | 81 (40.9)                 | 86 (45.3)                  |                         |      |
| Time of admission*                                      | Non-referred                                | 117 (59.1)                | 104 (54.4)                 | 0.78                    |      |
|                                                         | Day time                                    | 106 (53.5)                | 99 (52.1)                  |                         |      |
| Time of delivery*                                       | Night-time                                  | 92 (46.5)                 | 91 (47.9)                  | 0.05                    |      |
|                                                         | Day time                                    | 94 (47.5)                 | 109 (57.4)                 |                         |      |
| Type of delivery                                        | Night-time                                  | 104 (52.5)                | 81 (42.6)                  | 0.01                    |      |
|                                                         | Vaginal delivery                            | 174 (87.9)                | 147 (77.4)                 |                         |      |
|                                                         | Caesarean after trial of vaginal delivery   | 18 (9.1)                  | 38 (20.0)                  |                         |      |
| Had intervention/s for vaginal delivery (n=377)**       | Caesarean without trial of vaginal delivery | 6 (3.0)                   | 5 (2.6)                    | 0.15                    |      |
|                                                         | Yes                                         | 89 (46.4)                 | 73 (39.5)                  |                         |      |
| Types of assisted vaginal delivery (n=162) <sup>§</sup> | No                                          | 101 (53.6)                | 111 (60.5)                 | 0.83                    |      |
|                                                         | Vacuum extraction                           | 12 (13.5)                 | 9 (12.3)                   |                         |      |
|                                                         | Forceps delivery                            | 8 (9.0)                   | 2 (2.7)                    |                         |      |
| Gender of main service provider                         | Episiotomy                                  | 82 (92.1)                 | 71 (97.3)                  | 0.16                    |      |
|                                                         | Female                                      | 121 (61.1)                | 98 (51.6)                  |                         |      |
| Woman wanted to have birth companion in the labour ward | Male                                        | 77 (38.9)                 | 92 (48.4)                  | 0.06                    |      |
|                                                         | Yes                                         | 86 (43.7)                 | 34 (17.9)                  |                         |      |
| Woman wanted to move around during birth                | No                                          | 111 (56.5)                | 156 (82.1)                 | <0.001                  |      |
|                                                         | Yes                                         | 57 (28.8)                 | 67 (35.5)                  |                         |      |
| Woman wanted to have food or fluids during birth        | No                                          | 141 (71.1)                | 122 (64.5)                 | 0.16                    |      |
|                                                         | Yes                                         | 70 (35.4)                 | 63 (33.2)                  |                         |      |
|                                                         | No                                          | 128 (64.6)                | 127 (66.8)                 | 0.65                    |      |

|   |                                |     |            |            |        |
|---|--------------------------------|-----|------------|------------|--------|
| 1 | Woman had a preferred birthing | Yes | 69 (34.9)  | 36 (19.1)  | <0.001 |
| 2 | position                       | No  | 129 (65.1) | 153 (80.9) |        |
| 3 | Woman wanted to have cultural  | Yes | 43 (21.7)  | 17 (8.9)   | 0.001  |
| 4 | practice in labour             | No  | 155 (78.3) | 173 (91.1) |        |

---

5 *\*Stayed in hospital for at least two hours between 8pm and 8am immediately before childbirth*

6 *\*\*Includes: Episiotomy, vacuum extractor or forceps*

7 *§a woman can have more than one procedure*

8  
9  
10  
11  
12  
13  
14  
15  
16  
17  
18  
19  
20  
21  
22  
23  
24  
25  
26  
27  
28  
29  
30  
31  
32  
33  
34  
35  
36  
37  
38  
39  
40  
41  
42  
43  
44  
45  
46  
47  
48  
49  
50  
51  
52  
53  
54  
55  
56  
57  
58  
59  
60

For peer review only

**Table 4 Multilevel mixed-effects regression of counts of mistreatment experienced by women**

| Variables                                              | Bivariate model<br>CB (95% CI) | Model I<br>Aβ (95% CI) | Model II<br>Aβ (95% CI)   | Model III<br>Aβ (95% CI)  |
|--------------------------------------------------------|--------------------------------|------------------------|---------------------------|---------------------------|
| <b>A) Fixed effects</b>                                |                                |                        |                           |                           |
| (Intercept)                                            |                                | 4.32 (3.60, 5.12)      | <b>4.82 (3.98, 5.84)*</b> | 7.18 (3.34, 15.44)        |
| <b>Intervention group</b>                              |                                |                        |                           |                           |
| Pre-intervention                                       | Ref.                           |                        | Ref.                      | Ref.                      |
| Post-intervention                                      | 0.79 (0.72, 0.87)              |                        | <b>0.79 (0.72, 0.87)*</b> | <b>0.82 (0.74, 0.91)*</b> |
| <b>Place of residence</b>                              |                                |                        |                           |                           |
| Urban                                                  | Ref.                           |                        |                           | Ref.                      |
| Rural                                                  | 1.11 (1.00, 1.22)              |                        |                           | 1.05 (0.93, 1.19)         |
| <b>Age in completed year</b>                           |                                |                        |                           |                           |
| 15-24                                                  | Ref.                           |                        |                           | Ref.                      |
| 25-34                                                  | <b>0.85 (0.77, 0.94)*</b>      |                        |                           | 0.95 (0.82, 1.09)         |
| 35-44                                                  | <b>0.74 (0.58, 0.94)*</b>      |                        |                           | 0.81 (0.61, 1.08)         |
| <b>Age at first pregnancy</b>                          | <b>1.03 (1.01, 1.04)*</b>      |                        |                           | 1.01 (0.99, 1.03)         |
| <b>Marital status</b>                                  |                                |                        |                           |                           |
| Single                                                 | Ref.                           |                        |                           | Ref.                      |
| Married                                                | 0.77 (0.48, 1.25)              |                        |                           | 0.79 (0.45, 1.39)         |
| Separated                                              | 1.24 (0.61, 2.51)              |                        |                           | 1.06 (0.49, 2.31)         |
| <b>Religion</b>                                        |                                |                        |                           |                           |
| Christian Protestant                                   | Ref.                           |                        |                           | Ref.                      |
| Christian Orthodox                                     | 0.91 (0.78, 1.04)              |                        |                           | 0.93 (0.76, 1.12)         |
| Christian Catholic                                     | 1.01 (0.74, 1.38)              |                        |                           | 1.01 (0.73, 1.40)         |
| Muslim                                                 | 1.04 (0.87, 1.25)              |                        |                           | 1.07 (0.88, 1.31)         |
| Others                                                 | <b>0.70 (0.54, 0.93)*</b>      |                        |                           | 0.80 (0.60, 1.07)         |
| <b>Ethnicity</b>                                       |                                |                        |                           |                           |
| Sidama                                                 | Ref.                           |                        |                           | Ref.                      |
| Oromo                                                  | 0.90 (0.73, 1.12)              |                        |                           | 0.93 (0.72, 1.19)         |
| Amhara                                                 | 0.87 (0.72, 1.05)              |                        |                           | 0.98 (0.77, 1.25)         |
| Wolayita                                               | 0.96 (0.81, 1.14)              |                        |                           | 1.13 (0.92, 1.40)         |
| Others                                                 | 1.02 (0.86, 1.20)              |                        |                           | 1.00 (0.81, 1.24)         |
| <b>Educational level</b>                               |                                |                        |                           |                           |
| No formal education                                    | Ref.                           |                        |                           | Ref.                      |
| Primary education                                      | 1.11 (0.96, 1.27)              |                        |                           | 0.99 (0.84, 1.15)         |
| Secondary education                                    | 1.05 (0.90, 1.22)              |                        |                           | 0.98 (0.81, 1.18)         |
| College and above                                      | 1.18 (1.00, 1.39)              |                        |                           | 1.07 (0.84, 1.38)         |
| <b>Occupation</b>                                      |                                |                        |                           |                           |
| Housewife                                              | Ref.                           |                        |                           | Ref.                      |
| Private employee                                       | 1.06 (0.84, 1.35)              |                        |                           | 1.06 (0.77, 1.47)         |
| Government employee                                    | 1.01 (0.89, 1.16)              |                        |                           | 0.95 (0.72, 1.25)         |
| Private business                                       | 1.00 (0.87, 1.16)              |                        |                           | 1.01 (0.80, 1.27)         |
| Others                                                 | 1.14 (0.91, 1.41)              |                        |                           | 0.90 (0.69, 1.16)         |
| <b>Has regular monthly income*</b>                     |                                |                        |                           |                           |
| No                                                     | Ref.                           |                        |                           | Ref.                      |
| Yes                                                    | 0.95 (0.86, 1.04)              |                        |                           | 0.92 (0.75, 1.13)         |
| <b>Total number of deliveries</b>                      |                                |                        |                           |                           |
| One                                                    | Ref.                           |                        |                           | Ref.                      |
| Two or more                                            | <b>0.76 (0.69, 0.84)*</b>      |                        |                           | 0.86 (0.74, 1.02)         |
| <b>Antenatal visit during index pregnancy</b>          |                                |                        |                           |                           |
| No                                                     | Ref.                           |                        |                           | Ref.                      |
| Yes                                                    | 0.82 (0.66, 1.02)              |                        |                           | 0.95 (0.74, 1.22)         |
| <b>Experienced complication during index pregnancy</b> |                                |                        |                           |                           |
| No                                                     | Ref.                           |                        |                           | Ref.                      |
| Yes                                                    | <b>1.35 (1.19, 1.53)*</b>      |                        |                           | <b>1.17 (1.01, 1.34)</b>  |
| <b>Experienced complication during index delivery</b>  |                                |                        |                           |                           |

|    |                                              |                           |                    |                           |
|----|----------------------------------------------|---------------------------|--------------------|---------------------------|
| 1  | No                                           | Ref.                      |                    | Ref.                      |
| 2  | Yes                                          | <b>1.16 (1.05, 1.30)*</b> |                    | <b>1.16 (1.03, 1.32)*</b> |
| 3  | <b>Referral status on admission</b>          |                           |                    |                           |
| 4  | Referred                                     | Ref.                      |                    | Ref.                      |
| 5  | Non-referred                                 | 0.93 (0.85, 1.02)         |                    | 1.07 (0.94, 1.21)         |
| 6  | <b>Total hours of stay</b>                   | 1.00 (0.99, 1.00)         |                    | 1.00 (0.99, 1.00)         |
| 7  | <b>Gender of main service provider</b>       |                           |                    |                           |
| 8  | Female                                       | Ref.                      |                    | Ref.                      |
| 9  | Male                                         | 1.05 (0.95, 1.16)         |                    | 1.03 (0.93, 1.16)         |
| 10 | <b>Type of delivery</b>                      |                           |                    |                           |
| 11 | Vaginal delivery                             | Ref.                      |                    | Ref.                      |
| 12 | Caesarean after trial of vaginal delivery    | <b>0.78 (0.67, 0.90)*</b> |                    | <b>0.76 (0.63, 0.92)*</b> |
| 13 | Caesarean without trial of vaginal delivery  | <b>0.67 (0.48, 0.95)*</b> |                    | <b>0.68 (0.47, 0.98)*</b> |
| 14 | <b>Had intervention for vaginal delivery</b> |                           |                    |                           |
| 15 | No                                           | Ref.                      |                    | Ref.                      |
| 16 | Yes                                          | <b>1.31 (1.20, 1.44)*</b> |                    | 1.04 (0.91, 1.19)         |
| 17 | <b>B) Random effects</b>                     |                           |                    |                           |
| 18 | Hospital Variance                            | 0.02 (0.01-0.14)*         | 0.03 (0.001-0.14)* | -                         |
| 19 | ICC (%)                                      | 12.3                      | 13.6               | 9.0                       |
| 20 | <b>C) Model fitness</b>                      |                           |                    |                           |
| 21 | AIC                                          | 1600                      | 1577               | 1570                      |
| 22 | Log Likelihood                               | -798                      | -786               | -750                      |
| 23 | P value                                      | -                         | < 0.001            | < 0.001                   |

• Significant at  $p < .05$

Abbreviations:  $\beta$  exponentiated regression coefficient,  $C\beta$  crude exponentiated regression coefficient,  $A\beta$  adjusted exponentiated regression coefficient, CI confidence interval, ICC Intraclass correlation, AIC Akaike's information criterion



## Supplementary file 1

## Facility-led respectful maternity care assessment checklist for continuous quality improvement

| RMC standards                                    | Measurement criteria                                         |                                                                                                                                  | NA | Remark |
|--------------------------------------------------|--------------------------------------------------------------|----------------------------------------------------------------------------------------------------------------------------------|----|--------|
|                                                  | <b>O: observation; I: interview; RD: review of documents</b> |                                                                                                                                  |    |        |
| The woman is protected from verbal abuse         | <input type="checkbox"/>                                     | 1. Uses polite language, avoids use of harsh or rude language <b>(O)</b>                                                         |    |        |
|                                                  | <input type="checkbox"/>                                     | 2. Does not make judgmental or accusatory comments <b>(O)</b>                                                                    |    |        |
|                                                  | <input type="checkbox"/>                                     | 3. Does not make threats to withhold treatment <b>(O)</b>                                                                        |    |        |
|                                                  | <input type="checkbox"/>                                     | 4. Does not blame a woman for any feature of her birth outcome/s <b>(O)</b>                                                      |    |        |
| Score                                            | of ____                                                      |                                                                                                                                  |    |        |
| The woman is protected from physical abuse       | <input type="checkbox"/>                                     | 1. Does not beat, slap, kick, or pinch a woman <b>(O)</b>                                                                        |    |        |
|                                                  | <input type="checkbox"/>                                     | 2. Does not deny a woman to cry or scream during labor <b>(O)</b>                                                                |    |        |
|                                                  | <input type="checkbox"/>                                     | 3. Does not restrain (tie) a woman <b>(O)</b>                                                                                    |    |        |
| Score                                            | of ____                                                      |                                                                                                                                  |    |        |
| The woman is not stigmatized or discriminated    | <input type="checkbox"/>                                     | 1. Serves a woman respectfully regardless of her religion/race/ethnicity/age/socioeconomic status/medical condition <b>(O/I)</b> |    |        |
|                                                  | <input type="checkbox"/>                                     | 2. Serves a woman respectfully regardless of her medical condition <b>(O/I)</b>                                                  |    |        |
| Score                                            | of ____                                                      |                                                                                                                                  |    |        |
| The woman received professional standard of care | <input type="checkbox"/>                                     | 1. Seeks for woman's consent prior to performing any procedure <b>(O)</b>                                                        |    |        |
|                                                  | <input type="checkbox"/>                                     | 2. Never shouts loudly when communicating woman's information to other staff <b>(O/I)</b>                                        |    |        |
|                                                  | <input type="checkbox"/>                                     | 3. Keeps woman's personal information secure <b>(O/I/RD)</b>                                                                     |    |        |
|                                                  | <input type="checkbox"/>                                     | 4. Performs vaginal examination very gently to minimize pain <b>(O/I)</b>                                                        |    |        |
|                                                  | <input type="checkbox"/>                                     | 5. Maintains woman's privacy while performing vaginal examination <b>(O/I)</b>                                                   |    |        |
|                                                  | <input type="checkbox"/>                                     | 6. Gives a woman pain relief when she needs it <b>(O/I)</b>                                                                      |    |        |
|                                                  | <input type="checkbox"/>                                     | 7. Obtains woman's consent before preparing her for surgery <b>(O/I)</b>                                                         |    |        |
|                                                  | <input type="checkbox"/>                                     | 8. Responds to a woman immediately following her call <b>(O/I)</b>                                                               |    |        |
|                                                  | <input type="checkbox"/>                                     | 9. Never leaves a woman alone during labour <b>(O/I)</b>                                                                         |    |        |
| Score                                            | of ____                                                      |                                                                                                                                  |    |        |
|                                                  | <input type="checkbox"/>                                     | 1. Introduces himself/herself to a woman when he/she first meet her <b>(I/O)</b>                                                 |    |        |

1  
2  
3  
4  
5  
6  
7  
8  
9  
10  
11  
12  
13  
14  
15  
16  
17  
18  
19  
20  
21  
22  
23  
24  
25  
26  
27  
28  
29  
30  
31  
32  
33  
34  
35  
36  
37  
38  
39  
40  
41  
42  
43  
44  
45  
46  
47

|                                                                      |                          |                                                                                                      |  |  |
|----------------------------------------------------------------------|--------------------------|------------------------------------------------------------------------------------------------------|--|--|
| The woman received care with good provider rapport and communication | <input type="checkbox"/> | 2. Serves a woman in a polite manner <b>(I/O)</b>                                                    |  |  |
|                                                                      | <input type="checkbox"/> | 3. Does not ignore woman's concern/s while she is in labor <b>(I/O)</b>                              |  |  |
|                                                                      | <input type="checkbox"/> | 4. Speaks to a woman in a clear language <b>(I/O)</b>                                                |  |  |
|                                                                      | <input type="checkbox"/> | 5. Gives a woman periodic updates of progress of labor <b>(O/I)</b>                                  |  |  |
|                                                                      | <input type="checkbox"/> | 6. Gives credit to every effort a woman makes in labor <b>(O/I)</b>                                  |  |  |
|                                                                      | <input type="checkbox"/> | 7. Allows a woman to move around during labor unless there is an indication to deny her <b>(O/I)</b> |  |  |
|                                                                      | <input type="checkbox"/> | 8. Allows a woman to take food or fluids if there is no other indication to deny her <b>(I/O)</b>    |  |  |
|                                                                      | <input type="checkbox"/> | 9. Allows woman's birth companions for companionship <b>(I/O)</b>                                    |  |  |
|                                                                      | <input type="checkbox"/> | 10. Allows a woman to assume position of her choice during labor <b>(I/O)</b>                        |  |  |
|                                                                      | <input type="checkbox"/> | 11. Allows a woman any cultural practice she wants to practice in labor <b>(I/O)</b>                 |  |  |
|                                                                      | <input type="checkbox"/> | 12. Does not objectify a woman in labor <b>(I/O)</b>                                                 |  |  |
|                                                                      | <input type="checkbox"/> | 13. Does not make a woman stay in the hospital without her will <b>(I/O)</b>                         |  |  |
|                                                                      | <input type="checkbox"/> | 14. Keeps a baby with his mom unless there is another indication <b>(O/I)</b>                        |  |  |
|                                                                      | Score                    | ___ of ___                                                                                           |  |  |
| Grand score                                                          | ___ of ___               |                                                                                                      |  |  |

NA: Not applicable



Supplementary file 2: Order of studies and timing of data collection

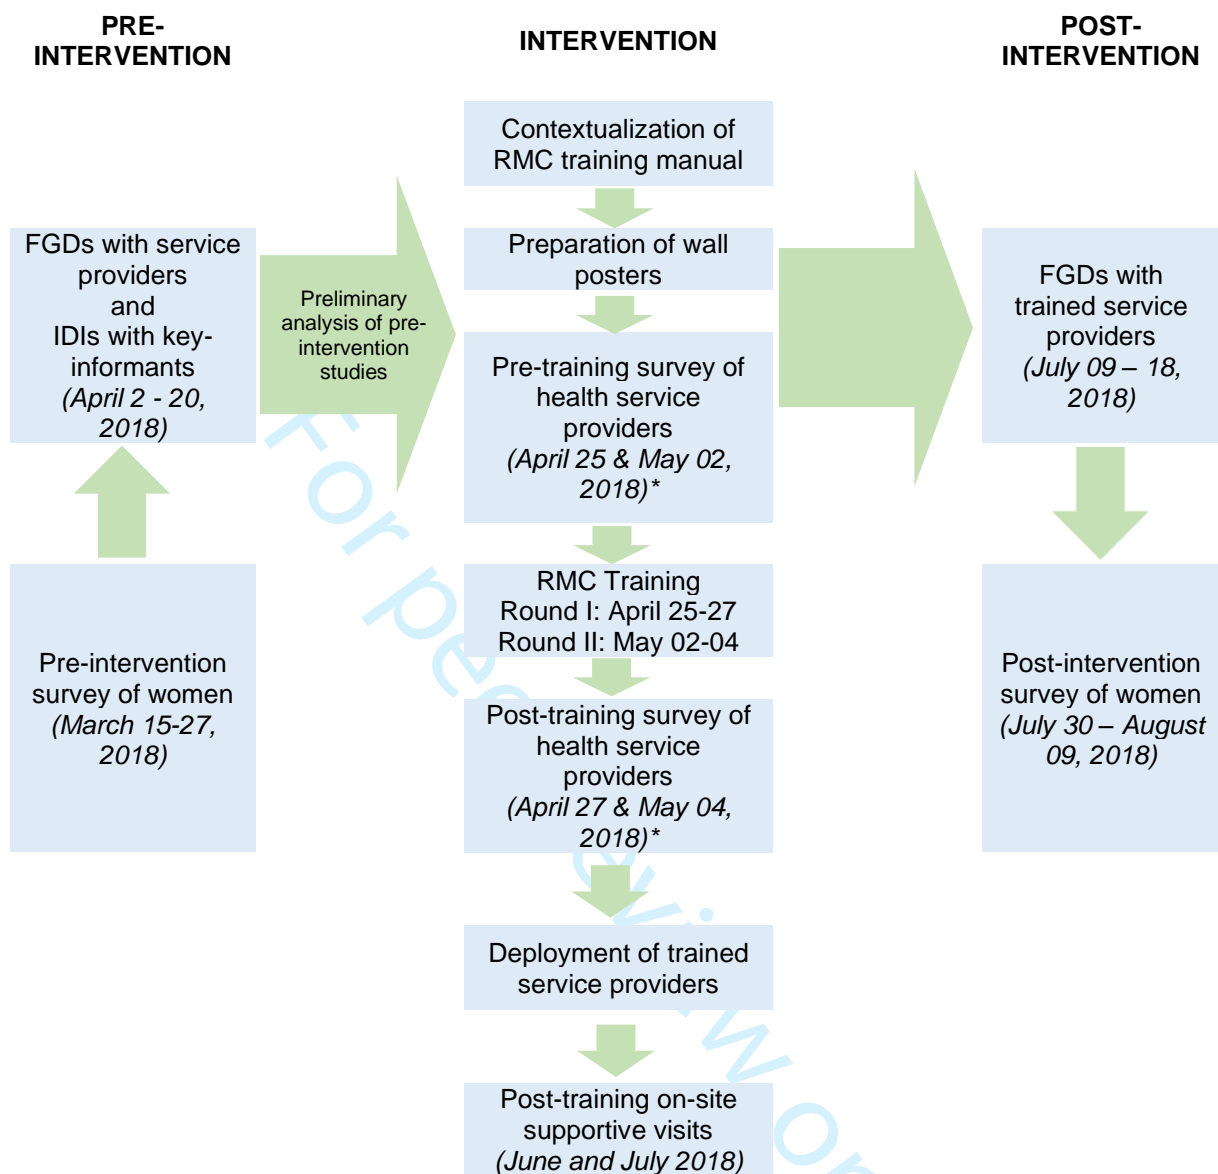

RMC-respectful maternity care

\*RMC training was conducted in two rounds from 25-27 April 2018 and 02-04 May 2018.

The post intervention FGDs and the post-intervention survey of women providers were conducted after the intervention has been completed

# RMC women's survey

Dear data collector, please read the plain language summary and seek for participants consent before proceeding to the survey

## Did the woman agree to participate?

Yes

No

## Name of data collector

Helen

Lemlem

Maereg

## Interview code (three digits)

---

## Hospital

Adare

Leku

Yirgalem

## 101. Place of residence

Urban Kebele

Rural kebele

## 102. Age in completed years

---

## 103. Age at first pregnancy (in years)

---

## 104. Marital status

Single

Married

Separated

Divorced

Widowed

**105. Religion**

- Protestant, christian
- Orthodox, christian
- Muslim
- Christian Catholic
- Others

**106. Ethnicity**

- Sidama
- Amhara
- Oromo
- Wolayita
- Others

**107. Educational status**

- No formal education
- Some primary - did not complete grade 8
- Completed grade 8
- Some secondary - did not complete grade 12
- Completed grade 12
- More than secondary

**108. Occupation**

- Housewife
- Farmer
- Private employee
- Government employee
- Private business
- Others

**109. How many children do you have?****110. Do you have regular household monthly income?**

- Yes
- No

**111. Estimated monthly income (in birr)**

1 **201. How many times have you delivered before? (including current one)**

2 \_\_\_\_\_

3

4

5 **202. Where did you deliver your last (previous) child?**

- 6  Health facility
- 7  Home
- 8  Traditional birth attendant's home
- 9  On my way to health facility
- 10
- 11
- 12
- 13
- 14

15 **203. How many times have you delivered in health facility? (excluding current one)?**

16 \_\_\_\_\_

17

18

19

20 **204. Did you have antenatal care visit during your current pregnancy?**

- 21  Yes
- 22  No
- 23
- 24
- 25

26 **205. How many antenatal care visits did you have?**

- 27  One
- 28  Two
- 29  Three or more
- 30  Don't remember
- 31
- 32
- 33
- 34
- 35

36 **206. Did you have any complication during your current pregnancy?**

- 37  Yes
- 38  No
- 39  I don't know
- 40
- 41
- 42
- 43

44 **207. Did you have any complication during your current labor and delivery?**

- 45  Yes
- 46  No
- 47
- 48
- 49

50 **301. Were you referred from other facility or directly came here in?**

- 51  Referred
- 52  Non-referred
- 53
- 54
- 55

56 **302. What time did you get admitted to the hospital?**

57 \_\_\_\_\_

58 yyyy-mm-dd

59 \_\_\_\_\_

60 hh:mm

**303. What time did you deliver?**

yyyy-mm-dd

hh:mm

**304. What type of ward were you admitted in?** Private ward Shared ward**305. What was gender of the service provider who mainly assisted you in labor?** Female Male**306. What type of birth did you have?** Vaginal birth Caesarean birth after labour trial Caesarean birth without labour trial**307. Did you have any procedure for an assisted delivery?** Yes No**308. Which procedure did you receive? (Multiple responses possible)** Vacuum Forceps Episiotomy**401. Did the health workers use harsh or rude language?** Yes No**402. Did the health workers make judgmental or accusatory comments about you?** Yes No**403. Were you beaten, slapped, kicked, or pinched during childbirth?** Yes No**404. Were you gagged during childbirth?** Yes No



1 **405. Were you physically restrained during childbirth?**

2  Yes

3  No

4  
5  
6 **406. Did the health workers make threats of withholding treatment?**

7  Yes

8  No

9  
10  
11  
12 **407. Did the health workers blame you for any feature of your birth outcomes?**

13  Yes

14  No

15  
16  
17  
18 **408. Did the health workers obtain your consent for all procedures?**

19  Yes

20  No

21  
22  
23  
24 **409. Did the health workers keep information about you confidential?**

25  Yes

26  No

27  
28  
29  
30 **410. Did you have any surgical procedure (episiotomy, cesarean section)?**

31  Yes

32  No

33  
34  
35  
36 **411. Did the health worker ask your permission before performing surgery?**

37  Yes

38  No

39  
40  
41  
42 **412. Did the health workers always come following your call?**

43  Yes

44  No

45  
46  
47  
48 **413. Were you ever left for a prolonged period of time without attention during your labour?**

49  Yes

50  No

51  
52  
53  
54 **414. Was a health provider present for the actual birth of your baby?**

55  Yes

56  No

57  
58  
59  
60 **415. Did the health workers ever separate you from your baby without explaining the reason?**

Yes

No

1 **416. Did the health workers ask your permission before conducting a vaginal examination?**

2  Yes

3  No

4  
5  
6 **417. Did any health worker conduct vaginal examination without maintaining your privacy?**

7  Yes

8  No

9  
10  
11  
12 **418. Did the health workers speak to you in a language you do not understand?**

13  Yes

14  No

15  
16  
17  
18 **419. Did the health workers give you periodic updates on your labor?**

19  Yes

20  No

21  
22  
23  
24 **420. Did you want to have a birth companion in the labor ward?**

25  Yes

26  No

27  
28  
29  
30 **421. Did the health workers allow you to have your birth companion present?**

31  Yes

32  No

33  I was afraid to ask

34  
35  
36  
37  
38 **422. Did you want to move around during your labor?**

39  Yes

40  No

41  
42  
43  
44 **423. Did the health workers allow you to move around during your labor?**

45  Yes

46  No

47  
48  
49  
50 **424. Did you want to have food or fluids during your labor?**

51  Yes

52  No

53  
54  
55  
56 **425. Did the health workers allow you to have food or fluids?**

57  Yes

58  No

1 **426. Did you have a preferred birthing position?**

2  Yes

3  No

4  
5  
6 **427. Did the health workers allow you to deliver in your preferred position?**

7  Yes

8  No

9  I was afraid to ask

10  
11  
12 **428. Did you want to have a cultural practice in labor?**

13  Yes

14  No

15  
16  
17 **429. Did the health workers allow you this cultural practice in labor?**

18  Yes

19  No

20  I was afraid to ask

21  
22  
23 **430. Did the health workers make you stay in the hospital against your will?**

24  Yes

25  No

26  
27  
28  
29  
30  
31  
32 **431. Did the health workers discriminate you based on your religion /ethnicity/age/socioeconomic status/medical condition?**

33  Yes

34  No

# RMC women's survey

ከመጀመሪያ በፊት የጥናቱን ዓላማ እዚህ ላይ በተጻፈው በማስረዳት የተሳታፊዎን ፈቃድ ጠይቂ

የጥናቱ ተጋባዥ ለመሳተፍ ፈቃደኛ ናት?

አዎ

አይ

የመረጃ ሰብሳቢ ስም

ሐላፊ

ለምለም

ማዕረግ

የቃለ መጠይቅ ኮድ

የሆስፒታል ስም

ኡዳሬ

ለኩ

ዶ.ር.ጋዳለም

101. የመኖሪያ አድራሻ

የከተማ ቀበሌ

የገጠር ቀበሌ

102. ዕድሜ

103. ለመጀመሪያ ጊዜ ያረገዙት በስንት እድሜዎት ነው?

104. የጋብቻ ሁኔታ

ያላገባች

ያገባች

የተለያዩዎች

የተፋታች

ባል የሞተባት

1 **105. ሃይማኖት**

- 2  ፕሮቴስታንት
- 3
- 4  ኦርቶዶክስ
- 5
- 6  ሙስሊም
- 7
- 8  ካቶሊክ
- 9
- 10  ሌላ

11

12 **106. ብሔር**

- 13  ሲዳማ
- 14
- 15  አማራ
- 16
- 17  ኦሮሞ
- 18
- 19  ወላይታ
- 20
- 21  ሌላ

22

23 **107. የትምህርት ደረጃ**

- 24
- 25  ያልተማረች
- 26
- 27  አንደኛ ደረጃ (1-8)
- 28
- 29  ስምንተኛ ክፍል ያጠናቀቀች
- 30
- 31  ሁለተኛ ደረጃ (9-12)
- 32
- 33  ኢሥራ ሁለተኛ ክፍል ያጠናቀቀች
- 34
- 35  ከኢሥራ ሁለተኛ ክፍል በላይ

36 **108. የሥራ ዓይነት**

- 37
- 38  የቤት አመቤት
- 39
- 40  አርሶ አደር/አርብቶ አደር
- 41
- 42  የግል ተቀጣሪ
- 43
- 44  የመንግስት ተቀጣሪ
- 45
- 46  የግል ንግድ
- 47
- 48  ሌላ

49 **109. ስንት ልጅ አለዎት?**

50

51

52

---

53

54 **110. ቋሚ ወርሃዊ ገቢ አለዎት?**

- 55  አዎ
- 56
- 57  አይ
- 58
- 59

60 **111. አማካይ የወር ገቢ (በብር)**





1 **405. በምጥም ጊዜ እንዳይንቀሳቀሱ ታስረው/ታግደው ነበር?**

2  አዎን

3  አይ

6 **406. ያዋለዱዎት የጤና ባለሙያ ክትትል/ሕክምና አልሰጥዎትም በማለት ዝተው ነበር?**

8  አዎን

9  አይ

12 **407. ያዋለዱዎት የጤና ባለሙያ በወሊድዎ ጊዜ ለተፈጠረው ሁሉ ነገር ወቅሶዎት ነበር?**

14  አዎን

15  አይ

18 **408. ያዋለዱዎት የጤና ባለሙያ ምርመራ ሲያደርጉ የእርስዎን ፈቃድ ይጠይቁ ነበር?**

20  አዎን

21  አይ

24 **409. ያዋለዱዎት የጤና ባለሙያ የእርስዎን የግል መረጃ በሚሰጥር ይይዙ ነበር?**

26  አዎን

27  አይ

30 **410. በዛሬው ወሊድዎ ጊዜ የቀድሞ ጥገና ተደርጎልዎት ነበር? (እስተትች/አፕራሲዮን)**

32  አዎን

33  አይ

36 **411. የጤና ባለሙያው እስተትች/አፕራሲዮን ከመስራታቸው በፊት የእርስዎን ፈቃድ ጠይቀው ነበር?**

38  አዎን

39  አይ

42 **412. ያዋለዱዎት የጤና ባለሙያ እርስዎ እገዛ ፈልገው ሲጠሩ ሁልጊዜ ይመጡ ነበር?**

44  አዎን

45  አይ

48 **413. በወሊድ ጊዜዎ ለረጅም ሰዓት ያለጤና ባለሙያ ክትትል ብቻዎን ተትተው ነበር?**

50  አዎን

51  አይ

54 **414. ልጅዎን በወለዱ ሰዓት የጤና ባለሙያ አጠገብዎ ነበር?**

55  አዎን

56  አይ

59 **415. ያዋለዱዎት የጤና ባለሙያ ምክንያቱን ሳይነግሩዎት ልጅዎን ከእርዎ የተለየ ቦታ አድርገው ነበር?**

አዎን

አይ



1 **416. የዋለዳዎች የጤና ባለሙያ የማህጸን ምርመራ ሲያደርጉልዎት ፈቃድዎን ይጠይቁ ነበር?**

2  አዎን

3  አይ

6 **417. የዋለዳዎች የጤና ባለሙያ ሌሎች ሰዎች እንዳያዩ መከለያ ሳያደርጉ የማህጸን ምርመራ አድርጎልዎት ነበር?**

8  አዎን

9  አይ

12 **418. የዋለዳዎች የጤና ባለሙያ በማይረዱትና በማይገባዎት መልክ ይናገሩ ነበር?**

14  አዎን

15  አይ

18 **419. የዋለዳዎች የጤና ባለሙያ የምጥዎን ሂደት ይነግሩዎት ነበር?**

20  አዎን

21  አይ

24 **420. በወሊድዎ ጊዜ የራስዎ ሰው/ዘመድ (ድጋፍ ሰጪ) አብሮዎት ማዋለጃ ክፍል እንዲሆን ፈልገው ነበር?**

26  አዎን

27  አይ

30 **421. የጤና ባለሙያዎች የራስዎ ሰው/ዘመድ (ድጋፍ ሰጪ) አብሮዎት ማዋለጃ ክፍል እንዲሆን ፈቅደውሎት ነበር?**

32  አዎን

33  አይ

34  መጠየቅ ፈርቼ አልጠየቅኩም

38 **422. በምጥዎ ጊዜ መንቀሳቀስ ፈልገው ነበር?**

39  አዎን

40  አይ

44 **423. የጤና ባለሙያዎች በምጥዎ ጊዜ እንዲንቀሳቀሱ ፈቅደውልዎት ነበር?**

45  አዎን

46  አይ

50 **424. በምጥዎ ጊዜ ፈሳሽ ወይም ደረቅ ምግብ መውሰድ ፈልገው ነበር?**

51  አዎን

52  አይ

56 **425. የጤና ባለሙያዎች በምጥዎ ጊዜ ፈሳሽ ወይም ደረቅ ምግብ እንዲጠቀሙ ፈቅደውልዎት ነበር?**

57  አዎን

58  አይ

60

1 **426. በወሊድዎ ጊዜ እንዲኖርዎት የፈለጉት አቀማመጥ ወይም አተኛኝነት ነበር?**

2  አዎን

3  አይ

6 **427. የጤና ባለሙያዎች በወሊድዎ ጊዜ ለእርዎ በሚመችዎት አቀማመጥ/አተኛኝነት እንዲወልዱ ፈቅደውልዎት ነበር?**

8  አዎን

9  አይ

11  መጠየቅ ፈርቼ አልጠየቅኩም

14 **428. በወሊድዎ ጊዜ ባህላዊ ሥነሥርዓቶችን (ቡና ማፍላት/ገንፎ ማዘጋጀት/ቅቤ መቀባት/ወዘተ) ፈልገው ነበር?**

16  አዎን

17  አይ

20 **429. በወሊድዎ ጊዜ ባህላዊ ሥነሥርዓቶችን (ቡና ማፍላት/ገንፎ ማዘጋጀት/ቅቤ መቀባት/ወዘተ) እንዲያደርጉ ፈቅደውልዎት ነበር?**

22  አዎን

23  አይ

25  መጠየቅ ፈርቼ አልጠየቅኩም

28 **430. ከወሊድዎ በኋላ ያለእርስዎ ፈቃድ በሆስፒታል እንዲቆዩ ተገደው ነበር?**

29  አዎን

30  አይ

34 **431. በወሊድዎ ጊዜ የጤና ባለሙያዎች በዘር/በሃይማኖት/በኢኮኖሚ አቅም/በዕድሜ የተነሳ መገለል አድርሰውቦት ነበር?**

35  አዎን

36  አይ

37  
38  
39  
40  
41  
42  
43  
44  
45  
46  
47  
48  
49  
50  
51  
52  
53  
54  
55  
56  
57  
58  
59  
60

# RMC women's survey

Baxamootta taje gamba assattati, fiqaadensa afi'rate taje gamba assakki albaanni xaphishu hedo eeggatena seekkite xawisse nabbawinsa

## Ama hajo beeqqate sumuu yitino?

Ee

Dee'ni

## Taje gamba asannohu su'ma

Helen

Lemlem

Maereg

## koode

---

## Hospitaale

Adaare

Lekku

Yirgalamete

## 101. Mama hee'ratta?

Katamu Qawalera

Gaxarate Qawalera

## 102. Me'e wo'ma diro ikkannohe?

---

## 103. Umo godowitta woyite me'e diro ikkannohe?

---

## 104. Mine assi'rate gari hiitooti?

Mine diassiroomma

Mine assiroomma

Baxxe hee'remma

Giwame tidhamoomma

Galte'ya reyitno

**105. Amma'na**

- Protestaantete kirstianati
- Ortodokisete kirstianaati
- Islaamaho
- Katolikete kirstiyanati
- Wolehoro kuli\_\_\_\_\_

**106. Daga**

- Sidama
- Amara
- Oromo
- Wolayita
- Wolehoro kuli\_\_\_\_\_

**107. Rosu deerri**

- Dirosoomma
- Umi deerra rose, kayinni 8 digudoma
- 8 gudoomma
- Layink deerra, kayinni 12 digudoomma
- 12 gudoomma
- Layink deer aleenniti

**108. Loosikki maati?**

- Mini amaati
- Baatto loosi're galeemma
- Gillete qaxaramoomma
- Mengistete looso loosema
- Umi'ya daddalo loosema
- Woleretiro kuli

**109. Me'e ooso noohe?****110. Minikkira aganunni egennantino eo noohe?**

- Ee
- Dinoe

**111. Aganunni afi'ratahu me'e ikkanno(birrunni)**

1 **201. Xaahunni ledo xaa geeshsha me'e higge ilootta?**

2  
3  
4 \_\_\_\_\_  
5  
6 **202. Sai qaaqqokki mama ilootta?**

- 7  Fayyimmate uurrinshira  
8  Mine  
9  ilshiishanno amuwi mine  
10  Fayyimate uurrinsha haranni doogote

11  
12  
13  
14  
15 **203. Fayyimmate mine me'e higge ilootta? ( xaa qaaqqo agurranna)**

16  
17  
18 \_\_\_\_\_  
19  
20 **204. Konne/Tenne qaaqqo Godowitta waro fayyimmate mine Godowinni noo amuwira uyinanni owaante/kaa'lo afi'rate**  
21 **ha'rootta**

- 22  
23  Ee  
24  Dee'ni/diha'roomma

25  
26  
27 **205. Owaante afi'rate me'e higge ha'rootta?**

- 28  
29  Mitte hige  
30  Lame hige  
31  Sase hige woyi hakuyi aleenni  
32  Diqaagemma

33  
34  
35  
36  
37 **206. Konne/Tenne qaaqqo godowitta waro lowo fayyimmate qarri ille egenninoheni?**

- 38  Ee  
39  Dee'ni  
40  Diafoomma

41  
42  
43  
44  
45 **207. Konne/Tenne qaaqqo godowitta woyi ilitta woyite lowo qarri ille egenninoheni?**

- 46  Ee  
47  Dee'ni

48  
49  
50  
51 **301. Wole fayyimmate uurrinshanni sonkeennahenso qaxxitahuni dayoota?**

- 52  Sonkeennae dayoomma  
53  Disonkeennae (mininni fulumma gedeenni dayoomma)

54  
55  
56  
57 **302. Tenne hospitaalera goxxe aka'ma mamote hanafootta?**

58  
59 yyy-mm-dd

hh:mm  
60 \_\_\_\_\_

**303. Ma yanna ilootta**

yyyy-mm-dd

hh:mm

**304. Goxxe fulitta kifile hiittoote?** Callu/mittu manchi kifileeti Woluno goxanno kifileeti**305. Ilitta woyite fayyimmate ogeessi meyaatenso labbaaho?** Meyaate Labbaaho**306. Hiittonni ilitta?** Qarru nookkiha illanni widoonni Shiimare wo'naalum mahu gedensaanni darreena iloomma Shiimareno wo'naalum makki darreena iloomma**307. ilate kaa'loro yine wolere loonsiheri nooni?** Ee Dee'ni**308. Hiittee ilate kaa'lo loonsonnihe?** Qaaqqu umo amadatenni kaa'lannorichchinni Qarawu gedeerichchinni kaa'linoonnie Illanni doogo shiimawa daratenni kaa'linoonnie**401. Fayyimmate ogeeyye kaajjado giwisanno qaale horonsdhuheni?** Ee Dee'ni**402. Fayyimmate ogeeyye atere faradate woyi kassasate gedee hedoo assitinoni?** Ee Dee'ni**403. Ilitta woyite ganihehu, qawaadihehu, kadihehu woyi qi'miidihehu nooni?** Ee Dee'ni**404. Ilitta woyite Fugihehunooni?** Ee Dee'ni

1 **405. Ilitta woyite biso milli yaattakki gede hoollonniheni?**

2  Ee

3  Dee'ni

4 **406. Fayyimmate ogeeyye kaa'lo ho'litanni waajjishiishshuheni?**

5  Ee

6  Dee'ni

7 **407. Fayyimmate ogeeyye ileemmahu ma ikkannokka yitanni waajjottahura woqassuheni?**

8  Ee

9  Dee'ni

10 **408. Fayyimmate Ogeeyye loossannohe loosira ate fajjo xa'mitinhohe?**

11  Ee

12  Dee'ni

13 **409. Fayyimmate Ogeeyye atewi affanno Misixire maaxxanno?**

14  Ee

15  Dee'ni

16 **410. Darre loonsonniheni (illanni doogo dara, Godowa darreenna ila)**

17  Ee

18  Dee'ni

19 **411. Fayyimmate ogeeyye godowakki darate albaanni ate fajjo xa'mitino?**

20  Ee

21  Dee'ni

22 **412. Fayyimmate Ogeeyye woshshirita woyite rakke dagganno?**

23  Ee

24  Dee'ni

25 **413. Fayyimmate ogeeyye gamete aana hee'dheenna seeda yannara ate callakki agurte hadhinoheni?**

26  Ee

27  Dee'ni

28 **414. Fayyimmate Ogeeyye qaaqqu ilami yannara mule no?**

29  Ee

30  Dee'ni

31 **415. Fayyimmate ogeeyye atera korkaata kultukkinni qaaqqokki atewiinni baddinoni?**

32  Ee

33  Dee'ni

1 **416. Fayyimmate Ogeeyye illanni doogo mirmara assate albaanni ate fajjo xa'mitinohe?**

2  Ee

3  Dee'ni

4 **417. Aye'e fayyimmate ogeessi illanni doogo mirmara assanno woyite wolu la'annokki gede assikkinni la'annoheni?**

5  Ee

6  Dee'ni

7 **418. Fayyimmate ogeessi ati afoottakki qaalinni coo'rinoheni?**

8  Ee

9  Dee'ni

10 **419. Fayyimmate ogeessi gamete yannara yanna yannante heedhanno lexxo kulannohe?**

11  Ee

12  Dee'ni

13 **420. Ilate gamete goxootta kifilera jaallakki ledokki ikkitara hasi'ratani?**

14  Ee

15  Dee'ni

16 **421. Fayyimmate ogeeyye jaallakki ledokki heedhannota fajjitinnohe?**

17  Ee

18  Dee'ni

19  xa'ma waaje dixam'ooma

20 **422. Gamete yannara goxootta akawaawera milli yaa hasirottankanni?**

21  Ee

22  Dee'ni

23 **423. Fayyimmate ogeeyye milli yaatta gede fajjitinnohe?**

24  Ee

25  Dee'ni

26 **424. Gamete yannara itattara woyi agattara hasi'rattani?**

27  Ee

28  Dee'ni

29 **425. Fayyimmate ogeeyye itattara woyi agattara fajjitinnohe?**

30  Ee

31  Dee'ni



1 **426. Ilatta woyite hedhahera hasirootta ofolla woyi goxa doodhotani?**

2  Ee

3  Dee'ni

4  
5  
6 **427. Fayyimmate ogeessi ati doodhotta bayichcho heedhe ilattara fajjinnohe?**

7  Ee

8  Dee'ni

9  xa'ma waaje dixam'ooma

10  
11  
12  
13  
14 **428. Gamete yannara budunni ilanno meentira assinannire atera assinahera hasi'rittani?**

15  Ee

16  Dee'ni

17  
18  
19  
20 **429. Fayyimmate ogeeyye gamete yannara budunni amuwaho assinannire atera assinahera fajjtinnohe?**

21  Ee

22  Dee'ni

23  xa'ma waaje dixam'ooma

24  
25  
26  
27  
28 **430. Fayyimmate ogeeyye ati hasi'rittakkinni Hospitaalete keeshshatta gede assitannoheni?**

29  Ee

30  Dee'ni

31  
32  
33  
34 **431. Fayyimmate ogeeyye amma'na, daga, diro, dagoommittete garanna keeranchimma kaima assite wolu mannira assinannihunni baxxino garinni lainohen?**

35  Ee

36  Dee'ni

# Reporting checklist for quality improvement study.

Based on the SQUIRE guidelines.

## Instructions to authors

Complete this checklist by entering the page numbers from your manuscript where readers will find each of the items listed below.

Your article may not currently address all the items on the checklist. Please modify your text to include the missing information. If you are certain that an item does not apply, please write "n/a" and provide a short explanation.

Upload your completed checklist as an extra file when you submit to a journal.

In your methods section, say that you used the SQUIRE reporting guidelines, and cite them as:

Ogrinc G, Davies L, Goodman D, Batalden P, Davidoff F, Stevens D. SQUIRE 2.0 (Standards for Quality Improvement Reporting Excellence): revised publication guidelines from a detailed consensus process

|                    | Reporting Item                                                                                                                                                                                                         | Page Number |
|--------------------|------------------------------------------------------------------------------------------------------------------------------------------------------------------------------------------------------------------------|-------------|
| <b>Title</b>       |                                                                                                                                                                                                                        |             |
| <a href="#">#1</a> | Indicate that the manuscript concerns an initiative to improve healthcare (broadly defined to include the quality, safety, effectiveness, patientcenteredness, timeliness, cost, efficiency, and equity of healthcare) | 1           |

## Abstract

[#02a](#) Provide adequate information to aid in searching and indexing 2

[#02b](#) Summarize all key information from various sections of the text using the abstract format of the intended publication or a structured summary such as: background, local problem, methods, interventions, results, conclusions 2

## Introduction

[#3](#) Nature and significance of the local problem description 4

[#4](#) Available knowledge Summary of what is currently known about the problem, including relevant previous studies 4,5,6

[#5](#) Rationale Informal or formal frameworks, models, concepts, and / or theories used to explain the problem, any reasons or assumptions that were used to develop the intervention(s), and reasons why the intervention(s) was expected to work 5,6

[#6](#) Specific aims Purpose of the project and of this report 6

## Methods

[#7](#) Context Contextual elements considered important at the outset of introducing the intervention(s) 6,7

[#08a](#) Intervention(s) Description of the intervention(s) in sufficient detail that others could reproduce it 7,8,9

|    |                 |                      |                                                                   |          |
|----|-----------------|----------------------|-------------------------------------------------------------------|----------|
| 1  | Intervention(s) | <a href="#">#08b</a> | Specifics of the team involved in the work                        | 8,9      |
| 2  |                 |                      |                                                                   |          |
| 3  |                 |                      |                                                                   |          |
| 4  | Study of the    | <a href="#">#09a</a> | Approach chosen for assessing the impact of the                   | 10,11,12 |
| 5  |                 |                      |                                                                   |          |
| 6  | Intervention(s) |                      | intervention(s)                                                   |          |
| 7  |                 |                      |                                                                   |          |
| 8  |                 |                      |                                                                   |          |
| 9  |                 |                      |                                                                   |          |
| 10 | Study of the    | <a href="#">#09b</a> | Approach used to establish whether the observed outcomes          | 12,13    |
| 11 |                 |                      |                                                                   |          |
| 12 | Intervention(s) |                      | were due to the intervention(s)                                   |          |
| 13 |                 |                      |                                                                   |          |
| 14 |                 |                      |                                                                   |          |
| 15 | Measures        | <a href="#">#10a</a> | Measures chosen for studying processes and outcomes of            | 10,11    |
| 16 |                 |                      |                                                                   |          |
| 17 |                 |                      | the intervention(s), including rationale for choosing them,       |          |
| 18 |                 |                      |                                                                   |          |
| 19 |                 |                      | their operational definitions, and their validity and reliability |          |
| 20 |                 |                      |                                                                   |          |
| 21 |                 |                      |                                                                   |          |
| 22 |                 |                      |                                                                   |          |
| 23 | Measures        | <a href="#">#10b</a> | Description of the approach to the ongoing assessment of          | NA       |
| 24 |                 |                      |                                                                   |          |
| 25 |                 |                      | contextual elements that contributed to the success, failure,     |          |
| 26 |                 |                      |                                                                   |          |
| 27 |                 |                      | efficiency, and cost                                              |          |
| 28 |                 |                      |                                                                   |          |
| 29 |                 |                      |                                                                   |          |
| 30 | Measures        | <a href="#">#10c</a> | Methods employed for assessing completeness and accuracy          | 11,12    |
| 31 |                 |                      |                                                                   |          |
| 32 |                 |                      | of data                                                           |          |
| 33 |                 |                      |                                                                   |          |
| 34 |                 |                      |                                                                   |          |
| 35 |                 |                      |                                                                   |          |
| 36 | Analysis        | <a href="#">#11a</a> | Qualitative and quantitative methods used to draw inferences      | 12,13    |
| 37 |                 |                      |                                                                   |          |
| 38 |                 |                      | from the data                                                     |          |
| 39 |                 |                      |                                                                   |          |
| 40 |                 |                      |                                                                   |          |
| 41 | Analysis        | <a href="#">#11b</a> | Methods for understanding variation within the data, including    | 12       |
| 42 |                 |                      |                                                                   |          |
| 43 |                 |                      | the effects of time as a variable                                 |          |
| 44 |                 |                      |                                                                   |          |
| 45 |                 |                      |                                                                   |          |
| 46 | Ethical         | <a href="#">#12</a>  | Ethical aspects of implementing and studying the                  | 22       |
| 47 |                 |                      |                                                                   |          |
| 48 | considerations  |                      | intervention(s) and how they were addressed, including, but       |          |
| 49 |                 |                      |                                                                   |          |
| 50 |                 |                      | not limited to, formal ethics review and potential conflict(s) of |          |
| 51 |                 |                      |                                                                   |          |
| 52 |                 |                      | interest                                                          |          |
| 53 |                 |                      |                                                                   |          |
| 54 |                 |                      |                                                                   |          |
| 55 |                 |                      |                                                                   |          |
| 56 | <b>Results</b>  |                      |                                                                   |          |
| 57 |                 |                      |                                                                   |          |
| 58 |                 |                      |                                                                   |          |
| 59 |                 |                      |                                                                   |          |
| 60 |                 |                      |                                                                   |          |

|    |                   |                      |                                                                    |          |
|----|-------------------|----------------------|--------------------------------------------------------------------|----------|
| 1  |                   | <a href="#">#13a</a> | Initial steps of the intervention(s) and their evolution over time | 8; Supp. |
| 2  |                   |                      | (e.g., time-line diagram, flow chart, or table), including         | file 6   |
| 3  |                   |                      | modifications made to the intervention during the project          |          |
| 4  |                   |                      |                                                                    |          |
| 5  |                   |                      |                                                                    |          |
| 6  |                   |                      |                                                                    |          |
| 7  |                   |                      |                                                                    |          |
| 8  |                   |                      |                                                                    |          |
| 9  |                   | <a href="#">#13b</a> | Details of the process measures and outcome                        | 14,15,16 |
| 10 |                   |                      |                                                                    |          |
| 11 |                   |                      |                                                                    |          |
| 12 |                   | <a href="#">#13c</a> | Contextual elements that interacted with the intervention(s)       | 15,16    |
| 13 |                   |                      |                                                                    |          |
| 14 |                   |                      |                                                                    |          |
| 15 |                   | <a href="#">#13d</a> | Observed associations between outcomes, interventions, and         | 15,16    |
| 16 |                   |                      | relevant contextual elements                                       |          |
| 17 |                   |                      |                                                                    |          |
| 18 |                   |                      |                                                                    |          |
| 19 |                   |                      |                                                                    |          |
| 20 |                   | <a href="#">#13e</a> | Unintended consequences such as unexpected benefits,               | NA       |
| 21 |                   |                      | problems, failures, or costs associated with the                   |          |
| 22 |                   |                      | intervention(s).                                                   |          |
| 23 |                   |                      |                                                                    |          |
| 24 |                   |                      |                                                                    |          |
| 25 |                   |                      |                                                                    |          |
| 26 |                   |                      |                                                                    |          |
| 27 |                   |                      |                                                                    |          |
| 28 |                   | <a href="#">#13f</a> | Details about missing data                                         | NA       |
| 29 |                   |                      |                                                                    |          |
| 30 |                   |                      |                                                                    |          |
| 31 | <b>Discussion</b> |                      |                                                                    |          |
| 32 |                   |                      |                                                                    |          |
| 33 |                   |                      |                                                                    |          |
| 34 | Summary           | <a href="#">#14a</a> | Key findings, including relevance to the rationale and specific    | 17       |
| 35 |                   |                      | aims                                                               |          |
| 36 |                   |                      |                                                                    |          |
| 37 |                   |                      |                                                                    |          |
| 38 |                   |                      |                                                                    |          |
| 39 | Summary           | <a href="#">#14b</a> | Particular strengths of the project                                | 17,20    |
| 40 |                   |                      |                                                                    |          |
| 41 |                   |                      |                                                                    |          |
| 42 |                   |                      |                                                                    |          |
| 43 | Interpretation    | <a href="#">#15a</a> | Nature of the association between the intervention(s) and the      | 17,18    |
| 44 |                   |                      | outcomes                                                           |          |
| 45 |                   |                      |                                                                    |          |
| 46 |                   |                      |                                                                    |          |
| 47 |                   |                      |                                                                    |          |
| 48 | Interpretation    | <a href="#">#15b</a> | Comparison of results with findings from other publications        | 17-20    |
| 49 |                   |                      |                                                                    |          |
| 50 |                   |                      |                                                                    |          |
| 51 | Interpretation    | <a href="#">#15c</a> | Impact of the project on people and systems                        | 18-20    |
| 52 |                   |                      |                                                                    |          |
| 53 |                   |                      |                                                                    |          |
| 54 | Interpretation    | <a href="#">#15d</a> | Reasons for any differences between observed and                   | 18,19    |
| 55 |                   |                      | anticipated outcomes, including the influence of context           |          |
| 56 |                   |                      |                                                                    |          |
| 57 |                   |                      |                                                                    |          |
| 58 |                   |                      |                                                                    |          |
| 59 |                   |                      |                                                                    |          |
| 60 |                   |                      |                                                                    |          |

|    |                    |                      |                                                               |       |
|----|--------------------|----------------------|---------------------------------------------------------------|-------|
| 1  | Interpretation     | <a href="#">#15e</a> | Costs and strategic trade-offs, including opportunity costs   | NA    |
| 2  |                    |                      |                                                               |       |
| 3  |                    |                      |                                                               |       |
| 4  | Limitations        | <a href="#">#16a</a> | Limits to the generalizability of the work                    | 20,21 |
| 5  |                    |                      |                                                               |       |
| 6  |                    |                      |                                                               |       |
| 7  | Limitations        | <a href="#">#16b</a> | Factors that might have limited internal validity such as     | 20,21 |
| 8  |                    |                      | confounding, bias, or imprecision in the design, methods,     |       |
| 9  |                    |                      | measurement, or analysis                                      |       |
| 10 |                    |                      |                                                               |       |
| 11 |                    |                      |                                                               |       |
| 12 |                    |                      |                                                               |       |
| 13 |                    |                      |                                                               |       |
| 14 |                    |                      |                                                               |       |
| 15 | Limitations        | <a href="#">#16c</a> | Efforts made to minimize and adjust for limitations           | 20    |
| 16 |                    |                      |                                                               |       |
| 17 |                    |                      |                                                               |       |
| 18 | Conclusion         | <a href="#">#17a</a> | Usefulness of the work                                        | 21    |
| 19 |                    |                      |                                                               |       |
| 20 |                    |                      |                                                               |       |
| 21 | Conclusion         | <a href="#">#17b</a> | Sustainability                                                | 21    |
| 22 |                    |                      |                                                               |       |
| 23 |                    |                      |                                                               |       |
| 24 | Conclusion         | <a href="#">#17c</a> | Potential for spread to other contexts                        | 21    |
| 25 |                    |                      |                                                               |       |
| 26 |                    |                      |                                                               |       |
| 27 | Conclusion         | <a href="#">#17d</a> | Implications for practice and for further study in the field  | 21    |
| 28 |                    |                      |                                                               |       |
| 29 |                    |                      |                                                               |       |
| 30 | Conclusion         | <a href="#">#17e</a> | Suggested next steps                                          | 21    |
| 31 |                    |                      |                                                               |       |
| 32 |                    |                      |                                                               |       |
| 33 |                    |                      |                                                               |       |
| 34 | <b>Other</b>       |                      |                                                               |       |
| 35 |                    |                      |                                                               |       |
| 36 | <b>information</b> |                      |                                                               |       |
| 37 |                    |                      |                                                               |       |
| 38 |                    |                      |                                                               |       |
| 39 | Funding            | <a href="#">#18</a>  | Sources of funding that supported this work. Role, if any, of | 22    |
| 40 |                    |                      | the funding organization in the design, implementation,       |       |
| 41 |                    |                      | interpretation, and reporting                                 |       |
| 42 |                    |                      |                                                               |       |
| 43 |                    |                      |                                                               |       |
| 44 |                    |                      |                                                               |       |
| 45 |                    |                      |                                                               |       |

None The SQUIRE 2.0 checklist is distributed under the terms of the Creative Commons Attribution License CC BY-NC 4.0. This checklist can be completed online using <https://www.goodreports.org/>, a tool made by the [EQUATOR Network](#) in collaboration with [Penelope.ai](#)
