# Supplementary material for: Mitigating the mistreatment of childbearing women: evaluation of respectful maternity care intervention in Ethiopian hospitals
Source: PubMed Central journal article supplement — BMJ Open. 2020 Sep 3;10(9):e038871. doi: 10.1136/bmjopen-2020-038871 (PMC7473661; doi:10.1136/bmjopen-2020-038871), 2020-09-03
Supplement: bmjopen-2020-038871supp001.pdf [file bmjopen-2020-038871supp001.pdf]

## Supplementary file 1

## Facility-led respectful maternity care assessment checklist for continuous quality improvement

| RMC standards                                    | Measurement criteria<br>O: observation; I: interview; RD: review of documents                                                 | NA | Remark |
|--------------------------------------------------|-------------------------------------------------------------------------------------------------------------------------------|----|--------|
| The woman is protected from verbal abuse         | [ ] 1. Uses polite language, avoids use of harsh or rude language (O)                                                         |    |        |
|                                                  | [ ] 2. Does not make judgmental or accusatory comments (O)                                                                    |    |        |
|                                                  | [ ] 3. Does not make threats to withhold treatment (O)                                                                        |    |        |
|                                                  | [ ] 4. Does not blame a woman for any feature of her birth outcome/s (O)                                                      |    |        |
| Score                                            | of                                                                                                                            |    |        |
| The woman is protected from physical abuse       | [ ] 1. Does not beat, slap, kick, or pinch a woman (O)                                                                        |    |        |
|                                                  | [ ] 2. Does not deny a woman to cry or scream during labor (O)                                                                |    |        |
|                                                  | [ ] 3. Does not restrain (tie) a woman (O)                                                                                    |    |        |
| Score                                            | of                                                                                                                            |    |        |
| The woman is not stigmatized or discriminated    | [ ] 1. Serves a woman respectfully regardless of her religion/race/ethnicity/age/socioeconomic status/medical condition (O/I) |    |        |
|                                                  | [ ] 2. Serves a woman respectfully regardless of her medical condition (O/I)                                                  |    |        |
| Score                                            | of                                                                                                                            |    |        |
| The woman received professional standard of care | [ ] 1. Seeks for woman's consent prior to performing any procedure (O)                                                        |    |        |
|                                                  | [ ] 2. Never shouts loudly when communicating woman's information to other staff (O/I)                                        |    |        |
|                                                  | [ ] 3. Keeps woman's personal information secure (O/I/RD)                                                                     |    |        |
|                                                  | [ ] 4. Performs vaginal examination very gently to minimize pain (O/I)                                                        |    |        |
|                                                  | [ ] 5. Maintains woman's privacy while performing vaginal examination (O/I)                                                   |    |        |
|                                                  | [ ] 6. Gives a woman pain relief when she needs it (O/I)                                                                      |    |        |
|                                                  | [ ] 7. Obtains woman's consent before preparing her for surgery (O/I)                                                         |    |        |
|                                                  | [ ] 8. Responds to a woman immediately following her call (O/I)                                                               |    |        |
|                                                  | [ ] 9. Never leaves a woman alone during labour (O/I)                                                                         |    |        |
| Score                                            | of                                                                                                                            |    |        |
|                                                  | [ ] 1. Introduces himself/herself to a woman when he/she first meet her (I/O)                                                 |    |        |

|                                                                      |                          |                                                                                               |  |  |
|----------------------------------------------------------------------|--------------------------|-----------------------------------------------------------------------------------------------|--|--|
| The woman received care with good provider rapport and communication | <input type="checkbox"/> | 2. Serves a woman in a polite manner (I/O)                                                    |  |  |
|                                                                      | <input type="checkbox"/> | 3. Does not ignore woman's concern/s while she is in labor (I/O)                              |  |  |
|                                                                      | <input type="checkbox"/> | 4. Speaks to a woman in a clear language (I/O)                                                |  |  |
|                                                                      | <input type="checkbox"/> | 5. Gives a woman periodic updates of progress of labor (O/I)                                  |  |  |
|                                                                      | <input type="checkbox"/> | 6. Gives credit to every effort a woman makes in labor (O/I)                                  |  |  |
|                                                                      | <input type="checkbox"/> | 7. Allows a woman to move around during labor unless there is an indication to deny her (O/I) |  |  |
|                                                                      | <input type="checkbox"/> | 8. Allows a woman to take food or fluids if there is no other indication to deny her (I/O)    |  |  |
|                                                                      | <input type="checkbox"/> | 9. Allows woman's birth companions for companionship (I/O)                                    |  |  |
|                                                                      | <input type="checkbox"/> | 10. Allows a woman to assume position of her choice during labor (I/O)                        |  |  |
|                                                                      | <input type="checkbox"/> | 11. Allows a woman any cultural practice she wants to practice in labor (I/O)                 |  |  |
|                                                                      | <input type="checkbox"/> | 12. Does not objectify a woman in labor (I/O)                                                 |  |  |
|                                                                      | <input type="checkbox"/> | 13. Does not make a woman stay in the hospital without her will (I/O)                         |  |  |
|                                                                      | <input type="checkbox"/> | 14. Keeps a baby with his mom unless there is another indication (O/I)                        |  |  |
|                                                                      | Score                    | _____ of _____                                                                                |  |  |
| Grand score                                                          | _____ of _____           |                                                                                               |  |  |

NA: Not applicable

## Action plan matrix to improve respectful maternity care

| Indicator (intended target) | Possible cause (key causes) | Action taken (test action) | Responsible person | Support required | Timeline (dd/mm/yy) | Evaluate/ lesson learned (study) | Action for the next cycle                                                                           |
|-----------------------------|-----------------------------|----------------------------|--------------------|------------------|---------------------|----------------------------------|-----------------------------------------------------------------------------------------------------|
| I:                          | C1:                         |                            |                    |                  |                     |                                  | <input type="checkbox"/> Modify<br><input type="checkbox"/> Expand<br><input type="checkbox"/> Drop |
| T:                          | C2:                         |                            |                    |                  |                     |                                  |                                                                                                     |
|                             |                             |                            |                    |                  |                     |                                  |                                                                                                     |
|                             |                             |                            |                    |                  |                     |                                  |                                                                                                     |
|                             |                             |                            |                    |                  |                     |                                  |                                                                                                     |
|                             |                             |                            |                    |                  |                     |                                  |                                                                                                     |
|                             |                             |                            |                    |                  |                     |                                  |                                                                                                     |
|                             |                             |                            |                    |                  |                     |                                  |                                                                                                     |
|                             |                             |                            |                    |                  |                     |                                  |                                                                                                     |
|                             |                             |                            |                    |                  |                     |                                  |                                                                                                     |
