# Supplementary material for: Mitigating the mistreatment of childbearing women: evaluation of respectful maternity care intervention in Ethiopian hospitals
Source: PubMed Central journal article supplement — BMJ Open. 2020 Sep 3;10(9):e038871. doi: 10.1136/bmjopen-2020-038871 (PMC7473661; doi:10.1136/bmjopen-2020-038871), 2020-09-03
Supplement: bmjopen-2020-038871supp002.pdf [file bmjopen-2020-038871supp002.pdf]

## Supplementary file 2: Order of studies and timing of data collection

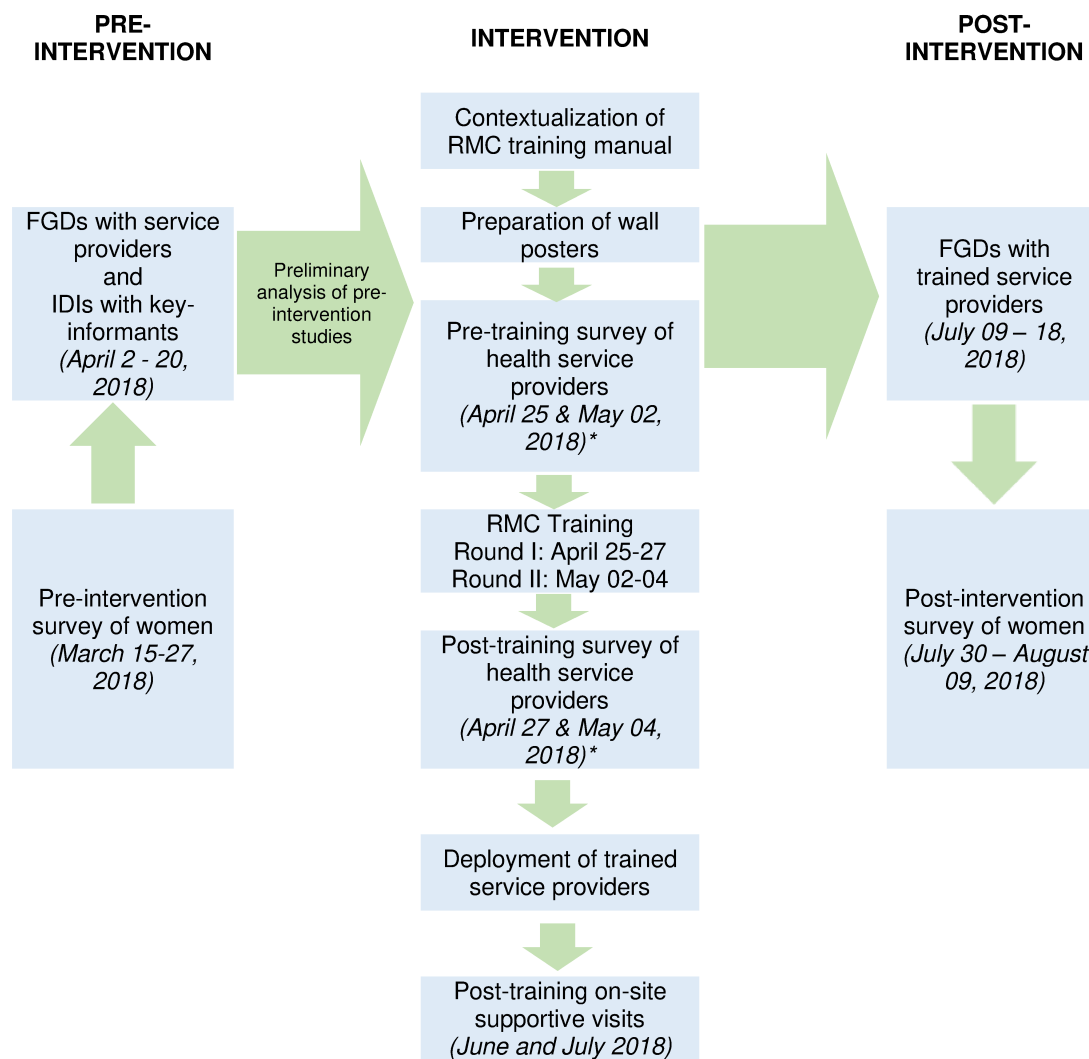

*RMC-respectful maternity care*

\*RMC training was conducted in two rounds from 25-27 April 2018 and 02-04 May 2018.

The post intervention FGDs and the post-intervention survey of women providers were conducted after the intervention has been completed
