# Supplementary material for: Mitigating the mistreatment of childbearing women: evaluation of respectful maternity care intervention in Ethiopian hospitals
Source: PubMed Central journal article supplement — BMJ Open. 2020 Sep 3;10(9):e038871. doi: 10.1136/bmjopen-2020-038871 (PMC7473661; doi:10.1136/bmjopen-2020-038871), 2020-09-03
Supplement: bmjopen-2020-038871supp003.pdf [file bmjopen-2020-038871supp003.pdf]

6/18/2020

RMC women's survey

## RMC women's survey

Dear data collector, please read the plain language summary and seek for participants consent before proceeding to the survey

**Did the woman agree to participate?**

- Yes  
 No

**Name of data collector**

- Helen  
 Lemlem  
 Maereg

**Interview code (three digits)**  

---

**Hospital**

- Adare  
 Leku  
 Yirgalem

**101. Place of residence**

- Urban Kebele  
 Rural kebele

**102. Age in completed years**  

---

**103. Age at first pregnancy (in years)**  

---

**104. Marital status**

- Single  
 Married  
 Separated  
 Divorced  
 Widowed

6/18/2020

RMC women's survey

**105. Religion**

- Protestant, christian
- Orthodox, christian
- Muslim
- Christian Catholic
- Others

**106. Ethnicity**

- Sidama
- Amhara
- Oromo
- Wolayita
- Others

**107. Educational status**

- No formal education
- Some primary - did not complete grade 8
- Completed grade 8
- Some secondary - did not complete grade 12
- Completed grade 12
- More than secondary

**108. Occupation**

- Housewife
- Farmer
- Private employee
- Government employee
- Private business
- Others

**109. How many children do you have?**  

---

**110. Do you have regular household monthly income?**

- Yes
- No

**111. Estimated monthly income (in birr)**  

---

6/18/2020

RMC women's survey

**201. How many times have you delivered before? (including current one)**

---

**202. Where did you deliver your last (previous) child?**

- Health facility
- Home
- Traditional birth attendant's home
- On my way to health facility

**203. How many times have you delivered in health facility? (excluding current one)?**

---

**204. Did you have antenatal care visit during your current pregnancy?**

- Yes
- No

**205. How many antenatal care visits did you have?**

- One
- Two
- Three or more
- Don't remember

**206. Did you have any complication during your current pregnancy?**

- Yes
- No
- I don't know

**207. Did you have any complication during your current labor and delivery?**

- Yes
- No

**301. Were you referred from other facility or directly came here in?**

- Referred
- Non-referred

**302. What time did you get admitted to the hospital?**

yyyy-mm-dd

hh:mm

6/18/2020

RMC women's survey

**303. What time did you deliver?**

yyyy-mm-dd

hh:mm

**304. What type of ward were you admitted in?**

- Private ward
- Shared ward

**305. What was gender of the service provider who mainly assisted you in labor?**

- Female
- Male

**306. What type of birth did you have?**

- Vaginal birth
- Caesarean birth after labour trial
- Caesarean birth without labour trial

**307. Did you have any procedure for an assisted delivery?**

- Yes
- No

**308. Which procedure did you receive? (Multiple responses possible)**

- Vacuum
- Forceps
- Episiotomy

**401. Did the health workers use harsh or rude language?**

- Yes
- No

**402. Did the health workers make judgmental or accusatory comments about you?**

- Yes
- No

**403. Were you beaten, slapped, kicked, or pinched during childbirth?**

- Yes
- No

**404. Were you gagged during childbirth?**

- Yes
- No

6/18/2020

RMC women's survey

**405. Were you physically restrained during childbirth?**

- Yes  
 No

**406. Did the health workers make threats of withholding treatment?**

- Yes  
 No

**407. Did the health workers blame you for any feature of your birth outcomes?**

- Yes  
 No

**408. Did the health workers obtain your consent for all procedures?**

- Yes  
 No

**409. Did the health workers keep information about you confidential?**

- Yes  
 No

**410. Did you have any surgical procedure (episiotomy, cesarean section)?**

- Yes  
 No

**411. Did the health worker ask your permission before performing surgery?**

- Yes  
 No

**412. Did the health workers always come following your call?**

- Yes  
 No

**413. Were you ever left for a prolonged period of time without attention during your labour?**

- Yes  
 No

**414. Was a health provider present for the actual birth of your baby?**

- Yes  
 No

**415. Did the health workers ever separate you from your baby without explaining the reason?**

- Yes  
 No

6/18/2020

RMC women's survey

**416. Did the health workers ask your permission before conducting a vaginal examination?**

- Yes  
 No

**417. Did any health worker conduct vaginal examination without maintaining your privacy?**

- Yes  
 No

**418. Did the health workers speak to you in a language you do not understand?**

- Yes  
 No

**419. Did the health workers give you periodic updates on your labor?**

- Yes  
 No

**420. Did you want to have a birth companion in the labor ward?**

- Yes  
 No

**421. Did the health workers allow you to have your birth companion present?**

- Yes  
 No  
 I was afraid to ask

**422. Did you want to move around during your labor?**

- Yes  
 No

**423. Did the health workers allow you to move around during your labor?**

- Yes  
 No

**424. Did you want to have food or fluids during your labor?**

- Yes  
 No

**425. Did the health workers allow you to have food or fluids?**

- Yes  
 No

6/18/2020

RMC women's survey

**426. Did you have a preferred birthing position?**

- Yes  
 No

**427. Did the health workers allow you to deliver in your preferred position?**

- Yes  
 No  
 I was afraid to ask

**428. Did you want to have a cultural practice in labor?**

- Yes  
 No

**429. Did the health workers allow you this cultural practice in labor?**

- Yes  
 No  
 I was afraid to ask

**430. Did the health workers make you stay in the hospital against your will?**

- Yes  
 No

**431. Did the health workers discriminate you based on your religion /ethnicity/age/socioeconomic status/medical condition?**

- Yes  
 No

6/18/2020

RMC women's survey

# RMC women's survey

ከመጀመርያ በፊት የጥናቱን ዓላማ እዚህ ላይ በተጻፈው በማስረዳት የተሳታፊዎን ፈቃድ ጠይቁ

የጥናቱ ተጋባዥ ለመሳተፍ ፈቃደኛ ናት?

- አዎ
- አይ

የመረጃ ሰብሳቢ ስም

- ሐላን
- ለምለም
- ማዕረግ

የቃለ መጠይቅ ኮድ

የሆስፒታል ስም

- አዳሬ
- ለኩ
- ይርጋዓለም

101. የመኖሪያ አድራሻ

- የከተማ ቀበሌ
- የገጠር ቀበሌ

102. ዕድሜ

103. ለመጀመሪያ ጊዜ ያረገዙት በስንት እድሜዎት ነው?

104. የጋብቻ ሁኔታ

- ያላገባች
- ያገባች
- የተለያዩች
- የተፋታች
- ባል የግጥተባት



6/18/2020

RMC women's survey

**105. ሃይማኖት**

- ፕሮቴስታንት
- ኦርቶዶክስ
- ሙስሊም
- ካቶሊክ
- ሌላ

**106. ብሔር**

- ሲዳማ
- አማራ
- ኦሮሞ
- ወላይታ
- ሌላ

**107. የትምህርት ደረጃ**

- ያልተማረች
- አንደኛ ደረጃ (1-8)
- ስምንተኛ ክፍል ያጠናቀቀች
- ሁለተኛ ደረጃ (9-12)
- አሥራ ሁለተኛ ክፍል ያጠናቀቀች
- ከአሥራ ሁለተኛ ክፍል በላይ

**108. የሥራ ዓይነት**

- የቤት አመቤት
- አርሶ አደር/አርብቶ አደር
- የግል ተቀጣሪ
- የመንግስት ተቀጣሪ
- የግል ንግድ
- ሌላ

**109. ስንት ልጅ አለዎት?****110. ቋሚ ወርሃዊ ገቢ አለዎት?**

- አዎ
- አይ

**111. አማካይ የወር ገቢ (በብር)**

6/18/2020

RMC women's survey

201. ከዚህ በፊት ስንት ጊዜ ወልደዋል? (የአሁኑን እርግዝና ጨምሮ)

\_\_\_\_\_

202. ከዚህ ቀደም ያለውን/ያለችውን ልጅዎን የት ነው የወለዱት?

- የጤና ድርጅት
- ቤት
- የልምድ አዋላጅ ቤት
- ወደ ጤና ድርጅት ስመጣ በመንገድ ላይ

203. በጤና ድርጅት ውስጥ ስንት ጊዜ ወልደው ያውቃሉ? (የአሁኑን ወሊድ ሳይጨምር)

\_\_\_\_\_

204. በአሁኑ እርግዝናዎ የእርግዝና ከትትል አድርገው ነበር?

- አዎን
- አይ

205. ስንት የእርግዝና ከትትል አደረጉ?

- አንድ
- ሁለት
- ሦሥትና ከዚያ በላይ
- አላስታውስም

206. በአሁኑ እርግዝናዎ ወቅት ያጋጠመዎት የእርግዝና እክል /ችግር/ ነበር?

- አዎን
- አይ
- አላውቅም

207. በአሁኑ ወሊድ ጊዜ ያጋጠመዎት እክል /ችግር/ ነበር?

- አዎን
- አይ

301. ከሌላ የጤና ተቋም ሪፈረ ተጽፎልዎት ነው ወይስ በቀጥታ ነው ወደዚህ ሆስፒታል የመጡት?

- ሪፈረ ተጽፎልኝ
- በቀጥታ

302. መቼ እና በስንት ሰዓት ላይ ነበር ወደ ማዋለጃ ክፍል የመጡት?

yyyy-mm-dd

hh:mm

6/18/2020

RMC women's survey

303. መቼ እና በስንት ሰዓት ላይ ነበር የወለዱት?

yyyy-mm-dd

hh:mm

304. በየትኛው አይነት ዋርድ/መተኛ ክፍል/ ውስጥ ነበር የተኙት?

- የግል ዋርድ (አንድ ሰው ብቻ የሚተኛበት)
- የጋራ ዋርድ

305. በዋነኛነት ያዋለደዎት የጤና ባለሙያ ጾታ ምንድን ነው?

- ሴት
- ወንድ

306. በምን አይነት ዘዴ ነበር የወለዱት?

- በምጥ (በማህጸን በር) ብቻ
- በምጥ ተሞክሮ ስላልተሳካ በአፕራሲያን
- ምጥ ሳይሞክር በቀጥታ በአፕራሲያን

307. ጤና ባለሙያዎች ልጅዎን ከማህጸን በር ለማውጣት የሚያግዝ መሳሪያ ተጠቅመው ወይም እስተኝት አድርገውሎት ነበር?

- አዎን
- አይ

308. ምን አይነት ዘዴ/መሳሪያ/ ነበር የተጠቀሙት?

- ጭንቅላት ላይ የሚደረግ የብረት ኩባያ (Vacuum)
- ጭንቅላት ላይ የሚደረግ መቆንጠጫ (Forceps)
- እስተኝት (Episiotomy)

401. ያዋለዱዎት የጤና ባለሙያ የሚያጸይፍ/ክብረ ነክ የሆነ ንግግር ተናግረዎት ነበር?

- አዎን
- አይ

402. ያዋለዱዎት የጤና ባለሙያ አርስዎን የሚፈርድ/ጥፋተኛ ለማድረግ ያለመ ንግግር ተናግረው ነበር?

- አዎን
- አይ

403. በወሊድ ጊዜዎ የጤና ባለሙያ መትቶዎት/ቆንጥጦዎት/ገፍትሮዎት/ሰውነትዎን በጥፊ መትቶዎት ነበር?

- አዎን
- አይ

404. በምጥ ጊዜ የጤና ባለሙያዎች ከምጥ ህመም የተነሳ እንዳያቃስቱ/እንዳይጮሁ አስገድዶዎት ነበር?

- አዎን
- አይ

6/18/2020

RMC women's survey

405. በምጥም ጊዜ እንዳይንቀሳቀሱ ታስረው/ታግደው ነበር?

- አዎን
- አይ

406. ያዋለዱዎት የጤና ባለሙያ ከትትል/ሕክምና አልሰጥዎትም በማለት ዝተው ነበር?

- አዎን
- አይ

407. ያዋለዱዎት የጤና ባለሙያ በወሊድዎ ጊዜ ለተፈጠረው ሁሉ ነገር ወቅሶዎት ነበር?

- አዎን
- አይ

408. ያዋለዱዎት የጤና ባለሙያ ምርመራ ሲያደርጉ የእርስዎን ፈቃድ ይጠይቁ ነበር?

- አዎን
- አይ

409. ያዋለዱዎት የጤና ባለሙያ የእርስዎን የግል መረጃ በሚሰጥበት ይይዙ ነበር?

- አዎን
- አይ

410. በዛሬው ወሊድዎ ጊዜ የቀዶ ጥገና ተደርጎልዎት ነበር? (እስተትች/አጥራሲዮን)

- አዎን
- አይ

411. የጤና ባለሙያው እስተትች/አጥራሲዮን ከመሰራታቸው በፊት የእርስዎን ፈቃድ ጠይቀው ነበር?

- አዎን
- አይ

412. ያዋለዱዎት የጤና ባለሙያ እርስዎን አገዛ ፈልገው ሲጠሩ ሁልጊዜ ይመጡ ነበር?

- አዎን
- አይ

413. በወሊድ ጊዜዎ ለረጅም ሰዓት ያለጤና ባለሙያ ከትትል ብቻዎን ተትተው ነበር?

- አዎን
- አይ

414. ልጅዎን በወለዱ ሰዓት የጤና ባለሙያ አጠገብዎ ነበር?

- አዎን
- አይ

415. ያዋለዱዎት የጤና ባለሙያ ምክንያቱን ሳይነግሩዎት ልጅዎን ከእርዎ የተለየ ቦታ አድርገው ነበር?

- አዎን
- አይ

6/18/2020

RMC women's survey

416. የዋለዳዎት የጤና ባለሙያ የማህጸን ምርመራ ሲያደርጉልዎት ፈቃድዎን ይጠይቁ ነበር?

- አዎን
- አይ

417. የዋለዳዎት የጤና ባለሙያ ሌሎች ሰዎች እንዳያዩ መከለያ ሳያደርጉ የማህጸን ምርመራ አድርገልዎት ነበር?

- አዎን
- አይ

418. የዋለዳዎት የጤና ባለሙያ በማይረዱትና በማይገባዎት መልክ ይናገሩ ነበር?

- አዎን
- አይ

419. የዋለዳዎት የጤና ባለሙያ የምጥዎን ሂደት ይነግሩዎት ነበር?

- አዎን
- አይ

420. በወሊድዎ ጊዜ የራስዎ ሰው/ዘመድ (ድጋፍ ሰጪ) አብሮዎት ማዋለጃ ክፍል እንዲሆን ፈልገው ነበር?

- አዎን
- አይ

421. የጤና ባለሙያዎች የራስዎ ሰው/ዘመድ (ድጋፍ ሰጪ) አብሮዎት ማዋለጃ ክፍል እንዲሆን ፈቅደውሎት ነበር?

- አዎን
- አይ
- መጠየቅ ፈርቼ አልጠየቅኩም

422. በምጥዎ ጊዜ መንቀሳቀስ ፈልገው ነበር?

- አዎን
- አይ

423. የጤና ባለሙያዎች በምጥዎ ጊዜ እንዲንቀሳቀሱ ፈቅደውልዎት ነበር?

- አዎን
- አይ

424. በምጥዎ ጊዜ ፈሳሽ ወይም ደረቅ ምግብ መውሰድ ፈልገው ነበር?

- አዎን
- አይ

425. የጤና ባለሙያዎች በምጥዎ ጊዜ ፈሳሽ ወይም ደረቅ ምግብ እንዲጠቀሙ ፈቅደውልዎት ነበር?

- አዎን
- አይ

6/18/2020

RMC women's survey

426. በወሊድዎ ጊዜ እንዲኖርዎት የፈለጉት አቀማመጥ ወይም አተኛኝነት ነበር?

- አዎን
- አይ

427. የጤና ባለሙያዎች በወሊድዎ ጊዜ ለእርዎ በሚመችዎት አቀማመጥ/አተኛኝነት እንዲወልዱ ፈቅደውልዎት ነበር?

- አዎን
- አይ
- መጠየቅ ፈርቼ አልጠየቅኩም

428. በወሊድዎ ጊዜ ባህላዊ ሥነሥርዓቶችን (ቡና ማፍላት/ገንፎ ማዘጋጀት/ቅቤ መቀባት/ወዘተ) ፈልገው ነበር?

- አዎን
- አይ

429. በወሊድዎ ጊዜ ባህላዊ ሥነሥርዓቶችን (ቡና ማፍላት/ገንፎ ማዘጋጀት/ቅቤ መቀባት/ወዘተ) እንዲያደርጉ ፈቅደውልዎት ነበር?

- አዎን
- አይ
- መጠየቅ ፈርቼ አልጠየቅኩም

430. ከወሊድዎ በኋላ ያለእርስዎ ፈቃድ በሆስፒታል እንዲቆዩ ተገደው ነበር?

- አዎን
- አይ

431. በወሊድዎ ጊዜ የጤና ባለሙያዎች በዘር/በሃይማኖት/በኢኮኖሚ አቅም/በዕድሜ የተነሳ መገለል አድርገውብዎት ነበር?

- አዎን
- አይ

6/18/2020

RMC women's survey

## RMC women's survey

Baxamootta taje gamba assattati, fiqaadensa afi'rate taje gamba assakki albaanni xaphishu hedo eeggatena seekkite xawisse nabbawinsa

### Ama hajo beeqqate sumuu yitino?

- Ee
- Dee'ni

### Taje gamba asannohu su'ma

- Helen
- Lemlem
- Maereg

### koode

---

### Hospitaale

- Adaare
- Lekku
- Yirgalamete

### 101. Mama hee'ratta?

- Katamu Qawalera
- Gaxarate Qawalera

### 102. Me'e wo'ma diro ikkannohe?

---

### 103. Umo godowitta woyite me'e diro ikkannohe?

---

### 104. Mine assi'rate gari hiittooti?

- Mine diassiroomma
- Mine assiroomma
- Baxxe hee'remma
- Giwame tidhamoomma
- Galte'ya reytino

6/18/2020

RMC women's survey

**105. Amma'na**

- Protestaantete kirstianati
- Ortodokisete kirstianaati
- Islaamaho
- Katolikete kirstiyanati
- Wolehoro kuli\_\_\_\_\_

**106. Daga**

- Sidama
- Amara
- Oromo
- Wolayita
- Wolehoro kuli\_\_\_\_\_

**107. Rosu deerri**

- Dirosoomma
- Umi deerra rose, kayinni 8 digudoma
- 8 gudoomma
- Layink deerra, kayinni 12 digudoomma
- 12 gudoomma
- Layink deer aleenniti

**108. Loosikki maati?**

- Mini amaati
- Baatto loosi're galeemma
- Gillete qaxaramoomma
- Mengistete looso loosema
- Umi'ya daddalo loosema
- Woleretiro kuli

**109. Me''e ooso noohe?**  

---

**110. Minikkira aganunni egennantino eo noohe?**

- Ee
- Dinoe

**111. Aganunni afi'ratahu me'e ikkanno(birrunni)**  

---



6/18/2020

RMC women's survey

**201. Xaahunni ledo xaa geeshsha me'e higge ilootta?**

---

**202. Sai qaaqqokki mama ilootta?**

- Fayyimmate uurrinshira
- Mine
- ilshiishanno amuwi mine
- Fayyimate uurrinsha haranni doogote

**203. Fayyimmate mine me'e higge ilootta? ( xaa qaaqqo agurranna)**

---

**204. Konne/Tenne qaaqqo Godowitta waro fayyimmate mine Godowinni noo amuwira uyinanni owaante/kaa'lo afi'rate ha'rootta**

- Ee
- Dee'ni/diha'roomma

**205. Owaante afi'rate me'e higge ha'rootta?**

- Mitte hige
- Lame hige
- Sase hige woyi hakuyi aleenni
- Diqaagemma

**206. Konne/Tenne qaaqqo godowitta waro lowo fayyimmate qarri iille egenninoheni?**

- Ee
- Dee'ni
- Diafoomma

**207. Konne/Tenne qaaqqo godowitta woyi ilitta woyite lowo qarri ille egenninoheni?**

- Ee
- Dee'ni

**301. Wole fayyimmate uurrinshanni sonkeennahenso qaxxitahuni dayoota?**

- Sonkeenna dayoomma
- Disonkeenna (mininni fulumma gedeenni dayoomma)

**302. Tenne hospitaalera goxxe aka'ma mamote hanafootta?**

---

yyyy-mm-dd

hh:mm

---

6/18/2020

RMC women's survey

**303. Ma yanna ilootta**

yyyy-mm-dd

hh:mm

**304. Goxxe fulitta kifile hiittoote?**

- Callu/mittu manchi kifileeti
- Woluno goxanno kifileeti

**305. Ilitta woyite fayyimmate ogeessi meyaatenso labbaaho?**

- Meyaate
- Labbaaho

**306. Hiittonni ilitta?**

- Qarru nookkiha illanni widoonni
- Shiimare wo'naalum mahu gedensaanni darreenna iloomma
- Shiimareno wo'naalum makki darreenna iloomma

**307. ilate kaa'lora yine wolere loonsiheri nooni?**

- Ee
- Dee'ni

**308. Hiittee ilate kaa'lo loonsonnihe?**

- Qaaqqu umo amadatenni kaa'lannorichchinni
- Qarawu gedeechchinni kaa'linoonnie
- Illanni doogo shiimawa daratenni kaa'linoonnie

**401. Fayyimmate ogeeyye kaajjado giwisanno qaale horonsdhuheni?**

- Ee
- Dee'ni

**402. Fayyimmate ogeeyye atere faradate woyi kassasate gedee hedo assitinoni?**

- Ee
- Dee'ni

**403. Ilitta woyite ganihehu, qawaadihehu, kadihehu woyi qi'miidihehu nooni?**

- Ee
- Dee'ni

**404. Ilitta woyite Fugihehunooni?**

- Ee
- Dee'ni

6/18/2020

RMC women's survey

**405. Ilitta woyite biso milli yaattakki gede hoollonniheni?**

- Ee  
 Dee'ni

**406. Fayyimmate ogeeyye kaa'lo ho'litanni waajjishiishshuheni?**

- Ee  
 Dee'ni

**407. Fayyimmate ogeeyye ileemmahu ma ikkannokka yitanni waajjottahura woqassuheni?**

- Ee  
 Dee'ni

**408. Fayyimmate Ogeeyye loossannohe loosira ate fajjo xa'mitinnohe?**

- Ee  
 Dee'ni

**409. Fayyimmate Ogeeyye atewi affanno Misixire maaxxanno?**

- Ee  
 Dee'ni

**410. Darre loonsonniheni (illanni doogo dara, Godowa darreenna ila)**

- Ee  
 Dee'ni

**411. Fayyimmate ogeeyye godowakki darate albaanni ate fajjo xa'mitino?**

- Ee  
 Dee'ni

**412. Fayyimmate Ogeeyye woshshirita woyite rakke dagganno?**

- Ee  
 Dee'ni

**413. Fayyimmate ogeeyye gamete aana hee'dheenna seeda yannara ate callakki agurte hadhinohe?**

- Ee  
 Dee'ni

**414. Fayyimmate Ogeeyye qaaqu ilami yannara mule no?**

- Ee  
 Dee'ni

**415. Fayyimmate ogeeyye atera korkaata kultukkinni qaaqqokki atewiinni baddinoni?**

- Ee  
 Dee'ni

6/18/2020

RMC women's survey

**416. Fayyimmate Ogeeyye illanni doogo mirmara assate albaanni ate fajjo xa'mitinohe?**

- Ee  
 Dee'ni

**417. Ayee fayyimmate ogeessi illanni doogo mirmara assanno woyite wolu la'annokki gede assikkinni la'annohe?**

- Ee  
 Dee'ni

**418. Fayyimmate ogeessi ati afoottakki qaalinni coo'rinoheni?**

- Ee  
 Dee'ni

**419. Fayyimmate ogeessi gamete yannara yanna yannante heedhanno lexxo kulannohe?**

- Ee  
 Dee'ni

**420. Ilate gamete goxootta kifilera jaallakki ledokki ikkitara hasi'ratani?**

- Ee  
 Dee'ni

**421. Fayyimmate ogeeyye jaallakki ledokki heedhannota fajjitinnohe?**

- Ee  
 Dee'ni  
 xa'ma waaje dixam'ooma

**422. Gamete yannara goxootta akawaawera milli yaa hasirottankanni?**

- Ee  
 Dee'ni

**423. Fayyimmate ogeeyye milli yaatta gede fajjitinnohe?**

- Ee  
 Dee'ni

**424. Gamete yannara itattara woyi agattara hasi'rattani?**

- Ee  
 Dee'ni

**425. Fayyimmate ogeeyye itattara woyi agattara fajjitinnohe?**

- Ee  
 Dee'ni

6/18/2020

RMC women's survey

**426. Ilatta woyite hedhahera hasirootta ofolla woyi goxa doodhotani?**

- Ee  
 Dee'ni

**427. Fayyimmate ogeessi ati doodhotta bayichcho heedhe ilattara fajjinnohe?**

- Ee  
 Dee'ni  
 xa'ma waaje dixam'ooma

**428. Gamete yannara budunni ilanno meentira assinannire atera assinahera hasi'rittani?**

- Ee  
 Dee'ni

**429. Fayyimmate ogeeyye gamete yannara budunni amuwaho assinannire atera assinahera fajjitinnohe?**

- Ee  
 Dee'ni  
 xa'ma waaje dixam'ooma

**430. Fayyimmate ogeeyye ati hasi'rittakkinni Hospitaalete keeshshatta gede assitannoheni?**

- Ee  
 Dee'ni

**431. Fayyimmate ogeeyye amma'na, daga, diro, dagoommittete garanna keeranchimma kaima assite wolu mannira assinannihunni baxxino garinni lainohen?**

- Ee  
 Dee'ni
